# Supplementary material for: Quantitative proteomic analysis reveals heat stress-induced injury in rat small intestine via activation of the MAPK and NF-κB signaling pathways
Source: Royal Society of Chemistry journal article supplement (doi:10.1039/c4mb00495g), 2014-12-08
Supplement: c4mb00495g2.xlsx [file c4mb00495g2.xlsx]

## Sheet: Sheet1
Table S1. All identified proteins affected by heat stress in rat small intestine
	Unused	Total	%Cov	%Cov(50)	%Cov(95)	Accession	Name	Peptides(95%)	117:114	PVal 117:114
1	160.32	160.32	40.58	37.06	33.84	tr|C0JPT7|C0JPT7_RAT	Filamin alpha OS=Rattus norvegicus GN=Flna PE=2 SV=1	125	1.43219	0.00134242
2	93.86	93.86	27.47	22.45	21.29	tr|E9PTI3|E9PTI3_RAT	Myosin-11 OS=Rattus norvegicus GN=Myh11 PE=4 SV=1	73	0.474242	0.00619339
3	87.7	87.7	22.59	18.91	18.12	tr|D4A115|D4A115_RAT	Protein Col6a3 OS=Rattus norvegicus GN=Col6a3 PE=4 SV=1	54	0.288403	0.328666
4	75.32	75.32	49.14	43.84	42.95	sp|P02454|CO1A1_RAT	Collagen alpha-1(I) chain OS=Rattus norvegicus GN=Col1a1 PE=1 SV=5	128	1.57036	0.558489
5	75.22	75.22	50.15	44.31	44.31	tr|F1LS40|F1LS40_RAT	Collagen alpha-2(I) chain OS=Rattus norvegicus GN=Col1a2 PE=4 SV=1	97	1.72187	0.723358
6	73.24	73.24	17.92	10.54	9.044	tr|Q6S3A0|Q6S3A0_RAT	Plectin OS=Rattus norvegicus GN=Plec PE=2 SV=1	39	1.01859	0.584229
7	72.42	72.42	23.06	18.33	15.45	sp|P16086|SPTN1_RAT	Spectrin alpha chain, non-erythrocytic 1 OS=Rattus norvegicus GN=Sptan1 PE=1 SV=2	38	1.61436	0.000209562
8	62.75	62.75	60.27	57.33	57.33	sp|P63259|ACTG_RAT	Actin, cytoplasmic 2 OS=Rattus norvegicus GN=Actg1 PE=1 SV=1	86	0.376704	0.0925042
9	62.16	62.16	21.17	17.39	14.48	tr|G3V852|G3V852_RAT	Protein Tln1 OS=Rattus norvegicus GN=Tln1 PE=4 SV=1	35	1.41906	0.0647014
10	57.88	57.88	39.49	33.3	31.52	sp|P85972|VINC_RAT	Vinculin OS=Rattus norvegicus GN=Vcl PE=1 SV=1	38	1.14815	0.137749
11	56.25	56.25	43.12	42.35	41.44	sp|P06761|GRP78_RAT	78 kDa glucose-regulated protein OS=Rattus norvegicus GN=Hspa5 PE=1 SV=1	45	1.45881	0.0450119
12	56.12	57.66	50.16	40.63	38.32	sp|P02770|ALBU_RAT	Serum albumin OS=Rattus norvegicus GN=Alb PE=1 SV=2	56	1.28233	0.353608
13	55.55	66.01	21.45	16.76	13.69	tr|D4A8D5|D4A8D5_RAT	Filamin, beta (Predicted) OS=Rattus norvegicus GN=Flnb PE=4 SV=1	33	1.49969	0.0469415
14	49.65	49.65	54.82	53.31	51.04	tr|G3V6D3|G3V6D3_RAT	ATP synthase subunit beta OS=Rattus norvegicus GN=Atp5b PE=3 SV=1	41	1.07647	0.617069
15	48.9	48.9	39.96	31.72	29.97	sp|Q9QXQ0|ACTN4_RAT	Alpha-actinin-4 OS=Rattus norvegicus GN=Actn4 PE=1 SV=2	31	1.02802	0.955701
16	47.6	47.6	30.65	29.37	28.09	sp|P05197|EF2_RAT	Elongation factor 2 OS=Rattus norvegicus GN=Eef2 PE=1 SV=4	29	0.369828	0.00481616
17	47.33	47.33	57.76	56.94	52.59	sp|Q10758|K2C8_RAT	Keratin, type II cytoskeletal 8 OS=Rattus norvegicus GN=Krt8 PE=1 SV=3	40	1.47231	0.0621481
18	45.11	45.11	45.67	41.34	41.34	sp|P62630|EF1A1_RAT	Elongation factor 1-alpha 1 OS=Rattus norvegicus GN=Eef1a1 PE=1 SV=1	32	0.515229	0.00177071
19	44.13	46.34	16.34	11.47	8.845	tr|G3V6S0|G3V6S0_RAT	Protein Sptbn1 OS=Rattus norvegicus GN=Sptbn1 PE=4 SV=1	24	1.44544	0.0264429
20	43.92	43.92	50.53	42.22	39.66	tr|Q6P725|Q6P725_RAT	Desmin OS=Rattus norvegicus GN=Des PE=2 SV=1	35	1.47231	0.372709
21	43.62	43.62	52.08	46.53	44.55	sp|P11598|PDIA3_RAT	Protein disulfide-isomerase A3 OS=Rattus norvegicus GN=Pdia3 PE=1 SV=2	31	1.38038	0.222944
22	43.21	43.21	19.4	15.2	14.67	sp|P07756|CPSM_RAT	Carbamoyl-phosphate synthase [ammonia], mitochondrial OS=Rattus norvegicus GN=Cps1 PE=1 SV=1	25	0.559758	0.00149071
23	42.58	42.63	33.74	28.9	28.17	tr|B5DFA0|B5DFA0_RAT	Protein Vil1 OS=Rattus norvegicus GN=Vil1 PE=2 SV=1	30	1.30617	0.220118
24	42.47	42.5	30.11	27.35	24.86	sp|P34058|HS90B_RAT	Heat shock protein HSP 90-beta OS=Rattus norvegicus GN=Hsp90ab1 PE=1 SV=4	35	0.870964	0.580275
25	42.25	42.25	22.41	17.74	16.66	tr|G3V9J1|G3V9J1_RAT	Protein LOC297568 OS=Rattus norvegicus GN=LOC297568 PE=4 SV=1	24	0.887156	0.86118
26	40.23	41.86	59.55	53.1	49.38	sp|Q63279|K1C19_RAT	Keratin, type I cytoskeletal 19 OS=Rattus norvegicus GN=Krt19 PE=1 SV=2	40	1.78649	0.0195269
27	40.21	46.28	43.81	36.69	35.76	sp|P63018|HSP7C_RAT	Heat shock cognate 71 kDa protein OS=Rattus norvegicus GN=Hspa8 PE=1 SV=1	41	0.903649	0.983306
28	38.94	40.78	10.81	5.577	4.156	sp|P38650|DYHC1_RAT	Cytoplasmic dynein 1 heavy chain 1 OS=Rattus norvegicus GN=Dync1h1 PE=1 SV=1	21	0.420727	1.68023e-05
29	38.54	38.54	31.32	21.56	19.61	tr|D3ZUL3|D3ZUL3_RAT	Protein Col6a1 OS=Rattus norvegicus GN=Col6a1 PE=4 SV=1	35	0.597035	0.164285
30	38.08	38.08	13.55	11.56	10.57	tr|D3Z8T9|D3Z8T9_RAT	Sucrase-isomaltase, intestinal OS=Rattus norvegicus GN=Si PE=4 SV=1	20	1.45881	0.0156659
31	37.7	50.36	19.6	12.85	11.55	tr|F1LNF0|F1LNF0_RAT	Protein Myh14 OS=Rattus norvegicus GN=Myh14 PE=4 SV=1	28	0.954993	0.649594
32	35.88	35.88	25.89	17.85	15.91	tr|F1LZF4|F1LZF4_RAT	Uncharacterized protein (Fragment) OS=Rattus norvegicus PE=4 SV=1	25	0.751623	0.504456
33	35.71	35.77	30.77	24.69	24.69	sp|P46462|TERA_RAT	Transitional endoplasmic reticulum ATPase OS=Rattus norvegicus GN=Vcp PE=1 SV=3	21	1.2942	0.148247
34	35.31	35.31	32.73	29.01	27.47	tr|F1M0K2|F1M0K2_RAT	Aconitate hydratase, mitochondrial (Fragment) OS=Rattus norvegicus GN=Aco2 PE=4 SV=1	22	0.751623	0.243797
35	34.15	34.24	35.09	28.45	28.45	tr|G3V7U4|G3V7U4_RAT	Lamin-B1 OS=Rattus norvegicus GN=Lmnb1 PE=3 SV=1	19	1.52757	0.0720217
36	33.89	53.78	19.59	13.83	12.3	tr|G3V6P7|G3V6P7_RAT	Myosin, heavy polypeptide 9, non-muscle OS=Rattus norvegicus GN=Myh9 PE=4 SV=1	32	0.496592	0.0492984
37	33.43	33.43	23.26	20.82	17.69	sp|P06685|AT1A1_RAT	Sodium/potassium-transporting ATPase subunit alpha-1 OS=Rattus norvegicus GN=Atp1a1 PE=1 SV=1	26	0.928966	0.105363
38	32.7	32.71	30.61	25.71	23.03	tr|Q6IMZ3|Q6IMZ3_RAT	Annexin OS=Rattus norvegicus GN=Anxa6 PE=2 SV=1	20	0.642688	0.135406
39	32.57	32.57	10.45	6.814	6.272	tr|D3ZJF8|D3ZJF8_RAT	Protein Fcgbp OS=Rattus norvegicus GN=Fcgbp PE=4 SV=1	17	0.981748	0.902295
40	32.37	32.37	44.44	42.64	39.64	tr|D3ZGY4|D3ZGY4_RAT	Glyceraldehyde-3-phosphate dehydrogenase OS=Rattus norvegicus GN=Gapdh-ps2 PE=3 SV=1	34	0.483059	0.259509
41	31.98	32.62	13.44	9.595	8.568	tr|D3ZFU9|D3ZFU9_RAT	Protein Mylk OS=Rattus norvegicus GN=Mylk PE=4 SV=1	21	0.625173	0.249227
42	31.71	32.17	31.45	25.95	23.97	tr|G3V826|G3V826_RAT	Transketolase OS=Rattus norvegicus GN=Tkt PE=4 SV=1	19	0.353183	0.010371
43	31.7	32.34	53.99	53.99	45.71	tr|F8WG97|F8WG97_RAT	Galectin-4 OS=Rattus norvegicus GN=Lgals4 PE=4 SV=1	33	0.691831	0.388897
44	31.67	32.79	43.42	39.88	34.38	sp|P04785|PDIA1_RAT	Protein disulfide-isomerase OS=Rattus norvegicus GN=P4hb PE=1 SV=2	21	1.28233	0.0457749
45	31.37	31.37	43.16	39.31	36.61	tr|G3V7I5|G3V7I5_RAT	Aldehyde dehydrogenase X, mitochondrial OS=Rattus norvegicus GN=Aldh1b1 PE=3 SV=1	17	1.13763	0.574088
46	31.12	31.12	52.76	47.96	40.77	sp|P16617|PGK1_RAT	Phosphoglycerate kinase 1 OS=Rattus norvegicus GN=Pgk1 PE=1 SV=2	19	0.972747	0.790202
47	31.1	31.1	36.45	33.26	30.52	sp|P04182|OAT_RAT	Ornithine aminotransferase, mitochondrial OS=Rattus norvegicus GN=Oat PE=1 SV=1	20	0.963829	0.224753
48	31.08	31.08	20.94	17.67	15.12	tr|F1LMP2|F1LMP2_RAT	Serotransferrin (Fragment) OS=Rattus norvegicus GN=Tf PE=4 SV=1	21	0.912011	0.868837
49	31.05	31.05	54.83	51.7	49.43	tr|F1LNF1|F1LNF1_RAT	Heterogeneous nuclear ribonucleoproteins A2/B1 (Fragment) OS=Rattus norvegicus GN=Hnrnpa2b1 PE=4 SV=1	29	1.35519	0.241546
50	30.54	30.54	56.93	53.61	46.39	sp|P04642|LDHA_RAT	L-lactate dehydrogenase A chain OS=Rattus norvegicus GN=Ldha PE=1 SV=1	26	0.47863	0.0857475
51	30.47	30.47	48.76	45.39	43.37	tr|G3V7C6|G3V7C6_RAT	Protein Tubb2c OS=Rattus norvegicus GN=Tubb4b PE=3 SV=1	27	0.981748	0.995776
52	29.99	29.99	38.16	30.2	29.29	tr|F1LP05|F1LP05_RAT	ATP synthase subunit alpha OS=Rattus norvegicus GN=Atp5a1 PE=3 SV=1	25	0.946237	0.499676
53	29.76	58.3	60.74	58.62	58.62	sp|P62738|ACTA_RAT	Actin, aortic smooth muscle OS=Rattus norvegicus GN=Acta2 PE=1 SV=1	84	0.937562	0.284131
54	29.29	29.29	33.06	23.73	23.73	tr|F1M3D3|F1M3D3_RAT	Protein Hnrpm OS=Rattus norvegicus GN=Hnrnpm PE=4 SV=1	19	0.963829	0.577739
55	28.92	28.92	33.08	31.13	27.07	tr|G3V8L3|G3V8L3_RAT	Lamin A, isoform CRA_b OS=Rattus norvegicus GN=Lmna PE=3 SV=1	16	1.64437	0.0262507
56	28.48	31.08	27.47	23.96	19.78	tr|D3ZYR8|D3ZYR8_RAT	Chloride channel calcium activated 3 (Predicted) OS=Rattus norvegicus GN=Clca1 PE=4 SV=1	18	0.92045	0.514307
57	28.12	28.26	36.23	25.33	24.59	tr|F1M953|F1M953_RAT	Stress-70 protein, mitochondrial OS=Rattus norvegicus GN=Hspa9 PE=3 SV=1	20	1.35519	0.175331
58	28.11	31.22	23.01	18.28	16.67	sp|Q66HD0|ENPL_RAT	Endoplasmin OS=Rattus norvegicus GN=Hsp90b1 PE=1 SV=2	22	1	0.78445
59	27.94	27.94	8.219	5.67	4.611	tr|F1LTJ5|F1LTJ5_RAT	Uncharacterized protein (Fragment) OS=Rattus norvegicus PE=4 SV=1	14	0.524808	0.22589
60	27.1	27.1	31.57	30.46	30.46	tr|D4A8I4|D4A8I4_RAT	Tubulin alpha-1B chain OS=Rattus norvegicus GN=Tuba1b PE=3 SV=1	20
61	26.63	26.63	36.28	36.28	34.38	sp|P19945|RLA0_RAT	60S acidic ribosomal protein P0 OS=Rattus norvegicus GN=Rplp0 PE=1 SV=2	14	0.809096	0.217937
62	26.28	26.28	22	14.35	9.543	tr|Q3KRF2|Q3KRF2_RAT	High density lipoprotein binding protein OS=Rattus norvegicus GN=Hdlbp PE=2 SV=1	13	1.00925	0.746181
63	26.06	26.06	27.4	24.26	21.47	sp|P63039|CH60_RAT	60 kDa heat shock protein, mitochondrial OS=Rattus norvegicus GN=Hspd1 PE=1 SV=1	21	1.39316	0.136407
64	25.82	25.83	44.08	40.83	40.83	sp|P04636|MDHM_RAT	Malate dehydrogenase, mitochondrial OS=Rattus norvegicus GN=Mdh2 PE=1 SV=2	19	0.636796	0.127264
65	25.8	25.8	45.33	38.74	36.26	tr|Q66HT1|Q66HT1_RAT	Fructose-bisphosphate aldolase OS=Rattus norvegicus GN=Aldob PE=2 SV=1	23	0.824138	0.447713
66	25.57	27.72	30.64	24.42	21.62	tr|G3V6T7|G3V6T7_RAT	Protein disulfide isomerase associated 4 OS=Rattus norvegicus GN=Pdia4 PE=3 SV=1	17	1.7378	0.0204463
67	25.51	25.51	36.7	32.51	32.51	tr|Q6P3V8|Q6P3V8_RAT	Eukaryotic translation initiation factor 4A1 OS=Rattus norvegicus GN=Eif4a1 PE=2 SV=1	17	0.534564	0.0206498
68	25.37	25.37	59.8	59.8	59.8	sp|Q63716|PRDX1_RAT	Peroxiredoxin-1 OS=Rattus norvegicus GN=Prdx1 PE=1 SV=1	21	1.22462	0.319444
69	25.23	26.29	11.04	9.837	7.604	tr|G3V7Q7|G3V7Q7_RAT	IQ motif containing GTPase activating protein 1 (Predicted), isoform CRA_b OS=Rattus norvegicus GN=Iqgap1 PE=4 SV=1	13	0.510505	0.0120296
70	24.91	24.91	49.08	44.88	44.88	sp|P07335|KCRB_RAT	Creatine kinase B-type OS=Rattus norvegicus GN=Ckb PE=1 SV=2	24	1.59956	0.0858591
71	24.77	24.77	29.38	28.44	28.44	sp|P11980-2|KPYM_RAT	Isoform M2 of Pyruvate kinase isozymes M1/M2 OS=Rattus norvegicus GN=Pkm	17	0.698232	0.363183
72	24.7	24.75	17.4	12.89	11.45	tr|Q5U302|Q5U302_RAT	Catenin (Cadherin associated protein), alpha 1 OS=Rattus norvegicus GN=Ctnna1 PE=2 SV=1	12	1.61436	0.0883481
73	24.56	24.56	23.06	17.17	15.41	tr|Q6IMY8|Q6IMY8_RAT	Heterogeneous nuclear ribonucleoprotein U OS=Rattus norvegicus GN=Hnrnpu PE=2 SV=1	15	0.847227	0.0574396
74	24.47	24.47	44.11	44.11	42.09	sp|Q08290|CNN1_RAT	Calponin-1 OS=Rattus norvegicus GN=Cnn1 PE=2 SV=1	23	1.31826	0.370057
75	24.37	24.37	24.25	17.82	15.52	tr|F1LM41|F1LM41_RAT	Major vault protein (Fragment) OS=Rattus norvegicus GN=Mvp PE=4 SV=1	15	0.981748	0.876395
76	24.25	24.25	18.22	12.91	12.11	tr|F1LN18|F1LN18_RAT	Hypoxia up-regulated protein 1 OS=Rattus norvegicus GN=Hyou1 PE=3 SV=1	13	1.02802	0.40089
77	23.64	24.48	21.23	20.71	16.51	sp|Q64428|ECHA_RAT	Trifunctional enzyme subunit alpha, mitochondrial OS=Rattus norvegicus GN=Hadha PE=1 SV=2	13	0.534564	0.0246971
78	23.63	23.63	16.61	14.7	10.86	tr|D4A702|D4A702_RAT	Protein Synpo2 OS=Rattus norvegicus GN=Synpo2 PE=4 SV=1	13	1.33045	0.1976
79	23.14	23.14	65.67	59.7	57.21	sp|P31232|TAGL_RAT	Transgelin OS=Rattus norvegicus GN=Tagln PE=1 SV=2	30	1.69044	0.0238606
80	23	23	49.66	49.66	49.66	sp|P02091|HBB1_RAT	Hemoglobin subunit beta-1 OS=Rattus norvegicus GN=Hbb PE=1 SV=3	27	1.1695	0.726631
81	22.77	22.79	37.58	32.55	32.55	sp|Q09073|ADT2_RAT	ADP/ATP translocase 2 OS=Rattus norvegicus GN=Slc25a5 PE=1 SV=3	17	0.322107	0.00919441
82	22.72	22.72	19.76	15.31	14.55	tr|D4ABA5|D4ABA5_RAT	Protein Smtn OS=Rattus norvegicus GN=Smtn PE=4 SV=1	13	0.831764	0.462009
83	22.63	22.63	17.01	9.91	8.657	tr|F1M779|F1M779_RAT	Clathrin heavy chain 1 OS=Rattus norvegicus GN=Cltc PE=4 SV=1	13	0.452898	0.0216997
84	22.6	23.18	34.75	26.57	23.43	sp|Q9EPH8|PABP1_RAT	Polyadenylate-binding protein 1 OS=Rattus norvegicus GN=Pabpc1 PE=2 SV=1	14	1.58489	0.178902
85	22.52	22.66	32.48	24.82	21.72	tr|D4ACB8|D4ACB8_RAT	Chaperonin subunit 8 (Theta) (Predicted), isoform CRA_a OS=Rattus norvegicus GN=Cct8 PE=3 SV=1	13	1	0.839405
86	22.37	22.37	17.08	13.28	12.5	tr|D4A1W8|D4A1W8_RAT	Microsomal triglyceride transfer protein OS=Rattus norvegicus GN=Mttp PE=4 SV=1	14	0.751623	0.221201
87	22.26	22.26	31.75	26.11	26.11	sp|Q9EQS0|TALDO_RAT	Transaldolase OS=Rattus norvegicus GN=Taldo1 PE=1 SV=2	13	0.642688	0.252682
88	22.14	22.82	12.5	9.411	7.112	sp|Q5SGE0|LPPRC_RAT	Leucine-rich PPR motif-containing protein, mitochondrial OS=Rattus norvegicus GN=Lrpprc PE=1 SV=1	15	0.483059	0.015665
89	22.09	22.09	47.74	47.74	45.27	sp|P62909|RS3_RAT	40S ribosomal protein S3 OS=Rattus norvegicus GN=Rps3 PE=1 SV=1	12	0.704693	0.233791
90	22	22.09	24.96	15.73	15.56	tr|F1M390|F1M390_RAT	Ezrin (Fragment) OS=Rattus norvegicus GN=Ezr PE=4 SV=1	12	1.38038	0.46286
91	21.8	21.81	8.034	6.096	5.612	tr|G3V7W2|G3V7W2_RAT	Fibronectin OS=Rattus norvegicus GN=Fn1 PE=4 SV=1	14	0.92045	0.418456
92	21.8	21.8	32.74	31.64	28.54	sp|P85834|EFTU_RAT	Elongation factor Tu, mitochondrial OS=Rattus norvegicus GN=Tufm PE=1 SV=1	10	0.937562	0.932631
93	21.73	21.73	22.83	14.01	12.61	tr|Q5U328|Q5U328_RAT	Nucleolin OS=Rattus norvegicus GN=Ncl PE=2 SV=1	13	1.36773	0.267746
94	21.58	41.94	31.62	25.93	24.18	tr|Q6T487|Q6T487_RAT	Alpha-actinin-1 OS=Rattus norvegicus GN=Actn1 PE=2 SV=1	28	0.49204	0.14692
95	21.48	21.5	22.48	19.5	19.5	sp|P07153|RPN1_RAT	Dolichyl-diphosphooligosaccharide--protein glycosyltransferase subunit 1 OS=Rattus norvegicus GN=Rpn1 PE=2 SV=1	12	0.847227	0.48852
96	21.41	21.41	21.76	14.72	14.72	tr|D3ZIE9|D3ZIE9_RAT	Protein Aldh18a1 OS=Rattus norvegicus GN=Aldh18a1 PE=4 SV=1	11	0.679204	0.0722683
97	21.27	21.27	19.15	17.68	17.68	tr|Q499P2|Q499P2_RAT	Leukotriene A-4 hydrolase OS=Rattus norvegicus GN=Lta4h PE=2 SV=1	12	0.731139	0.377107
98	21.27	21.27	28.85	27.75	23.13	tr|Q9JKB7|Q9JKB7_RAT	Guanine deaminase OS=Rattus norvegicus GN=Gda PE=2 SV=1	13	1.34276	0.181709
99	21.15	21.15	38.62	33.23	33.23	sp|O88989|MDHC_RAT	Malate dehydrogenase, cytoplasmic OS=Rattus norvegicus GN=Mdh1 PE=1 SV=3	12	1.04713	0.501419
100	21.14	21.23	28.04	22.22	19.75	tr|D3ZVR9|D3ZVR9_RAT	Protein Pgm5 OS=Rattus norvegicus GN=Pgm5 PE=3 SV=1	11	0.92045	0.928788
101	21.08	21.08	25.63	20.97	19.89	sp|P10860|DHE3_RAT	Glutamate dehydrogenase 1, mitochondrial OS=Rattus norvegicus GN=Glud1 PE=1 SV=2	15	1.1695	0.334453
102	20.96	20.96	20	8.981	7.623	tr|F1M5X1|F1M5X1_RAT	Protein Rrbp1 (Fragment) OS=Rattus norvegicus GN=Rrbp1 PE=4 SV=1	13	1.00925	0.458057
103	20.86	20.86	65.38	65.38	65.38	sp|Q9Z144|LEG2_RAT	Galectin-2 OS=Rattus norvegicus GN=Lgals2 PE=2 SV=1	18	2.31206	0.0357055
104	20.77	21.04	10.22	5.7	3.719	tr|F1LMV6|F1LMV6_RAT	Protein Dsp OS=Rattus norvegicus GN=Dsp PE=4 SV=1	11	1.02802	0.631123
105	20.66	20.72	13.33	8.943	8.943	tr|F1LQS6|F1LQS6_RAT	Xanthine dehydrogenase/oxidase (Fragment) OS=Rattus norvegicus GN=Xdh PE=4 SV=1	13	0.413047	0.021828
106	20.53	20.53	18.04	14.29	13.3	tr|D3ZHX7|D3ZHX7_RAT	Microtubule-associated protein OS=Rattus norvegicus GN=Map4 PE=4 SV=1	12	1.45881	0.0421254
107	20.52	21.63	23.81	21.11	18.57	tr|F1LQQ6|F1LQQ6_RAT	Protein Pls1 OS=Rattus norvegicus GN=Pls1 PE=4 SV=1	14	0.990832	0.881779
108	20.34	25.11	37.83	33.57	30.97	sp|Q5BJY9|K1C18_RAT	Keratin, type I cytoskeletal 18 OS=Rattus norvegicus GN=Krt18 PE=1 SV=3	24	1.02802	0.726859
109	20.22	20.43	15.41	11.91	11.91	sp|Q5U300|UBA1_RAT	Ubiquitin-like modifier-activating enzyme 1 OS=Rattus norvegicus GN=Uba1 PE=1 SV=1	12	1	0.753243
110	20.2	20.21	13.81	10.96	9.208	tr|Q5BJZ3|Q5BJZ3_RAT	Nicotinamide nucleotide transhydrogenase OS=Rattus norvegicus GN=Nnt PE=2 SV=1	10	0.322107	0.00385747
111	20.06	20.06	25.91	24.01	24.01	tr|F1LSB9|F1LSB9_RAT	Lipoma-preferred partner homolog OS=Rattus norvegicus GN=Lpp PE=4 SV=1	12	1.69044	0.344343
112	20.01	31.24	29.13	25.86	24.14	tr|F1LPF5|F1LPF5_RAT	Heat shock 70 kDa protein 1A/1B (Fragment) OS=Rattus norvegicus GN=Hspa1a PE=3 SV=1	19	3.37287	0.000279101
113	20	20.77	38.28	34.45	34.45	tr|G3V900|G3V900_RAT	Fructose-bisphosphate aldolase OS=Rattus norvegicus GN=Aldoa PE=3 SV=1	15	0.990832	0.552172
114	20	20.35	18.29	16.78	16.09	sp|Q66HF1|NDUS1_RAT	NADH-ubiquinone oxidoreductase 75 kDa subunit, mitochondrial OS=Rattus norvegicus GN=Ndufs1 PE=1 SV=1	10	0.990832	0.904469
115	19.96	20.52	31.07	21.47	20.53	tr|G3V9E3|G3V9E3_RAT	Caldesmon 1, isoform CRA_b OS=Rattus norvegicus GN=Cald1 PE=4 SV=1	11	1.36773	0.626107
116	19.96	19.96	50.61	46.96	46.96	sp|P00770|MCPT2_RAT	Mast cell protease 2 OS=Rattus norvegicus GN=Mcpt2 PE=1 SV=1	14	0.625173	0.677301
117	19.95	24.02	27.75	25.63	23.31	sp|P11884|ALDH2_RAT	Aldehyde dehydrogenase, mitochondrial OS=Rattus norvegicus GN=Aldh2 PE=1 SV=1	13	0.954993	0.668538
118	19.85	25.63	34.73	31.93	28.9	sp|P25030|K1C20_RAT	Keratin, type I cytoskeletal 20 OS=Rattus norvegicus GN=Krt20 PE=2 SV=2	28	1.33045	0.57279
119	19.57	19.83	11.07	7.6	6.8	sp|Q63041|A1M_RAT	Alpha-1-macroglobulin OS=Rattus norvegicus GN=A1m PE=1 SV=1	11	0.903649	0.184646
120	19.56	19.62	29.09	22.54	21.19	sp|Q68FS4|AMPL_RAT	Cytosol aminopeptidase OS=Rattus norvegicus GN=Lap3 PE=1 SV=1	10	1.44544	0.102721
121	19.49	28.31	33.48	33.48	30.47	tr|G3V8C3|G3V8C3_RAT	Vimentin OS=Rattus norvegicus GN=Vim PE=3 SV=1	22	1.1272	0.464569
122	19.42	19.5	34.77	27.21	25.92	sp|P61980|HNRPK_RAT	Heterogeneous nuclear ribonucleoprotein K OS=Rattus norvegicus GN=Hnrnpk PE=1 SV=1	14	1.15878	0.0546441
123	19.33	19.33	35.48	29.49	26.5	sp|P04764|ENOA_RAT	Alpha-enolase OS=Rattus norvegicus GN=Eno1 PE=1 SV=4	13	1.21339	0.495252
124	19.32	19.37	17.48	16.5	14.83	tr|E9PU64|E9PU64_RAT	Protein Scin OS=Rattus norvegicus GN=Scin PE=4 SV=1	12	1.69044	0.0588957
125	19.28	20.24	10.25	7.503	6.128	tr|F1LN42|F1LN42_RAT	Protein Tns1 (Fragment) OS=Rattus norvegicus GN=Tns1 PE=4 SV=1	11	1.01859	0.555757
126	19.19	19.39	11.84	7.074	5.727	tr|F1LW91|F1LW91_RAT	Protein Numa1 (Fragment) OS=Rattus norvegicus GN=Numa1 PE=4 SV=1	9	1.00925	0.918114
127	19.1	19.15	20.87	14.34	13.06	tr|F8WFK3|F8WFK3_RAT	Gelsolin OS=Rattus norvegicus GN=Gsn PE=4 SV=1	12	1.40605	0.324563
128	18.76	18.76	38.27	34.66	34.66	sp|P47727|CBR1_RAT	Carbonyl reductase [NADPH] 1 OS=Rattus norvegicus GN=Cbr1 PE=1 SV=2	10	1.22462	0.341857
129	18.59	18.59	25.5	20.92	17.06	sp|Q6P502|TCPG_RAT	T-complex protein 1 subunit gamma OS=Rattus norvegicus GN=Cct3 PE=1 SV=1	10	0.564937	0.143746
130	18.58	18.58	39.84	33.51	31.93	sp|Q4G075|ILEUA_RAT	Leukocyte elastase inhibitor A OS=Rattus norvegicus GN=Serpinb1a PE=2 SV=1	13	1.11686	0.653782
131	18.39	18.39	53.64	50.99	50.99	tr|G3V9A2|G3V9A2_RAT	Myosin light polypeptide 6 OS=Rattus norvegicus GN=Myl6 PE=4 SV=1	18	1.34276	0.372514
132	18.35	18.35	26.7	22.84	19.71	sp|O35814|STIP1_RAT	Stress-induced-phosphoprotein 1 OS=Rattus norvegicus GN=Stip1 PE=1 SV=1	10	1.43219	0.0331361
133	18.24	18.24	32.23	27.62	25.06	sp|P02651|APOA4_RAT	Apolipoprotein A-IV OS=Rattus norvegicus GN=Apoa4 PE=2 SV=2	9	1.07647	0.492111
134	18.2	34.85	13.48	7.947	7.315	tr|D3ZZ63|D3ZZ63_RAT	Protein Flnc OS=Rattus norvegicus GN=Flnc PE=4 SV=1	18	1.57036	0.384237
135	18.11	18.11	43.35	38.4	35.74	sp|Q99MZ8|LASP1_RAT	LIM and SH3 domain protein 1 OS=Rattus norvegicus GN=Lasp1 PE=1 SV=1	10	1.03753	0.364968
136	18.08	18.16	52.63	48.68	48.68	sp|Q05982|NDKA_RAT	Nucleoside diphosphate kinase A OS=Rattus norvegicus GN=Nme1 PE=1 SV=1	12	1.20226	0.718536
137	18.05	18.2	7.545	4.591	3.872	sp|P12785|FAS_RAT	Fatty acid synthase OS=Rattus norvegicus GN=Fasn PE=1 SV=3	9	0.340408	0.00559878
138	18.01	18.01	23.89	21.02	21.02	sp|P32551|QCR2_RAT	Cytochrome b-c1 complex subunit 2, mitochondrial OS=Rattus norvegicus GN=Uqcrc2 PE=1 SV=2	9	0.724436	0.13566
139	17.95	17.95	14.74	8.127	6.614	tr|G3V9G5|G3V9G5_RAT	Protein Synm OS=Rattus norvegicus GN=Synm PE=3 SV=1	9	1.47231	0.199967
140	17.94	17.94	11.65	9.008	9.008	tr|F1M4W3|F1M4W3_RAT	Protein LOC100364455 (Fragment) OS=Rattus norvegicus GN=LOC290704 PE=4 SV=1	9	1.07647	0.309984
141	17.82	17.82	27.18	19.69	19.69	sp|Q99PF5|FUBP2_RAT	Far upstream element-binding protein 2 OS=Rattus norvegicus GN=Khsrp PE=1 SV=1	12	1.78649	0.252764
142	17.72	17.72	62.68	61.97	61.97	sp|P01946|HBA_RAT	Hemoglobin subunit alpha-1/2 OS=Rattus norvegicus GN=Hba1 PE=1 SV=3	25	1.18032	0.766619
143	17.63	17.63	24.49	20.82	19.45	sp|Q68FR6|EF1G_RAT	Elongation factor 1-gamma OS=Rattus norvegicus GN=Eef1g PE=1 SV=3	9	0.731139	0.0889805
144	17.58	17.88	16.86	12.4	10.47	sp|Q10728|MYPT1_RAT	Protein phosphatase 1 regulatory subunit 12A OS=Rattus norvegicus GN=Ppp1r12a PE=1 SV=2	11
145	17.3	17.3	22.69	20.17	17.65	sp|Q5FVM4|NONO_RAT	Non-POU domain-containing octamer-binding protein OS=Rattus norvegicus GN=Nono PE=2 SV=3	10	0.937562	0.521644
146	17.25	17.25	11.62	9.218	9.218	tr|D3ZJN5|D3ZJN5_RAT	Sarcoplasmic/endoplasmic reticulum calcium ATPase 2 OS=Rattus norvegicus GN=Atp2a2 PE=3 SV=1	9	0.758578	0.266545
147	17.24	17.24	61.42	61.42	56.69	sp|P02692|FABPL_RAT	Fatty acid-binding protein, liver OS=Rattus norvegicus GN=Fabp1 PE=1 SV=1	14	1.41906	0.131205
148	17.2	17.2	26.55	25.14	25.14	sp|Q01129|PGS2_RAT	Decorin OS=Rattus norvegicus GN=Dcn PE=1 SV=1	17	0.613762	0.0490954
149	17.04	17.04	15.22	11.41	10.63	tr|F1LNH3|F1LNH3_RAT	Protein Col6a2 (Fragment) OS=Rattus norvegicus GN=Col6a2 PE=4 SV=1	12	0.831764	0.655053
150	17	17	17.11	12.87	10.53	tr|D3ZW20|D3ZW20_RAT	Long-chain-fatty-acid--CoA ligase 5 OS=Rattus norvegicus GN=Acsl5 PE=4 SV=1	8	0.648634	0.0464125
151	16.97	16.97	30.63	25.7	25.7	tr|Q63607|Q63607_RAT	Alpha-tropomyosin 3 OS=Rattus norvegicus GN=Tpm1 PE=2 SV=1	15	1.31826	0.529731
152	16.86	16.86	22.28	16.26	14.63	tr|Q6AYI1|Q6AYI1_RAT	DEAD (Asp-Glu-Ala-Asp) box polypeptide 5 OS=Rattus norvegicus GN=Ddx5 PE=2 SV=1	10	1.07647	0.878078
153	16.81	16.81	43.6	43.6	43.6	sp|P18666|ML12B_RAT	Myosin regulatory light chain 12B OS=Rattus norvegicus GN=Myl12b PE=1 SV=3	16
154	16.78	16.84	25.56	11.79	10.07	tr|G3V8I6|G3V8I6_RAT	Epithelial protein lost in neoplasm OS=Rattus norvegicus GN=Lima1 PE=4 SV=1	8	0.92045	0.931093
155	16.78	16.78	32.52	32.52	25.88	sp|Q62733|LAP2_RAT	Lamina-associated polypeptide 2, isoform beta OS=Rattus norvegicus GN=Tmpo PE=1 SV=3	10	1.14815	0.244443
156	16.55	16.55	25.39	15.66	14.81	tr|F1LRP0|F1LRP0_RAT	Mitochondrial inner membrane protein OS=Rattus norvegicus GN=Immt PE=4 SV=1	9	0.981748	0.919676
157	16.53	16.54	29.96	24.47	24.47	sp|Q08163|CAP1_RAT	Adenylyl cyclase-associated protein 1 OS=Rattus norvegicus GN=Cap1 PE=1 SV=3	10	0.903649	0.640216
158	16.46	16.46	39.86	32.61	32.61	tr|D3ZNH4|D3ZNH4_RAT	Histone H2B OS=Rattus norvegicus GN=Hist1h2bo PE=3 SV=1	17	1.00925	0.962644
159	16.4	16.4	39.75	35.56	35.56	sp|Q4FZY0|EFHD2_RAT	EF-hand domain-containing protein D2 OS=Rattus norvegicus GN=Efhd2 PE=1 SV=1	10	1.40605	0.11991
160	16.34	16.34	41.63	37.14	35.1	sp|P63102|1433Z_RAT	14-3-3 protein zeta/delta OS=Rattus norvegicus GN=Ywhaz PE=1 SV=1	10	1.03753	0.548967
161	16.15	16.15	18.85	15.16	11.83	sp|Q68FQ0|TCPE_RAT	T-complex protein 1 subunit epsilon OS=Rattus norvegicus GN=Cct5 PE=1 SV=1	8	1.00925	0.800794
162	16.1	16.12	39.76	37.35	34.14	tr|Q6P9V7|Q6P9V7_RAT	Proteasome (Prosome, macropain) activator subunit 1 OS=Rattus norvegicus GN=Psme1 PE=2 SV=1	11	1.58489	0.0609572
163	16	17.31	34.45	30.86	23.92	tr|Q5BJT9|Q5BJT9_RAT	Creatine kinase U-type, mitochondrial OS=Rattus norvegicus GN=Ckmt1b PE=2 SV=1	10	0.679204	0.266628
164	15.95	15.95	16.24	14.14	12.24	tr|G3V624|G3V624_RAT	Coronin OS=Rattus norvegicus GN=Coro1c PE=3 SV=1	8	0.461318	0.0757578
165	15.81	15.81	15.62	11	10.78	sp|Q66X93|SND1_RAT	Staphylococcal nuclease domain-containing protein 1 OS=Rattus norvegicus GN=Snd1 PE=2 SV=1	8	0.731139	0.0289448
166	15.81	15.81	29.2	29.2	21.24	sp|Q07936|ANXA2_RAT	Annexin A2 OS=Rattus norvegicus GN=Anxa2 PE=1 SV=2	11	0.666807	0.136318
167	15.8	17.42	24.26	14.55	14.55	sp|Q32PX7|FUBP1_RAT	Far upstream element-binding protein 1 OS=Rattus norvegicus GN=Fubp1 PE=1 SV=1	9	1.59956	0.368686
168	15.78	15.78	27.74	21.41	16.3	sp|P17475|A1AT_RAT	Alpha-1-antiproteinase OS=Rattus norvegicus GN=Serpina1 PE=1 SV=2	8	1.97697	0.0538914
169	15.76	15.86	26.16	15.58	15.58	sp|Q7TPB1|TCPD_RAT	T-complex protein 1 subunit delta OS=Rattus norvegicus GN=Cct4 PE=1 SV=3	9	0.981748	0.861552
170	15.75	15.75	22.57	17.48	16.15	sp|P56574|IDHP_RAT	Isocitrate dehydrogenase [NADP], mitochondrial OS=Rattus norvegicus GN=Idh2 PE=1 SV=2	9	0.903649	0.703497
171	15.56	15.56	17.9	12.82	12.82	sp|P55281|CAD17_RAT	Cadherin-17 OS=Rattus norvegicus GN=Cdh17 PE=2 SV=1	11	1.19124	0.374471
172	15.54	15.98	12.57	8.967	6.886	tr|G3V699|G3V699_RAT	Protein transport protein Sec31A OS=Rattus norvegicus GN=Sec31a PE=4 SV=1	8	1.01859	0.521719
173	15.52	15.81	12.57	10.79	9.371	tr|G3V6Y6|G3V6Y6_RAT	Phosphorylase OS=Rattus norvegicus GN=Pygb PE=3 SV=1	8	0.49204	0.0412167
174	15.41	17.51	25.18	17.1	16.18	tr|D4AC23|D4AC23_RAT	Protein Cct7 OS=Rattus norvegicus GN=Cct7 PE=3 SV=1	10	0.642688	0.0799299
175	15.38	15.43	30	26.36	18.64	sp|Q63081|PDIA6_RAT	Protein disulfide-isomerase A6 OS=Rattus norvegicus GN=Pdia6 PE=1 SV=2	7	0.937562	0.576016
176	15.17	15.17	46.01	44.6	38.5	sp|Q06647|ATPO_RAT	ATP synthase subunit O, mitochondrial OS=Rattus norvegicus GN=Atp5o PE=1 SV=1	9	0.937562	0.520284
177	15.07	33.14	24.01	21.15	17.74	sp|P82995|HS90A_RAT	Heat shock protein HSP 90-alpha OS=Rattus norvegicus GN=Hsp90aa1 PE=1 SV=3	25	1.08643	0.571186
178	15.06	15.14	32.2	23.73	18.64	sp|P05544|SPA3L_RAT	Serine protease inhibitor A3L OS=Rattus norvegicus GN=Serpina3l PE=1 SV=3	9	1.2942	0.310219
179	14.97	14.97	28.38	21.22	21.22	sp|Q9EQP5|PRELP_RAT	Prolargin OS=Rattus norvegicus GN=Prelp PE=2 SV=1	9	0.724436	0.466648
180	14.97	14.97	48.95	42.66	42.66	tr|D3ZXP3|D3ZXP3_RAT	Histone H2A OS=Rattus norvegicus GN=H2afx PE=3 SV=1	10	1.38038	0.511907
181	14.96	17.06	27.5	23.54	17.92	tr|D3Z8Y5|D3Z8Y5_RAT	Fibrinogen beta chain OS=Rattus norvegicus GN=Fgb PE=4 SV=1	9	0.895365	0.345521
182	14.91	14.91	22.78	21.2	19.3	sp|P07943|ALDR_RAT	Aldose reductase OS=Rattus norvegicus GN=Akr1b1 PE=1 SV=3	8	0.831764	0.301614
183	14.88	14.88	23.82	14.91	14.27	tr|D3ZZZ9|D3ZZZ9_RAT	Catenin (Cadherin associated protein), delta 1 (Predicted), isoform CRA_a OS=Rattus norvegicus GN=Ctnnd1 PE=4 SV=1	12	1.0666	0.586877
184	14.75	14.84	7.342	3.944	3.623	tr|F1LQC3|F1LQC3_RAT	Collagen alpha-1(XII) chain OS=Rattus norvegicus GN=Col12a1 PE=4 SV=1	9	1.18032	0.541998
185	14.71	14.72	8.027	4.916	4.916	tr|F1MAA7|F1MAA7_RAT	Protein Lamc1 OS=Rattus norvegicus GN=Lamc1 PE=4 SV=1	8	0.990832	0.797853
186	14.66	14.66	20.63	17.05	15.16	sp|Q60587|ECHB_RAT	Trifunctional enzyme subunit beta, mitochondrial OS=Rattus norvegicus GN=Hadhb PE=1 SV=1	7	0.401791	0.0138871
187	14.55	14.55	21.89	14.16	11.16	tr|G3V936|G3V936_RAT	Citrate synthase OS=Rattus norvegicus GN=Cs PE=3 SV=1	7	0.366438	0.0153322
188	14.42	14.42	17.72	16.4	12.3	tr|D4A8G5|D4A8G5_RAT	Protein Tgfbi OS=Rattus norvegicus GN=Tgfbi PE=4 SV=1	8	0.510505	0.201164
189	14.41	14.41	19.77	15.55	15.55	tr|G3V6J0|G3V6J0_RAT	4-trimethylaminobutyraldehyde dehydrogenase OS=Rattus norvegicus GN=Aldh9a1 PE=3 SV=1	8	0.625173	0.32991
190	14.39	14.39	19.37	16.25	16.25	sp|Q68FY0|QCR1_RAT	Cytochrome b-c1 complex subunit 1, mitochondrial OS=Rattus norvegicus GN=Uqcrc1 PE=1 SV=1	13	0.946237	0.504945
191	14.24	14.24	11.92	9.223	7.876	sp|P15684|AMPN_RAT	Aminopeptidase N OS=Rattus norvegicus GN=Anpep PE=1 SV=2	8	1.5417	0.284224
192	14.16	14.16	33.23	29.54	27.08	sp|P51635|AK1A1_RAT	Alcohol dehydrogenase [NADP(+)] OS=Rattus norvegicus GN=Akr1a1 PE=1 SV=2	9	0.963829	0.899707
193	14.13	14.13	16.29	16.29	13.68	tr|B5DFH4|B5DFH4_RAT	Papss2 protein OS=Rattus norvegicus GN=Papss2 PE=2 SV=1	7	0.253513	0.00171206
194	14.06	14.19	29.98	23.02	23.02	tr|Q5RJR9|Q5RJR9_RAT	Serine (Or cysteine) proteinase inhibitor, clade H, member 1, isoform CRA_b OS=Rattus norvegicus GN=Serpinh1 PE=2 SV=1	7	0.717794	0.56134
195	14.04	14.07	59.76	42.07	42.07	sp|P10111|PPIA_RAT	Peptidyl-prolyl cis-trans isomerase A OS=Rattus norvegicus GN=Ppia PE=1 SV=2	7	1	0.901573
196	14	14.36	47.02	44.05	41.07	tr|G3V7Y3|G3V7Y3_RAT	ATP synthase subunit delta, mitochondrial OS=Rattus norvegicus GN=Atp5d PE=3 SV=1	10	1.34276	0.590588
197	14	14	22.76	18.38	18.38	sp|Q9Z1Z9|PDLI7_RAT	PDZ and LIM domain protein 7 OS=Rattus norvegicus GN=Pdlim7 PE=1 SV=1	10	0.751623	0.328838
198	14	14	26.44	23.05	23.05	sp|P38983|RSSA_RAT	40S ribosomal protein SA OS=Rattus norvegicus GN=Rpsa PE=1 SV=3	7	0.981748	0.839746
199	14	14	38.53	34.86	34.86	sp|O35509|RB11B_RAT	Ras-related protein Rab-11B OS=Rattus norvegicus GN=Rab11b PE=2 SV=4	7	1.39316	0.361115
200	14	14	28.53	25.71	25.71	tr|Q5U362|Q5U362_RAT	Annexin OS=Rattus norvegicus GN=Anxa4 PE=2 SV=1	12	1.41906	0.286643
201	14	14	21.75	21.75	21.75	tr|G3V7H6|G3V7H6_RAT	Arginase 2 OS=Rattus norvegicus GN=Arg2 PE=3 SV=1	9	1.09648	0.404978
202	13.94	13.94	19.6	14.29	12.82	tr|D3ZRB0|D3ZRB0_RAT	Protein Cttn OS=Rattus norvegicus GN=Cttn PE=4 SV=1	8	1.33045	0.619355
203	13.77	13.8	19.43	9.974	8.083	tr|E9PTS1|E9PTS1_RAT	Protein Tjp2 OS=Rattus norvegicus GN=Tjp2 PE=4 SV=1	9	0.981748	0.918171
204	13.75	13.75	56.78	50.25	44.22	sp|Q5XFX0|TAGL2_RAT	Transgelin-2 OS=Rattus norvegicus GN=Tagln2 PE=1 SV=1	12	1.23595	0.344072
205	13.71	15.45	10.16	4.72	4.72	sp|P15800|LAMB2_RAT	Laminin subunit beta-2 OS=Rattus norvegicus GN=Lamb2 PE=2 SV=1	10	1.02802	0.855191
206	13.68	13.76	20.28	12.75	11.52	tr|D3ZHV9|D3ZHV9_RAT	Hypothetical LOC500797, isoform CRA_a OS=Rattus norvegicus GN=LOC500797 PE=4 SV=1	7	1.28233	0.349131
207	13.67	14.21	10.37	7.343	6.76	tr|F1LM85|F1LM85_RAT	Sarcolemmal membrane-associated protein OS=Rattus norvegicus GN=Slmap PE=4 SV=1	7	1.08643	0.444529
208	13.64	13.64	32.75	29.28	26.05	tr|F1LXC6|F1LXC6_RAT	Protein LOC686567 (Fragment) OS=Rattus norvegicus GN=LOC686567 PE=4 SV=1	7	1.11686	0.511308
209	13.56	17.16	23.67	21.5	21.5	sp|P41562|IDHC_RAT	Isocitrate dehydrogenase [NADP] cytoplasmic OS=Rattus norvegicus GN=Idh1 PE=1 SV=1	13	1.09648	0.845357
210	13.56	13.56	32.62	32.62	22.7	sp|P21913|DHSB_RAT	Succinate dehydrogenase [ubiquinone] iron-sulfur subunit, mitochondrial OS=Rattus norvegicus GN=Sdhb PE=2 SV=2	7	0.394457	0.0313382
211	13.51	13.56	20.32	14.79	12.43	tr|Q5M964|Q5M964_RAT	Fumarate hydratase 1 OS=Rattus norvegicus GN=Fh PE=2 SV=1	7	0.963829	0.74107
212	13.5	13.5	13.16	5.158	5.158	tr|E9PTS9|E9PTS9_RAT	Protein Acin1 OS=Rattus norvegicus GN=Acin1 PE=4 SV=1	7	1.01859	0.779266
213	13.48	13.48	45.08	45.08	45.08	tr|G3V8L1|G3V8L1_RAT	PYD and CARD domain containing OS=Rattus norvegicus GN=Pycard PE=4 SV=1	7	1.27057	0.239387
214	13.44	13.48	22.36	19.47	19.23	sp|P18418|CALR_RAT	Calreticulin OS=Rattus norvegicus GN=Calr PE=1 SV=1	10	1.23595	0.267037
215	13.43	13.44	30.2	22.22	18.52	tr|F1MAE6|F1MAE6_RAT	Ornithine carbamoyltransferase, mitochondrial OS=Rattus norvegicus GN=Otc PE=3 SV=1	6	1.18032	0.69781
216	13.31	13.35	38.67	36	33.33	tr|B5DEN5|B5DEN5_RAT	Eukaryotic translation elongation factor 1 beta 2 OS=Rattus norvegicus GN=Eef1b2 PE=2 SV=1	8	1.48594	0.12239
217	13.3	13.33	20	13.98	13.98	tr|F1LM47|F1LM47_RAT	Protein Sucla2 OS=Rattus norvegicus GN=Sucla2 PE=3 SV=1	9	0.862979	0.650935
218	13.29	13.29	31.18	24.16	22.47	sp|Q9JJ19|NHRF1_RAT	Na(+)/H(+) exchange regulatory cofactor NHE-RF1 OS=Rattus norvegicus GN=Slc9a3r1 PE=1 SV=3	6	1.51356	0.178434
219	13.23	13.23	16.5	13.86	11.39	tr|F1LQW3|F1LQW3_RAT	Protein Sfpq (Fragment) OS=Rattus norvegicus GN=Sfpq PE=4 SV=1	7	0.963829	0.717867
220	13.23	13.23	27.02	23.75	23.75	sp|Q63083|NUCB1_RAT	Nucleobindin-1 OS=Rattus norvegicus GN=Nucb1 PE=1 SV=1	9	0.981748	0.888814
221	13.22	13.24	11.93	9.785	8.95	tr|D4A8W7|D4A8W7_RAT	Protein Postn OS=Rattus norvegicus GN=Postn PE=4 SV=1	7	0.912011	0.602226
222	13.21	13.25	22.85	14.71	14.71	tr|Q6P6U2|Q6P6U2_RAT	26S protease regulatory subunit 6A OS=Rattus norvegicus GN=Psmc3 PE=2 SV=1	8	1.08643	0.457469
223	13.18	13.18	12.29	8.581	7.097	tr|D4A0W9|D4A0W9_RAT	Protein Ganab OS=Rattus norvegicus GN=Ganab PE=4 SV=1	7	1.01859	0.955858
224	13.11	13.11	25.12	22.56	20.93	sp|P15650|ACADL_RAT	Long-chain specific acyl-CoA dehydrogenase, mitochondrial OS=Rattus norvegicus GN=Acadl PE=1 SV=1	9	0.496592	0.0420777
225	13.1	13.1	15.85	12.8	12.8	sp|Q5I0D7|PEPD_RAT	Xaa-Pro dipeptidase OS=Rattus norvegicus GN=Pepd PE=2 SV=1	7	0.369828	0.0668242
226	13	13.04	20.63	11.23	11.23	sp|Q4V8H8|EHD2_RAT	EH domain-containing protein 2 OS=Rattus norvegicus GN=Ehd2 PE=1 SV=1	7	0.954993	0.353518
227	12.98	12.98	51.37	36.99	32.88	sp|P11240|COX5A_RAT	Cytochrome c oxidase subunit 5A, mitochondrial OS=Rattus norvegicus GN=Cox5a PE=1 SV=1	9	1.39316	0.347768
228	12.9	12.9	27.2	23.17	19.14	tr|G3V9U2|G3V9U2_RAT	3-ketoacyl-CoA thiolase, mitochondrial OS=Rattus norvegicus GN=Acaa2 PE=3 SV=1	6	0.981748	0.980467
229	12.87	12.87	11.98	8.128	7.594	tr|G3V6S5|G3V6S5_RAT	C-1-tetrahydrofolate synthase, cytoplasmic OS=Rattus norvegicus GN=Mthfd1 PE=3 SV=1	7	1	0.846524
230	12.87	12.87	9.887	8.569	6.309	tr|F8WFJ4|F8WFJ4_RAT	6-phosphogluconate dehydrogenase, decarboxylating OS=Rattus norvegicus GN=Kif1b PE=3 SV=1	6	0.554626	0.0918346
231	12.82	12.82	14.69	12.14	12.14	tr|E9PTZ4|E9PTZ4_RAT	Protein Rbm4 OS=Rattus norvegicus GN=Rbm4 PE=4 SV=1	8	0.954993	0.390383
232	12.78	12.78	49.54	36.11	36.11	sp|P24368|PPIB_RAT	Peptidyl-prolyl cis-trans isomerase B OS=Rattus norvegicus GN=Ppib PE=2 SV=3	7	1.03753	0.285279
233	12.75	12.75	36.29	28.57	28.57	sp|P04639|APOA1_RAT	Apolipoprotein A-I OS=Rattus norvegicus GN=Apoa1 PE=1 SV=2	8	0.862979	0.674306
234	12.58	12.72	8.526	5.684	3.701	sp|Q62635|MUC2_RAT	Mucin-2 (Fragment) OS=Rattus norvegicus GN=Muc2 PE=1 SV=1	7	1.00925	0.705008
235	12.44	12.49	7.206	3.836	3.421	tr|A9CMC8|A9CMC8_RAT	Lactase-phlorizin hydrolase OS=Rattus norvegicus GN=Lct PE=3 SV=1	8	1.02802	0.68901
236	12.41	12.41	21.04	18.03	15.57	sp|Q99NA5|IDH3A_RAT	Isocitrate dehydrogenase [NAD] subunit alpha, mitochondrial OS=Rattus norvegicus GN=Idh3a PE=1 SV=1	8	1.05682	0.620038
237	12.38	12.42	12.56	6.159	5.673	sp|Q99JE6|PLCB3_RAT	1-phosphatidylinositol 4,5-bisphosphate phosphodiesterase beta-3 OS=Rattus norvegicus GN=Plcb3 PE=1 SV=2	7	0.981748	0.705212
238	12.38	12.38	18.89	13.62	12.59	sp|Q62952-2|DPYL3_RAT	Isoform 2 of Dihydropyrimidinase-related protein 3 OS=Rattus norvegicus GN=Dpysl3	8	1.00925	0.922672
239	12.37	12.37	17.35	13.41	11.22	tr|Q9WVJ6|Q9WVJ6_RAT	Protein Tgm2 OS=Rattus norvegicus GN=Tgm2 PE=2 SV=1	9	0.625173	0.296796
240	12.34	12.45	25.54	19.78	14.03	tr|Q6P736|Q6P736_RAT	Polypyrimidine tract binding protein 1, isoform CRA_a OS=Rattus norvegicus GN=Ptbp1 PE=2 SV=1	6	1.04713	0.829769
241	12.33	12.38	20.92	20.92	18.91	sp|O35077|GPDA_RAT	Glycerol-3-phosphate dehydrogenase [NAD(+)], cytoplasmic OS=Rattus norvegicus GN=Gpd1 PE=1 SV=4	6	0.751623	0.308693
242	12.29	12.3	51.46	47.57	40.78	sp|P62804|H4_RAT	Histone H4 OS=Rattus norvegicus GN=Hist1h4b PE=1 SV=2	8	0.515229	0.309017
243	12.26	14.57	18.98	15.47	12.76	tr|Q5XI38|Q5XI38_RAT	Lymphocyte cytosolic protein 1 OS=Rattus norvegicus GN=Lcp1 PE=2 SV=1	8	1.75388	0.0881215
244	12.26	14.37	34.95	29.3	29.3	tr|D3ZJF4|D3ZJF4_RAT	Protein LOC100360986 OS=Rattus norvegicus GN=LOC100360986 PE=4 SV=1	14	0.253513	0.239284
245	12.14	12.14	39.71	25.74	25.74	sp|P67779|PHB_RAT	Prohibitin OS=Rattus norvegicus GN=Phb PE=1 SV=1	7	0.928966	0.417474
246	12.09	12.09	62.29	58.86	54.29	tr|D3ZIA7|D3ZIA7_RAT	Anterior gradient 2 (Xenopus laevis) (Predicted), isoform CRA_a OS=Rattus norvegicus GN=Agr2 PE=4 SV=1	13	1.09648	0.463676
247	12.07	13.15	17.38	13.64	13.64	sp|Q5XIM9|TCPB_RAT	T-complex protein 1 subunit beta OS=Rattus norvegicus GN=Cct2 PE=1 SV=3	8	0.990832	0.939208
248	12.06	12.06	20.86	16.77	16.77	tr|D3ZYS7|D3ZYS7_RAT	Protein G3bp1 OS=Rattus norvegicus GN=G3bp1 PE=4 SV=1	7	0.981748	0.965582
249	12.04	12.04	14.59	9.975	9.102	sp|Q3T1L0|A16A1_RAT	Aldehyde dehydrogenase family 16 member A1 OS=Rattus norvegicus GN=Aldh16a1 PE=2 SV=1	8	0.937562	0.358242
250	12	12.06	15.43	13.04	11.74	sp|P20059|HEMO_RAT	Hemopexin OS=Rattus norvegicus GN=Hpx PE=1 SV=3	11	1.97697	0.268101
251	12	12	11.35	11.35	11.35	sp|Q66H80|COPD_RAT	Coatomer subunit delta OS=Rattus norvegicus GN=Arcn1 PE=2 SV=1	7	0.787046	0.618664
252	12	12	37.14	34.29	34.29	sp|Q498U4|SARNP_RAT	SAP domain-containing ribonucleoprotein OS=Rattus norvegicus GN=Sarnp PE=1 SV=3	6	1.2942	0.356364
253	11.93	11.93	13.32	9.731	6.786	sp|Q9WU82|CTNB1_RAT	Catenin beta-1 OS=Rattus norvegicus GN=Ctnnb1 PE=1 SV=1	6	0.824138	0.395045
254	11.91	12.2	12.15	9.591	7.033	sp|P06399|FIBA_RAT	Fibrinogen alpha chain OS=Rattus norvegicus GN=Fga PE=1 SV=3	6	0.505825	0.0468535
255	11.83	11.83	27.55	24.77	18.52	sp|P10760|SAHH_RAT	Adenosylhomocysteinase OS=Rattus norvegicus GN=Ahcy PE=1 SV=3	7	0.501187	0.0649771
256	11.82	13.91	19.97	9.915	9.915	sp|Q5XHZ0|TRAP1_RAT	Heat shock protein 75 kDa, mitochondrial OS=Rattus norvegicus GN=Trap1 PE=1 SV=1	8	0.990832	0.746526
257	11.8	11.8	27.01	23.47	23.47	tr|F1M0E9|F1M0E9_RAT	Uncharacterized protein (Fragment) OS=Rattus norvegicus PE=4 SV=1	7	1.40605	0.923082
258	11.78	11.78	20.29	16.38	16.38	tr|H7C5Y3|H7C5Y3_RAT	Rab GDP dissociation inhibitor beta OS=Rattus norvegicus GN=Gdi2 PE=4 SV=1	7	1.00925	0.955614
259	11.68	11.68	29.54	18.89	13.56	sp|P13221|AATC_RAT	Aspartate aminotransferase, cytoplasmic OS=Rattus norvegicus GN=Got1 PE=1 SV=3	5	0.704693	0.30273
260	11.63	12.02	44.04	34.86	26.61	sp|P08010|GSTM2_RAT	Glutathione S-transferase Mu 2 OS=Rattus norvegicus GN=Gstm2 PE=1 SV=2	7	0.731139	0.793423
261	11.6	11.72	12.36	7.061	7.061	sp|Q2PQA9|KINH_RAT	Kinesin-1 heavy chain OS=Rattus norvegicus GN=Kif5b PE=1 SV=1	7	1.02802	0.830961
262	11.59	11.59	19.33	15.96	14.38	sp|P02680|FIBG_RAT	Fibrinogen gamma chain OS=Rattus norvegicus GN=Fgg PE=1 SV=3	7	0.879022	0.17161
263	11.58	11.58	19.35	17.03	12.37	sp|Q6P6V0|G6PI_RAT	Glucose-6-phosphate isomerase OS=Rattus norvegicus GN=Gpi PE=1 SV=1	7	0.544503	0.166209
264	11.4	11.4	29.17	24.62	16.67	sp|P49242|RS3A_RAT	40S ribosomal protein S3a OS=Rattus norvegicus GN=Rps3a PE=1 SV=2	5	0.903649	0.676559
265	11.38	11.38	52.86	50	43.57	sp|P62963|PROF1_RAT	Profilin-1 OS=Rattus norvegicus GN=Pfn1 PE=1 SV=2	11	0.954993	0.974781
266	11.25	11.25	19.54	14.8	10.44	sp|P04762|CATA_RAT	Catalase OS=Rattus norvegicus GN=Cat PE=1 SV=3	6	1	0.891861
267	11.18	15.33	29.41	27.84	27.84	sp|P62260|1433E_RAT	14-3-3 protein epsilon OS=Rattus norvegicus GN=Ywhae PE=1 SV=1	10	1.34276	0.807443
268	11.17	11.21	14.29	14.29	11.79	tr|D3ZUY6|D3ZUY6_RAT	Dolichyl-diphosphooligosaccharide--protein glycosyltransferase 48 kDa subunit OS=Rattus norvegicus GN=Ddost PE=4 SV=1	6	0.903649	0.635292
269	11.11	11.11	11.35	6.622	6.622	sp|Q641Y8|DDX1_RAT	ATP-dependent RNA helicase DDX1 OS=Rattus norvegicus GN=Ddx1 PE=2 SV=1	6	0.870964	0.431891
270	11.09	13.15	20.21	17.91	17.91	tr|D4A7U1|D4A7U1_RAT	Protein Zyx OS=Rattus norvegicus GN=Zyx PE=4 SV=1	7	1	0.561163
271	11.08	13.01	29.15	23.2	20.69	tr|Q66HH8|Q66HH8_RAT	Annexin OS=Rattus norvegicus GN=Anxa5 PE=2 SV=1	7	0.744732	0.198427
272	11.07	11.07	17.17	12.2	9.337	tr|F8WG21|F8WG21_RAT	Succinate dehydrogenase [ubiquinone] flavoprotein subunit, mitochondrial OS=Rattus norvegicus GN=Sdha PE=4 SV=1	8	0.487529	0.0790356
273	11	11	27.42	22.98	22.98	sp|Q06606|GRZ2_RAT	Granzyme-like protein 2 OS=Rattus norvegicus GN=Mcpt10 PE=2 SV=1	7	1.0666	0.151981
274	10.97	10.97	20.08	14.48	13.32	tr|Q5PQK2|Q5PQK2_RAT	Fusion, derived from t(12;16) malignant liposarcoma (Human) OS=Rattus norvegicus GN=Fus PE=2 SV=1	8	1.13763	0.63577
275	10.96	10.98	18.53	13.05	13.05	sp|Q6Q0N1|CNDP2_RAT	Cytosolic non-specific dipeptidase OS=Rattus norvegicus GN=Cndp2 PE=1 SV=1	6	1.07647	0.623398
276	10.93	10.93	33.13	30.72	22.89	sp|P45592|COF1_RAT	Cofilin-1 OS=Rattus norvegicus GN=Cfl1 PE=1 SV=3	7	1.08643	0.635295
277	10.9	17.11	20.07	17.86	14.55	sp|P12928-2|KPYR_RAT	Isoform L-type of Pyruvate kinase isozymes R/L OS=Rattus norvegicus GN=Pklr	11	0.879022	0.326232
278	10.89	10.96	14.11	9.333	7.222	tr|D3Z9E1|D3Z9E1_RAT	Elastin microfibril interfacer 1 (Predicted), isoform CRA_b OS=Rattus norvegicus GN=Emilin1 PE=4 SV=1	6	1.02802	0.674304
279	10.85	11.01	12.57	5.609	4.126	sp|Q9JLA3|UGGG1_RAT	UDP-glucose:glycoprotein glucosyltransferase 1 OS=Rattus norvegicus GN=Uggt1 PE=1 SV=2	6	1.03753	0.759559
280	10.76	10.76	12.01	9.475	9.475	sp|P35565|CALX_RAT	Calnexin OS=Rattus norvegicus GN=Canx PE=1 SV=1	10	0.895365	0.540471
281	10.74	10.82	13.24	6.618	5.95	tr|F1M6Q3|F1M6Q3_RAT	Protein Col4a2 (Fragment) OS=Rattus norvegicus GN=Col4a2 PE=4 SV=1	9	1.03753	0.956352
282	10.71	12.49	12.7	6.548	4.365	tr|F1LMJ9|F1LMJ9_RAT	Protein Eprs OS=Rattus norvegicus GN=Eprs PE=3 SV=1	7	0.654636	0.224486
283	10.66	10.66	24.5	21.14	19.13	sp|Q5I0D1|GLOD4_RAT	Glyoxalase domain-containing protein 4 OS=Rattus norvegicus GN=Glod4 PE=1 SV=1	7	1.28233	0.204653
284	10.65	10.65	45.5	45.5	41.8	sp|O88767|PARK7_RAT	Protein DJ-1 OS=Rattus norvegicus GN=Park7 PE=1 SV=1	6	1.33045	0.578148
285	10.64	13.05	9.381	4.871	4.33	sp|P01026|CO3_RAT	Complement C3 OS=Rattus norvegicus GN=C3 PE=1 SV=3	6	0.895365	0.265984
286	10.64	10.78	18.68	11.54	9.341	tr|F1LQ55|F1LQ55_RAT	Non-specific lipid-transfer protein OS=Rattus norvegicus GN=Scp2 PE=4 SV=1	7	1.25892	0.187054
287	10.62	10.62	4.591	3.635	3.635	tr|D3ZPU7|D3ZPU7_RAT	Protein Hcfc1 OS=Rattus norvegicus GN=Hcfc1 PE=4 SV=1	7	1	0.823633
288	10.62	10.62	22.09	16.51	14.65	sp|P00507|AATM_RAT	Aspartate aminotransferase, mitochondrial OS=Rattus norvegicus GN=Got2 PE=1 SV=2	7	0.57544	0.146589
289	10.59	10.71	13.93	9.167	7.024	tr|F1LRV4|F1LRV4_RAT	Heat shock 70 kDa protein 4 OS=Rattus norvegicus GN=Hspa4 PE=3 SV=1	6	0.963829	0.928471
290	10.57	10.58	14.45	6.993	5.944	sp|Q66HA8|HS105_RAT	Heat shock protein 105 kDa OS=Rattus norvegicus GN=Hsph1 PE=1 SV=1	5	1.31826	0.372739
291	10.51	10.51	8.802	3.181	2.439	tr|D4A2J0|D4A2J0_RAT	Protein Bat2d1 OS=Rattus norvegicus GN=Bat2d1 PE=4 SV=1	6	1.55597	0.113637
292	10.5	12.64	23.59	13.31	12.1	tr|F8WFQ1|F8WFQ1_RAT	EH domain-containing protein 1 (Fragment) OS=Rattus norvegicus GN=Ehd1 PE=4 SV=1	7	0.301995	0.0931606
293	10.5	12.1	23.43	17.14	14.75	sp|Q91ZN1|COR1A_RAT	Coronin-1A OS=Rattus norvegicus GN=Coro1a PE=1 SV=3	9	0.751623	0.51691
294	10.47	10.47	41.06	30.92	30.92	sp|P09527|RAB7A_RAT	Ras-related protein Rab-7a OS=Rattus norvegicus GN=Rab7a PE=1 SV=2	6	0.444631	0.051589
295	10.43	11.24	14.55	8.96	7.225	tr|F8WGA5|F8WGA5_RAT	2-oxoglutarate dehydrogenase, mitochondrial OS=Rattus norvegicus GN=Ogdh PE=4 SV=1	6	0.353183	0.133457
296	10.43	10.46	12.33	9.247	6.735	tr|F2Z3Q8|F2Z3Q8_RAT	Importin subunit beta-1 OS=Rattus norvegicus GN=Kpnb1 PE=4 SV=1	6	1.04713	0.55281
297	10.4	11.93	19.95	18.97	17.73	sp|P62198|PRS8_RAT	26S protease regulatory subunit 8 OS=Rattus norvegicus GN=Psmc5 PE=1 SV=1	7	0.92045	0.609151
298	10.4	10.4	16.04	12.83	10.34	tr|G3V9D8|G3V9D8_RAT	Protein Ces2c OS=Rattus norvegicus GN=Ces2c PE=4 SV=1	5	0.648634	0.37886
299	10.39	10.39	54.9	54.9	54.9	sp|P26772|CH10_RAT	10 kDa heat shock protein, mitochondrial OS=Rattus norvegicus GN=Hspe1 PE=1 SV=3	9	1.47231	0.303884
300	10.38	10.38	13.9	12.93	10.98	sp|P31430|DPEP1_RAT	Dipeptidase 1 OS=Rattus norvegicus GN=Dpep1 PE=2 SV=2	5	1.40605	0.44126
301	10.24	10.72	16.55	16.55	13.99	tr|D4A4T2|D4A4T2_RAT	Septin-11 OS=Rattus norvegicus GN=Sept11 PE=3 SV=1	6	1	0.95885
302	10.2	11.41	19.82	16.13	11.52	tr|F1LP72|F1LP72_RAT	Elongation factor 1-delta OS=Rattus norvegicus GN=Eef1d PE=3 SV=1	5	1.14815	0.437423
303	10.18	10.18	11.45	2.327	2.327	tr|F1LRJ2|F1LRJ2_RAT	Protein Srrm2 OS=Rattus norvegicus GN=Srrm2 PE=4 SV=1	5	1.15878	0.700962
304	10.16	10.16	30.39	25.8	21.91	sp|Q9Z2L0|VDAC1_RAT	Voltage-dependent anion-selective channel protein 1 OS=Rattus norvegicus GN=Vdac1 PE=1 SV=4	6	0.954993	0.674609
305	10.12	11.48	50.51	43.43	43.43	sp|P35704|PRDX2_RAT	Peroxiredoxin-2 OS=Rattus norvegicus GN=Prdx2 PE=1 SV=3	7	1.08643	0.664059
306	10.12	10.12	37.44	28.63	28.63	tr|Q6P2A5|Q6P2A5_RAT	Adenylate kinase OS=Rattus norvegicus GN=Ak3 PE=2 SV=1	6	1.04713	0.652404
307	10.09	10.15	23.14	15.94	15.94	tr|G3V644|G3V644_RAT	NADH dehydrogenase (Ubiquinone) flavoprotein 3-like, isoform CRA_a OS=Rattus norvegicus GN=Ndufv3 PE=4 SV=1	5	0.954993	0.956225
308	10.05	12.05	6.783	3.98	3.7	tr|D4A3J6|D4A3J6_RAT	Uncharacterized protein OS=Rattus norvegicus PE=4 SV=1	7	1.5417	0.408241
309	10.03	10.03	20.88	14.25	14.25	sp|Q6AXS5|PAIRB_RAT	Plasminogen activator inhibitor 1 RNA-binding protein OS=Rattus norvegicus GN=Serbp1 PE=1 SV=2	5	1.38038	0.376369
310	10.02	10.02	12.39	10.14	6.258	sp|P49134|ITB1_RAT	Integrin beta-1 OS=Rattus norvegicus GN=Itgb1 PE=2 SV=1	5	1.01859	0.847161
311	10.01	11.43	27.82	25.4	25.4	sp|P19234|NDUV2_RAT	NADH dehydrogenase [ubiquinone] flavoprotein 2, mitochondrial OS=Rattus norvegicus GN=Ndufv2 PE=1 SV=2	6	1.01859	0.520418
312	10.01	10.01	11.73	7.692	7.692	sp|B2GV06|SCOT1_RAT	Succinyl-CoA:3-ketoacid coenzyme A transferase 1, mitochondrial OS=Rattus norvegicus GN=Oxct1 PE=1 SV=1	5	0.855067	0.798428
313	10.01	10.01	18.03	16.89	16.89	sp|Q794F9|4F2_RAT	4F2 cell-surface antigen heavy chain OS=Rattus norvegicus GN=Slc3a2 PE=1 SV=1	6	1.31826	0.485212
314	10	10.83	16.79	14.63	13.19	tr|D3ZZC1|D3ZZC1_RAT	Protein LOC100362805 OS=Rattus norvegicus GN=Txndc5 PE=3 SV=1	5	0.937562	0.686878
315	10	10.19	23.82	17.22	14.86	sp|P17764|THIL_RAT	Acetyl-CoA acetyltransferase, mitochondrial OS=Rattus norvegicus GN=Acat1 PE=1 SV=1	6	1.01859	0.732141
316	10	10	36.39	29.66	21.71	sp|P52944|PDLI1_RAT	PDZ and LIM domain protein 1 OS=Rattus norvegicus GN=Pdlim1 PE=2 SV=4	5	1.18032	0.35256
317	10	10	19.4	14.18	14.18	sp|Q6AYH5|DCTN2_RAT	Dynactin subunit 2 OS=Rattus norvegicus GN=Dctn2 PE=1 SV=1	7	0.954993	0.956588
318	10	10	12.18	10.83	10.83	sp|Q62920|PDLI5_RAT	PDZ and LIM domain protein 5 OS=Rattus norvegicus GN=Pdlim5 PE=1 SV=2	5	0.954993	0.647211
319	10	10	18.37	16.84	16.84	tr|G3V8L9|G3V8L9_RAT	Polymerase I and transcript release factor OS=Rattus norvegicus GN=Ptrf PE=4 SV=1	8	1.23595	0.40878
320	10	10	21.26	21.26	21.26	sp|P25113|PGAM1_RAT	Phosphoglycerate mutase 1 OS=Rattus norvegicus GN=Pgam1 PE=1 SV=4	9	0.862979	0.652384
321	9.97	10.2	49.52	44.76	39.05	tr|D4A5L9|D4A5L9_RAT	Protein LOC679794 OS=Rattus norvegicus GN=LOC690675 PE=3 SV=1	14	1.22462	0.671922
322	9.89	9.89	22.89	22.89	22.89	sp|P48500|TPIS_RAT	Triosephosphate isomerase OS=Rattus norvegicus GN=Tpi1 PE=1 SV=2	6	0.972747	0.970269
323	9.85	9.85	23.05	16.49	10.28	tr|G3V713|G3V713_RAT	Tyrosine--tRNA ligase, cytoplasmic OS=Rattus norvegicus GN=Yars PE=4 SV=1	6	0.963829	0.868942
324	9.85	9.85	12.99	10.69	9.539	tr|G3V6T5|G3V6T5_RAT	Apoptosis-inducing factor 1, mitochondrial OS=Rattus norvegicus GN=Aifm1 PE=4 SV=1	5	0.895365	0.399323
325	9.84	9.84	37.86	35.44	35.44	tr|G3V913|G3V913_RAT	Heat shock 27kDa protein 1 OS=Rattus norvegicus GN=Hspb1 PE=3 SV=1	6	1.99526	0.119524
326	9.83	10.06	12.01	6.972	4.971	tr|F1LR41|F1LR41_RAT	Glucose-6-phosphatase OS=Rattus norvegicus GN=G6pc PE=4 SV=1	5	0.937562	0.769126
327	9.77	9.84	7.111	5.756	5.192	sp|Q9R0T4|CADH1_RAT	Cadherin-1 OS=Rattus norvegicus GN=Cdh1 PE=1 SV=1	5	1.10662	0.525144
328	9.71	9.71	15.38	13.26	13.26	sp|Q5BK63|NDUA9_RAT	NADH dehydrogenase [ubiquinone] 1 alpha subcomplex subunit 9, mitochondrial OS=Rattus norvegicus GN=Ndufa9 PE=1 SV=2	5	1.08643	0.538994
329	9.63	9.63	9.868	5.091	4.4	tr|D4AD15|D4AD15_RAT	Protein Eif4g1 OS=Rattus norvegicus GN=Eif4g1 PE=4 SV=1	6	0.704693	0.310168
330	9.62	15.75	22.98	18.16	17.07	tr|G3V712|G3V712_RAT	Keratin complex 2, basic, gene 7, isoform CRA_a OS=Rattus norvegicus GN=Krt7 PE=3 SV=1	11	1.08643	0.601762
331	9.61	9.73	16.85	8.696	6.413	tr|F1M9V7|F1M9V7_RAT	Protein Npepps OS=Rattus norvegicus GN=Npepps PE=4 SV=1	5	0.642688	0.355729
332	9.59	9.6	7.971	4.508	3.353	tr|D3ZFE1|D3ZFE1_RAT	Integrin beta OS=Rattus norvegicus GN=Itgb4 PE=3 SV=1	5	0.990832	0.952875
333	9.56	9.6	14.85	8.788	7.727	sp|P40329|SYRC_RAT	Arginine--tRNA ligase, cytoplasmic OS=Rattus norvegicus GN=Rars PE=1 SV=2	5	0.398107	0.0897253
334	9.51	9.51	24.22	24.22	20.07	sp|P85973|PNPH_RAT	Purine nucleoside phosphorylase OS=Rattus norvegicus GN=Pnp PE=1 SV=1	6	0.862979	0.377725
335	9.47	9.47	5.828	4.831	4.831	tr|G3V7T6|G3V7T6_RAT	Protein Sf3b1 OS=Rattus norvegicus GN=Sf3b1 PE=4 SV=1	6	1.1695	0.388475
336	9.43	9.57	30.08	18.36	18.36	sp|P19511|AT5F1_RAT	ATP synthase subunit b, mitochondrial OS=Rattus norvegicus GN=Atp5f1 PE=1 SV=1	6	0.432514	0.0602501
337	9.4	9.79	17.46	13.72	13.72	tr|F1LQZ4|F1LQZ4_RAT	Caspase (Fragment) OS=Rattus norvegicus GN=Casp1 PE=3 SV=1	7	0.963829	0.817951
338	9.39	9.4	13.84	7.664	3.571	tr|F1LRG1|F1LRG1_RAT	Eukaryotic translation initiation factor 3 subunit A OS=Rattus norvegicus GN=Eif3a PE=4 SV=1	5	0.887156	0.337371
339	9.36	9.37	21.99	21.99	21.99	sp|Q6MG61|CLIC1_RAT	Chloride intracellular channel protein 1 OS=Rattus norvegicus GN=Clic1 PE=1 SV=1	5	0.954993	0.902838
340	9.35	9.42	19.38	8.651	8.651	sp|Q4KLZ6|DHAK_RAT	Bifunctional ATP-dependent dihydroxyacetone kinase/FAD-AMP lyase (cyclizing) OS=Rattus norvegicus GN=Dak PE=1 SV=1	5	0.981748	0.865782
341	9.31	9.31	21.2	21.2	17.39	sp|Q6P7Q4|LGUL_RAT	Lactoylglutathione lyase OS=Rattus norvegicus GN=Glo1 PE=1 SV=3	5	1.01859	0.684127
342	9.29	9.32	17.72	17.72	17.72	sp|P13803|ETFA_RAT	Electron transfer flavoprotein subunit alpha, mitochondrial OS=Rattus norvegicus GN=Etfa PE=1 SV=4	6	1.33045	0.213615
343	9.28	10.88	22.58	15.88	12.9	tr|G3V6W6|G3V6W6_RAT	Protein LOC100365869 OS=Rattus norvegicus GN=LOC100365869 PE=3 SV=1	5	0.946237	0.818109
344	9.28	9.28	24.72	19.15	13.36	tr|G3V9Q3|G3V9Q3_RAT	Heterogeneous nuclear ribonucleoprotein H1, isoform CRA_b OS=Rattus norvegicus GN=Hnrph1 PE=4 SV=1	4	1.08643	0.661855
345	9.28	9.28	31.7	24.11	24.11	sp|O35244|PRDX6_RAT	Peroxiredoxin-6 OS=Rattus norvegicus GN=Prdx6 PE=1 SV=3	5	2.31206	0.075238
346	9.27	11.09	24.29	21.45	19.56	sp|P63245|GBLP_RAT	Guanine nucleotide-binding protein subunit beta-2-like 1 OS=Rattus norvegicus GN=Gnb2l1 PE=1 SV=3	6	0.981748	0.816209
347	9.23	9.47	17.1	14.99	13.82	sp|Q5U216|DX39A_RAT	ATP-dependent RNA helicase DDX39A OS=Rattus norvegicus GN=Ddx39a PE=2 SV=1	6	0.92045	0.307801
348	9.23	9.23	16.51	12.26	10.61	sp|P12007|IVD_RAT	Isovaleryl-CoA dehydrogenase, mitochondrial OS=Rattus norvegicus GN=Ivd PE=1 SV=2	6	0.981748	0.92765
349	9.22	9.28	12.11	8.648	7.547	tr|Q6AYD5|Q6AYD5_RAT	G1 to S phase transition 1 OS=Rattus norvegicus GN=Gspt1 PE=2 SV=1	5	0.928966	0.225326
350	9.2	9.22	12.91	10.36	7.808	tr|G3V8Z2|G3V8Z2_RAT	X-prolyl aminopeptidase (Aminopeptidase P) 1, soluble, isoform CRA_a OS=Rattus norvegicus GN=Xpnpep1 PE=3 SV=1	5	1.04713	0.948691
351	9.16	9.16	17.29	17.29	17.29	tr|B5DEX4|B5DEX4_RAT	Protein Vasp OS=Rattus norvegicus GN=Vasp PE=2 SV=1	7	0.972747	0.941266
352	9.15	11.35	18.01	13.64	13.64	sp|P47942|DPYL2_RAT	Dihydropyrimidinase-related protein 2 OS=Rattus norvegicus GN=Dpysl2 PE=1 SV=1	8	1.00925	0.955176
353	9.1	9.1	12.09	6.047	4.341	tr|F1M820|F1M820_RAT	Uncharacterized protein (Fragment) OS=Rattus norvegicus PE=4 SV=1	5	1.0666	0.280335
354	9.09	9.09	9.224	6.637	5.962	tr|G3V6S2|G3V6S2_RAT	Cytoplasmic aconitate hydratase OS=Rattus norvegicus GN=Aco1 PE=4 SV=1	5	0.972747	0.847843
355	9.06	9.15	39.64	31.95	24.26	sp|P10888|COX41_RAT	Cytochrome c oxidase subunit 4 isoform 1, mitochondrial OS=Rattus norvegicus GN=Cox4i1 PE=1 SV=1	8	0.654636	0.330379
356	9.06	9.06	29.41	18.01	18.01	sp|Q5XI32|CAPZB_RAT	F-actin-capping protein subunit beta OS=Rattus norvegicus GN=Capzb PE=1 SV=1	5	1.11686	0.974301
357	9.05	9.45	15.28	10.71	9.722	tr|Q5U3Z7|Q5U3Z7_RAT	Serine hydroxymethyltransferase OS=Rattus norvegicus GN=Shmt2 PE=2 SV=1	5	0.619441	0.229951
358	9.03	9.03	25.35	20.19	20.19	tr|D3ZEN5|D3ZEN5_RAT	Peroxiredoxin-5, mitochondrial OS=Rattus norvegicus GN=Prdx5 PE=4 SV=1	5	1.6293	0.32284
359	9	9.07	20.91	19.01	19.01	sp|P18420|PSA1_RAT	Proteasome subunit alpha type-1 OS=Rattus norvegicus GN=Psma1 PE=1 SV=2	5	0.912011	0.261763
360	9	9	28.24	26.27	24.31	sp|P18422|PSA3_RAT	Proteasome subunit alpha type-3 OS=Rattus norvegicus GN=Psma3 PE=1 SV=3	7	0.963829	0.866029
361	8.99	13.56	15.67	13.21	11.67	tr|E9PT29|E9PT29_RAT	Protein Ddx17 OS=Rattus norvegicus GN=Ddx17 PE=3 SV=1	8	0.794328	0.332791
362	8.97	9.1	12.01	7.28	7.28	tr|D4A5D7|D4A5D7_RAT	Protein Ppp1r12c OS=Rattus norvegicus GN=Ppp1r12c PE=4 SV=1	6	1.0666	0.612164
363	8.92	9.52	18.49	16.97	12.94	tr|F1LQ48|F1LQ48_RAT	Protein Hnrnpl OS=Rattus norvegicus GN=Hnrnpl PE=4 SV=1	6	0.539511	0.0541864
364	8.89	8.89	16.99	14.01	9.554	tr|F1LRJ9|F1LRJ9_RAT	Selenium-binding protein 1 (Fragment) OS=Rattus norvegicus GN=Selenbp1 PE=4 SV=1	5	1.10662	0.233947
365	8.89	8.89	39.47	30.26	30.26	sp|P62271|RS18_RAT	40S ribosomal protein S18 OS=Rattus norvegicus GN=Rps18 PE=1 SV=3	5	0.903649	0.559547
366	8.89	8.89	56.1	56.1	54.88	tr|B2RZD6|B2RZD6_RAT	Ndufa4 protein OS=Rattus norvegicus GN=Ndufa4 PE=4 SV=1	5	0.731139	0.691231
367	8.87	8.87	10.83	8.881	7.786	tr|D3ZJ50|D3ZJ50_RAT	Plakophilin 3 (Predicted), isoform CRA_a OS=Rattus norvegicus GN=Pkp3 PE=4 SV=1	5	0.879022	0.172872
368	8.85	10.94	16.55	11.15	9.353	sp|P28480|TCPA_RAT	T-complex protein 1 subunit alpha OS=Rattus norvegicus GN=Tcp1 PE=1 SV=1	5	0.937562	0.347093
369	8.83	8.87	11.68	6.882	5.878	tr|D4A206|D4A206_RAT	Protein Tcof1 OS=Rattus norvegicus GN=Tcof1 PE=4 SV=1	6	1.01859	0.720195
370	8.82	8.82	41.67	34.09	34.09	sp|P02693|FABPI_RAT	Fatty acid-binding protein, intestinal OS=Rattus norvegicus GN=Fabp2 PE=1 SV=4	5	2.65461	0.315163
371	8.81	8.81	23.1	20.69	20.69	sp|P14604|ECHM_RAT	Enoyl-CoA hydratase, mitochondrial OS=Rattus norvegicus GN=Echs1 PE=1 SV=1	5	1.07647	0.561629
372	8.77	8.8	11.55	10.18	6.052	tr|F1LY50|F1LY50_RAT	Protein Dvwa (Fragment) OS=Rattus norvegicus GN=Col6a4p1 PE=4 SV=1	6	0.787046	0.461191
373	8.73	8.73	26.86	23.55	17.77	tr|B5DF46|B5DF46_RAT	Phosphomannomutase 2 OS=Rattus norvegicus GN=Pmm2 PE=2 SV=1	4	1.10662	0.465326
374	8.71	8.71	8.094	7.42	6.071	tr|D4AB05|D4AB05_RAT	Protein Lmod1 OS=Rattus norvegicus GN=Lmod1 PE=4 SV=1	4	0.452898	0.242312
375	8.69	8.69	11.54	9.262	9.262	sp|O54697|NALDL_RAT	N-acetylated-alpha-linked acidic dipeptidase-like protein OS=Rattus norvegicus GN=Naaladl1 PE=1 SV=1	6	1.6293	0.119621
376	8.64	8.64	19	17.9	10.26	tr|F8WG74|F8WG74_RAT	Peptidyl-prolyl cis-trans isomerase FKBP4 OS=Rattus norvegicus GN=Fkbp4 PE=4 SV=1	5	1.01859	0.939522
377	8.54	8.54	17.57	14.7	12.46	tr|G3V9R8|G3V9R8_RAT	Heterogeneous nuclear ribonucleoprotein C OS=Rattus norvegicus GN=LOC100911576 PE=4 SV=1	4	1.00925	0.811236
378	8.53	8.88	15.33	9.54	6.814	sp|Q9ES21|SAC1_RAT	Phosphatidylinositide phosphatase SAC1 OS=Rattus norvegicus GN=Sacm1l PE=1 SV=1	5	0.954993	0.91755
379	8.53	8.85	12.53	9.071	9.071	sp|Q641Y2|NDUS2_RAT	NADH dehydrogenase [ubiquinone] iron-sulfur protein 2, mitochondrial OS=Rattus norvegicus GN=Ndufs2 PE=1 SV=1	5	0.92045	0.728211
380	8.49	8.49	22.09	15.34	13.5	tr|B5DF91|B5DF91_RAT	ELAV (Embryonic lethal, abnormal vision, Drosophila)-like 1 (Hu antigen R) OS=Rattus norvegicus GN=Elavl1 PE=2 SV=1	4	0.946237	0.852213
381	8.48	8.5	31.98	29.73	29.73	sp|P07895|SODM_RAT	Superoxide dismutase [Mn], mitochondrial OS=Rattus norvegicus GN=Sod2 PE=1 SV=2	6	1.02802	0.489227
382	8.47	8.47	21.47	12.23	9.783	sp|P50503|F10A1_RAT	Hsc70-interacting protein OS=Rattus norvegicus GN=St13 PE=1 SV=1	5	1.1272	0.322297
383	8.46	10	14.33	13	13	tr|E9PU16|E9PU16_RAT	Protein Rab1 OS=Rattus norvegicus GN=Rab1 PE=3 SV=1	5	0.539511	0.361883
384	8.46	8.73	20.22	15.3	12.02	tr|Q6MGB8|Q6MGB8_RAT	Protein RT1-A2 OS=Rattus norvegicus GN=RT1-A2 PE=2 SV=1	6	0.794328	0.794406
385	8.46	8.58	17.44	11.16	8.722	sp|O70199|UGDH_RAT	UDP-glucose 6-dehydrogenase OS=Rattus norvegicus GN=Ugdh PE=1 SV=1	4	0.981748	0.792667
386	8.46	8.46	13.87	11.27	11.27	sp|P13086|SUCA_RAT	Succinyl-CoA ligase [ADP/GDP-forming] subunit alpha, mitochondrial OS=Rattus norvegicus GN=Suclg1 PE=2 SV=2	5	0.895365	0.59501
387	8.43	8.57	9.906	6.986	6.257	sp|P41542|USO1_RAT	General vesicular transport factor p115 OS=Rattus norvegicus GN=Uso1 PE=1 SV=1	6	1.07647	0.569028
388	8.41	8.41	15.24	6.939	6.939	sp|P97852|DHB4_RAT	Peroxisomal multifunctional enzyme type 2 OS=Rattus norvegicus GN=Hsd17b4 PE=1 SV=3	7	0.870964	0.402752
389	8.39	10.33	20.81	19.25	19.25	sp|P23457|DIDH_RAT	3-alpha-hydroxysteroid dehydrogenase OS=Rattus norvegicus GN=Akr1c9 PE=1 SV=1	6	0.946237	0.72912
390	8.38	8.38	52.65	22.12	19.47	tr|D3Z964|D3Z964_RAT	Protein Sfrs7 OS=Rattus norvegicus GN=Sfrs7 PE=4 SV=1	4	1.27057	0.863897
391	8.38	8.38	22.02	17.43	15.14	sp|Q9JHL4|DBNL_RAT	Drebrin-like protein OS=Rattus norvegicus GN=Dbnl PE=1 SV=1	7	1.00925	0.94099
392	8.38	8.38	15.89	10.85	10.85	tr|D3ZN29|D3ZN29_RAT	Protein Ahnak OS=Rattus norvegicus GN=Ahnak PE=4 SV=1	6	1.64437	0.272036
393	8.35	8.39	31.22	24.43	18.1	sp|P46418|GSTA5_RAT	Glutathione S-transferase alpha-5 OS=Rattus norvegicus GN=Gsta5 PE=1 SV=2	4	1.05682	0.871343
394	8.34	20.59	53.06	47.62	41.5	tr|Q62669|Q62669_RAT	Protein Hbb-b1 OS=Rattus norvegicus GN=MGC72973 PE=2 SV=1	18	1.30617	0.598833
395	8.32	8.32	18.8	15.42	9.398	sp|Q4KMA2|RD23B_RAT	UV excision repair protein RAD23 homolog B OS=Rattus norvegicus GN=Rad23b PE=1 SV=1	4	1.25892	0.354209
396	8.31	8.31	8.406	8.406	8.406	tr|F1LPR6|F1LPR6_RAT	Uncharacterized protein (Fragment) OS=Rattus norvegicus PE=4 SV=1	5	1.05682	0.871198
397	8.26	8.26	34.23	26.85	26.85	tr|D4ABV5|D4ABV5_RAT	Calmodulin OS=Rattus norvegicus GN=Calm2 PE=4 SV=1	8	1.6293	0.10357
398	8.21	8.27	20.07	14.63	12.24	tr|F1LMW6|F1LMW6_RAT	Protein Psmd14 (Fragment) OS=Rattus norvegicus GN=Psmd14 PE=4 SV=1	4	0.972747	0.899147
399	8.18	8.18	40.95	35.24	23.81	sp|P04906|GSTP1_RAT	Glutathione S-transferase P OS=Rattus norvegicus GN=Gstp1 PE=1 SV=2	5	0.954993	0.716699
400	8.14	8.14	27.31	22.09	21.69	sp|Q9Z270|VAPA_RAT	Vesicle-associated membrane protein-associated protein A OS=Rattus norvegicus GN=Vapa PE=1 SV=3	4	0.77983	0.259439
401	8.12	8.18	19.7	12.07	10.59	tr|Q5VLR5|Q5VLR5_RAT	BWK4 OS=Rattus norvegicus GN=Erp44 PE=2 SV=1	4	1.0666	0.723651
402	8.09	8.12	21.07	11.62	11.62	tr|Q4FZU0|Q4FZU0_RAT	Acid phosphatase 6, lysophosphatidic OS=Rattus norvegicus GN=Acp6 PE=2 SV=1	4	0.636796	0.179706
403	8.08	8.2	26.06	20.52	14.98	sp|Q5RJR8|LRC59_RAT	Leucine-rich repeat-containing protein 59 OS=Rattus norvegicus GN=Lrrc59 PE=1 SV=1	5	1	0.837651
404	8.07	8.07	32.64	28.03	23.85	sp|P29410|KAD2_RAT	Adenylate kinase 2, mitochondrial OS=Rattus norvegicus GN=Ak2 PE=2 SV=2	7	0.972747	0.778944
405	8.07	8.07	28.7	23.15	19.91	sp|P62828|RAN_RAT	GTP-binding nuclear protein Ran OS=Rattus norvegicus GN=Ran PE=1 SV=3	5	0.619441	0.399988
406	8.07	8.07	48.37	48.37	48.37	tr|G3V9Z2|G3V9Z2_RAT	Protein LOC100360548 OS=Rattus norvegicus GN=LOC100360548 PE=4 SV=1	7	1.72187	0.230369
407	8.05	8.07	12.93	7.182	6.409	sp|O35142|COPB2_RAT	Coatomer subunit beta' OS=Rattus norvegicus GN=Copb2 PE=1 SV=3	5	0.544503	0.144359
408	8.05	8.05	19.07	19.07	14.79	tr|G3V7I0|G3V7I0_RAT	Peroxiredoxin 3 OS=Rattus norvegicus GN=Prdx3 PE=4 SV=1	4	0.831764	0.736554
409	8.04	8.15	28.92	18.12	12.89	tr|F1LZV8|F1LZV8_RAT	Uncharacterized protein (Fragment) OS=Rattus norvegicus PE=3 SV=1	4	1.00925	0.979037
410	8.04	8.08	9.494	4.272	4.272	sp|Q04462|SYVC_RAT	Valine--tRNA ligase OS=Rattus norvegicus GN=Vars PE=2 SV=2	5	0.387258	0.109896
411	8.04	8.04	5.751	2.876	2.516	tr|D3Z9Q9|D3Z9Q9_RAT	Protein Dhx9 OS=Rattus norvegicus GN=Dhx9 PE=4 SV=1	4	0.895365	0.38653
412	8.03	12.04	18.95	18.95	18.95	sp|P09495|TPM4_RAT	Tropomyosin alpha-4 chain OS=Rattus norvegicus GN=Tpm4 PE=1 SV=3	13	1.24738	0.635731
413	8.02	8.65	10.32	5.053	3.895	sp|Q924S5|LONM_RAT	Lon protease homolog, mitochondrial OS=Rattus norvegicus GN=Lonp1 PE=2 SV=1	4	1.04713	0.811358
414	8.02	8.31	20	15.69	13.73	sp|Q68FU3|ETFB_RAT	Electron transfer flavoprotein subunit beta OS=Rattus norvegicus GN=Etfb PE=2 SV=3	4	1.07647	0.624028
415	8.01	8.04	28.92	14.71	14.71	sp|Q5XI73|GDIR1_RAT	Rho GDP-dissociation inhibitor 1 OS=Rattus norvegicus GN=Arhgdia PE=1 SV=1	8	1.03753	0.818853
416	8	8.07	25.76	14.58	14.58	sp|P81155|VDAC2_RAT	Voltage-dependent anion-selective channel protein 2 OS=Rattus norvegicus GN=Vdac2 PE=1 SV=2	5	0.711214	0.45591
417	8	8.04	40.82	28.06	21.43	sp|Q4KM73|KCY_RAT	UMP-CMP kinase OS=Rattus norvegicus GN=Cmpk1 PE=1 SV=2	5	1.61436	0.259465
418	8	8.03	26.24	17.11	17.11	sp|Q9Z1H9|PRDBP_RAT	Protein kinase C delta-binding protein OS=Rattus norvegicus GN=Prkcdbp PE=1 SV=1	4	1.19124	0.381705
419	8	8.01	14.04	11.84	10.53	sp|P60123|RUVB1_RAT	RuvB-like 1 OS=Rattus norvegicus GN=Ruvbl1 PE=1 SV=1	4	1.07647	0.484685
420	8	8	8.159	5.128	5.128	tr|D3ZVQ0|D3ZVQ0_RAT	Ubiquitin carboxyl-terminal hydrolase OS=Rattus norvegicus GN=Usp5 PE=3 SV=1	4	1.11686	0.497531
421	8	8	8.664	6.859	6.859	tr|F1LS50|F1LS50_RAT	Bifunctional epoxide hydrolase 2 OS=Rattus norvegicus GN=Ephx2 PE=4 SV=1	4	0.794328	0.453665
422	8	8	20.83	19.17	19.17	tr|Q6PDW4|Q6PDW4_RAT	Proteasome subunit beta type OS=Rattus norvegicus GN=Psmb1 PE=2 SV=1	4	0.928966	0.750191
423	8	8	17.42	11.24	11.24	tr|D3ZS68|D3ZS68_RAT	Protein Pcbp1 OS=Rattus norvegicus GN=Pcbp1 PE=4 SV=1	4	1.05682	0.685929
424	8	8	30.23	30.23	30.23	sp|P12075|COX5B_RAT	Cytochrome c oxidase subunit 5B, mitochondrial OS=Rattus norvegicus GN=Cox5b PE=1 SV=2	7	0.972747	0.868458
425	7.99	7.99	10.64	5.237	5.237	tr|Q5RKG9|Q5RKG9_RAT	Eukaryotic translation initiation factor 4B OS=Rattus norvegicus GN=Eif4b PE=2 SV=1	4	1.11686	0.582512
426	7.96	7.96	15.26	11.44	11.44	sp|Q8CG45|ARK72_RAT	Aflatoxin B1 aldehyde reductase member 2 OS=Rattus norvegicus GN=Akr7a2 PE=1 SV=2	5	0.928966	0.551298
427	7.95	7.98	9.872	7.313	7.313	sp|P97881|MUC13_RAT	Mucin-13 OS=Rattus norvegicus GN=Muc13 PE=2 SV=1	6	1.00925	0.940324
428	7.94	7.94	11.59	10.47	7.29	tr|G3V7J0|G3V7J0_RAT	Aldehyde dehydrogenase family 6, subfamily A1, isoform CRA_b OS=Rattus norvegicus GN=Aldh6a1 PE=3 SV=1	4	1.1695	0.115274
429	7.91	7.91	40.32	25.27	17.74	tr|D3ZN59|D3ZN59_RAT	Uncharacterized protein OS=Rattus norvegicus PE=4 SV=1	8	1.30617	0.245697
430	7.9	8.77	16.07	11.21	7.822	tr|F1M7P4|F1M7P4_RAT	Peripherin OS=Rattus norvegicus GN=Prph PE=3 SV=1	4	1.1695	0.584986
431	7.87	8.19	15.41	8.507	6.742	tr|D3ZME6|D3ZME6_RAT	Heterogeneous nuclear ribonucleoprotein Q OS=Rattus norvegicus GN=Syncrip PE=4 SV=1	5	1.02802	0.687487
432	7.83	8.32	16.25	10.64	9.244	tr|Q6IRH6|Q6IRH6_RAT	Phosphate carrier protein, mitochondrial OS=Rattus norvegicus GN=Slc25a3 PE=2 SV=1	6	0.356451	0.184422
433	7.83	7.83	15.03	10.47	10.47	sp|O35567|PUR9_RAT	Bifunctional purine biosynthesis protein PURH OS=Rattus norvegicus GN=Atic PE=1 SV=2	5	0.847227	0.488182
434	7.81	7.81	18.53	13.68	10.74	tr|B1WC67|B1WC67_RAT	Protein Slc25a24 OS=Rattus norvegicus GN=Slc25a24 PE=2 SV=1	5	0.772681	0.363366
435	7.8	7.8	18.13	15.71	11.48	tr|Q499R7|Q499R7_RAT	Ppa1 protein (Fragment) OS=Rattus norvegicus GN=Ppa1 PE=2 SV=1	5	1.0666	0.839598
436	7.79	7.79	20.21	11.96	8.247	tr|K7GK59|K7GK59_RAT	26S proteasome non-ATPase regulatory subunit 11 OS=Rattus norvegicus GN=Psmd11 PE=4 SV=1	4	0.895365	0.521205
437	7.78	7.85	18.09	9.208	7.431	sp|Q5PQM2|KLC4_RAT	Kinesin light chain 4 OS=Rattus norvegicus GN=Klc4 PE=2 SV=1	5	1.31826	0.392484
438	7.76	8.28	18.43	16.95	12.5	sp|P81795|IF2G_RAT	Eukaryotic translation initiation factor 2 subunit 3 OS=Rattus norvegicus GN=Eif2s3 PE=1 SV=2	5	0.972747	0.801973
439	7.7	7.79	26.94	21.92	17.81	sp|Q6AY63|NUDT5_RAT	ADP-sugar pyrophosphatase OS=Rattus norvegicus GN=Nudt5 PE=2 SV=1	4	1.07647	0.667802
440	7.7	7.7	26.7	21.59	21.59	sp|Q5PPN5|TPPP3_RAT	Tubulin polymerization-promoting protein family member 3 OS=Rattus norvegicus GN=Tppp3 PE=2 SV=1	4	1.59956	0.234994
441	7.68	7.68	50.43	46.09	46.09	tr|D4A4D5|D4A4D5_RAT	Protein LOC498555 OS=Rattus norvegicus GN=LOC498555 PE=4 SV=1	4	1.48594	0.568997
442	7.68	7.68	7.908	7.249	7.249	tr|Q6QI09|Q6QI09_RAT	ATP synthase gamma chain OS=Rattus norvegicus GN=Atp5c1 PE=2 SV=1	6	0.625173	0.466399
443	7.67	8.83	16.37	11.78	10.38	sp|P15178|SYDC_RAT	Aspartate--tRNA ligase, cytoplasmic OS=Rattus norvegicus GN=Dars PE=2 SV=1	5	0.903649	0.461655
444	7.65	7.65	12.53	9.867	7.333	sp|P07861|NEP_RAT	Neprilysin OS=Rattus norvegicus GN=Mme PE=1 SV=2	5	1.10662	0.647037
445	7.64	12	14.5	8.912	7.855	tr|D4ADE8|D4ADE8_RAT	Protein Ddx3x OS=Rattus norvegicus GN=Ddx3x PE=3 SV=1	6	0.981748	0.689683
446	7.62	7.77	34.88	32.56	32.56	tr|D4A311|D4A311_RAT	NADH dehydrogenase (Ubiquinone) 1 alpha subcomplex, 8 OS=Rattus norvegicus GN=Ndufa8 PE=4 SV=1	5	0.428549	0.862655
447	7.61	11.64	13.42	8.054	7.114	sp|Q6P0K8|PLAK_RAT	Junction plakoglobin OS=Rattus norvegicus GN=Jup PE=1 SV=1	7	0.963829	0.809296
448	7.59	7.59	34.26	25	25	sp|Q6PEC1|TBCA_RAT	Tubulin-specific chaperone A OS=Rattus norvegicus GN=Tbca PE=1 SV=1	4	1.03753	0.946841
449	7.57	7.57	20.58	11.67	9.076	tr|D4A133|D4A133_RAT	Protein Atp6v1a OS=Rattus norvegicus GN=Atp6v1a PE=3 SV=1	5	0.946237	0.847311
450	7.56	7.7	21.27	19.37	19.37	tr|Q4G079|Q4G079_RAT	Protein Aimp1 OS=Rattus norvegicus GN=Aimp1 PE=2 SV=1	5	1.40605	0.270251
451	7.56	7.59	10.72	5.145	4.073	tr|Q5EBC0|Q5EBC0_RAT	Inter alpha-trypsin inhibitor, heavy chain 4 OS=Rattus norvegicus GN=Itih4 PE=2 SV=1	4	1.25892	0.149739
452	7.56	7.56	23.96	13.61	12.13	sp|P51886|LUM_RAT	Lumican OS=Rattus norvegicus GN=Lum PE=2 SV=1	7	1.23595	0.474784
453	7.54	7.57	14.52	10.69	10.69	sp|P25409|ALAT1_RAT	Alanine aminotransferase 1 OS=Rattus norvegicus GN=Gpt PE=1 SV=2	5	1.01859	0.40442
454	7.54	7.54	10.81	4.107	2.85	tr|D4A4X4|D4A4X4_RAT	Protein Cgn OS=Rattus norvegicus GN=Cgn PE=4 SV=1	4	0.963829	0.958411
455	7.51	7.51	41.53	30.51	30.51	tr|F1M937|F1M937_RAT	Protein LOC684822 (Fragment) OS=Rattus norvegicus GN=LOC684822 PE=4 SV=1	4	1.09648	0.531215
456	7.47	7.47	11.32	6.792	6.792	tr|F1MA64|F1MA64_RAT	Protein Rbm39 OS=Rattus norvegicus GN=Rbm39 PE=4 SV=1	4	1.00925	0.529577
457	7.44	9.64	14.45	10.94	10.94	tr|F1M9V8|F1M9V8_RAT	Aldehyde dehydrogenase family 1 member A3 OS=Rattus norvegicus GN=Aldh1a3 PE=3 SV=1	6	0.928966	0.333594
458	7.43	7.43	25.75	18.06	15.38	sp|Q5XIH7|PHB2_RAT	Prohibitin-2 OS=Rattus norvegicus GN=Phb2 PE=1 SV=1	4	0.912011	0.623672
459	7.43	7.43	10.72	8.392	8.392	tr|F8WFM1|F8WFM1_RAT	Eukaryotic translation initiation factor 5 OS=Rattus norvegicus GN=Eif5 PE=4 SV=1	4	1.00925	0.877172
460	7.4	7.4	20.78	18.18	18.18	sp|Q3T1J1|IF5A1_RAT	Eukaryotic translation initiation factor 5A-1 OS=Rattus norvegicus GN=Eif5a PE=1 SV=3	6	1.08643	0.888152
461	7.33	7.35	12.13	8.151	8.151	tr|Q5XI77|Q5XI77_RAT	Annexin OS=Rattus norvegicus GN=Anxa11 PE=2 SV=1	4	0.717794	0.117474
462	7.31	7.32	17.63	10.79	8.947	sp|P21708|MK03_RAT	Mitogen-activated protein kinase 3 OS=Rattus norvegicus GN=Mapk3 PE=1 SV=5	4	0.990832	0.826754
463	7.27	7.27	12.24	8.634	7.535	tr|F1LRS8|F1LRS8_RAT	Protein Cd2ap (Fragment) OS=Rattus norvegicus GN=Cd2ap PE=4 SV=1	4	1	0.673378
464	7.25	7.25	9.722	8.929	6.944	tr|F1LPM4|F1LPM4_RAT	Amine oxidase [flavin-containing] B OS=Rattus norvegicus GN=Maob PE=4 SV=1	4	0.981748	0.953701
465	7.24	7.5	12.93	10.13	9.052	tr|Q5XIH3|Q5XIH3_RAT	NADH dehydrogenase (Ubiquinone) flavoprotein 1 OS=Rattus norvegicus GN=Ndufv1 PE=2 SV=1	4	0.963829	0.879737
466	7.22	7.27	16.79	11.99	6.715	sp|Q66H98|SDPR_RAT	Serum deprivation-response protein OS=Rattus norvegicus GN=Sdpr PE=1 SV=3	3	1.07647	0.324818
467	7.22	7.22	21.54	14.36	12.31	tr|Q4FZZ4|Q4FZZ4_RAT	Protein LOC100365902 OS=Rattus norvegicus GN=Pdha1 PE=2 SV=1	5	0.963829	0.732369
468	7.2	7.31	16.67	8.681	7.813	tr|F2Z3R6|F2Z3R6_RAT	Septin-9 OS=Rattus norvegicus GN=Sept9 PE=3 SV=1	4	1.0666	0.535979
469	7.15	7.15	35.43	30.71	25.2	sp|Q63396|TCP4_RAT	Activated RNA polymerase II transcriptional coactivator p15 OS=Rattus norvegicus GN=Sub1 PE=2 SV=3	4	1.0666	0.988981
470	7.14	7.21	21.74	19.93	19.93	sp|P28064|PSB8_RAT	Proteasome subunit beta type-8 OS=Rattus norvegicus GN=Psmb8 PE=1 SV=3	5	1.22462	0.679305
471	7.14	7.14	21.72	21.72	21.72	tr|Q6AY18|Q6AY18_RAT	Protein Sar1a OS=Rattus norvegicus GN=Sar1a PE=2 SV=1	4	0.862979	0.416814
472	7.13	7.43	9.56	8.413	7.648	tr|G8JLS7|G8JLS7_RAT	Pre-mRNA-processing factor 19 OS=Rattus norvegicus GN=Prpf19 PE=4 SV=1	4	0.642688	0.328169
473	7.11	7.11	19.6	17.59	17.59	tr|Q6IN37|Q6IN37_RAT	GM2 ganglioside activator OS=Rattus norvegicus GN=Gm2a PE=2 SV=1	4	1.78649	0.2066
474	7.09	7.09	20.4	11.49	11.49	tr|Q4QRB0|Q4QRB0_RAT	Galactose-4-epimerase, UDP, isoform CRA_a OS=Rattus norvegicus GN=Gale PE=2 SV=1	4	1.00925	0.78982
475	6.98	7.17	12.22	9.82	8.144	sp|O08629|TIF1B_RAT	Transcription intermediary factor 1-beta OS=Rattus norvegicus GN=Trim28 PE=1 SV=2	6	1.18032	0.566845
476	6.97	21.86	22.05	16.49	16.32	tr|F1LP60|F1LP60_RAT	Moesin (Fragment) OS=Rattus norvegicus GN=Msn PE=4 SV=1	12	0.937562	0.714711
477	6.96	6.96	28.85	25.64	22.44	tr|F1M764|F1M764_RAT	Uncharacterized protein (Fragment) OS=Rattus norvegicus PE=4 SV=1	4	2.39883	0.63363
478	6.94	6.94	45.05	36.94	24.32	tr|B2RYS2|B2RYS2_RAT	Protein LOC685596 OS=Rattus norvegicus GN=Uqcrb PE=4 SV=1	5	1.5417	0.189626
479	6.9	6.98	10.46	5.23	2.732	tr|G3V7A8|G3V7A8_RAT	Dynactin 1, isoform CRA_a OS=Rattus norvegicus GN=Dctn1 PE=4 SV=1	3	0.990832	0.991989
480	6.9	6.9	34.66	34.66	26.7	tr|D4A0T0|D4A0T0_RAT	Protein Ndufb10 OS=Rattus norvegicus GN=Ndufb10 PE=4 SV=1	4	1.08643	0.779039
481	6.9	6.9	46.05	46.05	46.05	sp|P11951|CX6C2_RAT	Cytochrome c oxidase subunit 6C-2 OS=Rattus norvegicus GN=Cox6c2 PE=1 SV=3	6	1.04713	0.664431
482	6.89	9.07	11.36	9.298	9.298	tr|G3V940|G3V940_RAT	Coronin OS=Rattus norvegicus GN=Coro1b PE=3 SV=1	6	0.963829	0.991323
483	6.87	6.87	15.22	13.66	13.66	tr|Q6AYS2|Q6AYS2_RAT	RCG24191 OS=Rattus norvegicus GN=Sfxn1 PE=2 SV=1	5	1.01859	0.639092
484	6.86	7.11	33.94	33.94	18.18	sp|Q7M0E3|DEST_RAT	Destrin OS=Rattus norvegicus GN=Dstn PE=1 SV=3	3	1.1272	0.681582
485	6.82	6.82	47.33	33.59	28.24	tr|D3ZWT8|D3ZWT8_RAT	ATP synthase subunit d, mitochondrial OS=Rattus norvegicus GN=Atp5h PE=4 SV=1	4	1.2942	0.476042
486	6.82	6.82	25.76	18.18	18.18	tr|F1LZH6|F1LZH6_RAT	Protein Tpd52 (Fragment) OS=Rattus norvegicus GN=Tpd52 PE=4 SV=1	4	1.38038	0.397821
487	6.79	17.44	26.44	12.46	10.73	tr|F1LXC9|F1LXC9_RAT	Protein LOC686567 (Fragment) OS=Rattus norvegicus GN=LOC686567 PE=4 SV=1	10	0.912011	0.623688
488	6.79	8.21	10.82	7.95	3.065	tr|F1LQH7|F1LQH7_RAT	Unconventional myosin-Ic OS=Rattus norvegicus GN=Myo1c PE=4 SV=1	3	0.879022	0.202255
489	6.76	7.48	8.374	3.659	2.195	tr|F8WGA1|F8WGA1_RAT	Cullin-associated NEDD8-dissociated protein 1 OS=Rattus norvegicus GN=Cand1 PE=4 SV=1	3	0.963829	0.996467
490	6.76	6.79	8.958	4.633	3.166	tr|D3ZWP9|D3ZWP9_RAT	Sorbin and SH3 domain-containing protein 2 OS=Rattus norvegicus GN=Sorbs2 PE=4 SV=1	3	1.15878	0.111276
491	6.76	6.76	29.25	29.25	29.25	sp|P02767|TTHY_RAT	Transthyretin OS=Rattus norvegicus GN=Ttr PE=1 SV=1	4	1.07647	0.649087
492	6.67	6.67	13.93	13.93	12.02	sp|Q9JHU5|ARFP1_RAT	Arfaptin-1 OS=Rattus norvegicus GN=Arfip1 PE=2 SV=1	4	0.972747	0.674296
493	6.67	6.67	15.65	14.89	14.89	sp|P08699|LEG3_RAT	Galectin-3 OS=Rattus norvegicus GN=Lgals3 PE=1 SV=4	4	1.14815	0.761769
494	6.65	6.65	9.278	6.415	5.498	sp|Q9QZA2|PDC6I_RAT	Programmed cell death 6-interacting protein OS=Rattus norvegicus GN=Pdcd6ip PE=1 SV=2	5	0.912011	0.671808
495	6.65	6.65	15.35	10.55	10.55	tr|F1LRK8|F1LRK8_RAT	Actin-related protein 3 OS=Rattus norvegicus GN=Actr3 PE=3 SV=1	5	0.816582	0.404607
496	6.63	7.15	9.072	6.724	4.055	sp|P62944|AP2B1_RAT	AP-2 complex subunit beta OS=Rattus norvegicus GN=Ap2b1 PE=1 SV=1	4	0.990832	0.769467
497	6.63	6.63	20.13	9.241	7.591	sp|Q5RKI0|WDR1_RAT	WD repeat-containing protein 1 OS=Rattus norvegicus GN=Wdr1 PE=1 SV=3	4	0.855067	0.576855
498	6.62	6.63	19.24	13.56	10.73	tr|F1LSL1|F1LSL1_RAT	Transcriptional activator protein Pur-beta OS=Rattus norvegicus GN=Purb PE=4 SV=1	4	1	0.75615
499	6.61	6.61	7.964	3.258	2.624	tr|Q9JMB3|Q9JMB3_RAT	Erythrocyte protein band 4.1-like 3, isoform CRA_d OS=Rattus norvegicus GN=Epb41l3 PE=2 SV=1	4	1.28233	0.315349
500	6.61	6.61	10.53	7.131	4.754	tr|Q5XI34|Q5XI34_RAT	Protein Ppp2r1a OS=Rattus norvegicus GN=Ppp2r1a PE=2 SV=1	3	0.990832	0.927757
501	6.6	6.61	12.35	10.93	9.026	tr|G3V796|G3V796_RAT	Acetyl-Coenzyme A dehydrogenase, medium chain OS=Rattus norvegicus GN=Acadm PE=3 SV=1	4	0.981748	0.998802
502	6.6	6.6	34.88	21.86	15.35	tr|F1MA29|F1MA29_RAT	Protein LOC681718 OS=Rattus norvegicus GN=LOC681718 PE=4 SV=1	5	1.02802	0.797382
503	6.59	6.6	15.2	10.35	9.031	tr|G3V6P2|G3V6P2_RAT	Dihydrolipoamide S-succinyltransferase (E2 component of 2-oxo-glutarate complex), isoform CRA_a OS=Rattus norvegicus GN=Dlst PE=3 SV=1	4	0.928966	0.909902
504	6.58	6.58	13.27	6.068	5.31	tr|D3ZQM0|D3ZQM0_RAT	Protein Sf3a1 OS=Rattus norvegicus GN=Sf3a1 PE=4 SV=1	5	0.912011	0.671822
505	6.58	6.58	8.466	6.709	5.591	tr|Q5XIM7|Q5XIM7_RAT	Lysyl-tRNA synthetase OS=Rattus norvegicus GN=Kars PE=2 SV=1	4	0.879022	0.580528
506	6.55	6.61	16.62	12.39	10.42	sp|P04897|GNAI2_RAT	Guanine nucleotide-binding protein G(i) subunit alpha-2 OS=Rattus norvegicus GN=Gnai2 PE=1 SV=3	3	0.83946	0.695942
507	6.54	6.56	34.48	17.24	13.79	tr|F1LT36|F1LT36_RAT	Protein RGD1564698 (Fragment) OS=Rattus norvegicus GN=RGD1564698 PE=4 SV=1	3	0.946237	0.792614
508	6.52	6.66	10.76	2.468	2.024	tr|F1M155|F1M155_RAT	Uncharacterized protein (Fragment) OS=Rattus norvegicus GN=Svil PE=4 SV=1	4	0.895365	0.335327
509	6.51	7.03	13.75	7.358	4.343	tr|F1LV10|F1LV10_RAT	Unconventional myosin-Ia (Fragment) OS=Rattus norvegicus GN=Myo1a PE=4 SV=1	3	1.19124	0.642726
510	6.51	6.51	19.29	10.04	6.496	tr|G3V844|G3V844_RAT	Pancreatic alpha-amylase OS=Rattus norvegicus GN=Amy2 PE=3 SV=1	5	3.34195	0.00822732
511	6.5	6.65	13.02	6.867	4.721	tr|D3ZZH8|D3ZZH8_RAT	Glutamine fructose-6-phosphate transaminase 1, isoform CRA_a OS=Rattus norvegicus GN=Gfpt1 PE=4 SV=1	6	1.10662	0.728086
512	6.5	6.51	10.63	10.63	10.63	tr|D4AEH3|D4AEH3_RAT	Proteasome (Prosome, macropain) 26S subunit, non-ATPase, 7 (Predicted) OS=Rattus norvegicus GN=Psmd7 PE=4 SV=1	4	0.83946	0.420254
513	6.48	6.56	11.93	7.433	1.901	tr|D4A1Z6|D4A1Z6_RAT	Plasma membrane calcium-transporting ATPase 4 OS=Rattus norvegicus GN=Atp2b4 PE=3 SV=1	2	1.02802	0.263612
514	6.48	6.48	9.9	5.268	2.906	tr|G3V888|G3V888_RAT	ATP citrate lyase, isoform CRA_a OS=Rattus norvegicus GN=Acly PE=4 SV=1	3	0.895365	0.24111
515	6.46	9.74	32.93	21.26	19.46	sp|P42123|LDHB_RAT	L-lactate dehydrogenase B chain OS=Rattus norvegicus GN=Ldhb PE=1 SV=2	6	1.25892	0.33304
516	6.46	6.48	8.374	6.119	5.314	tr|D4A2W9|D4A2W9_RAT	Protein Samhd1 OS=Rattus norvegicus GN=Samhd1 PE=4 SV=1	4	0.831764	0.457651
517	6.44	7.64	10.12	8.919	7.719	tr|F1M971|F1M971_RAT	Ubiquilin-1 OS=Rattus norvegicus GN=Ubqln1 PE=4 SV=1	4	1.13763	0.481991
518	6.43	6.43	11.18	7.514	6.358	tr|G3V779|G3V779_RAT	Ladinin (Predicted), isoform CRA_b OS=Rattus norvegicus GN=Lad1 PE=4 SV=1	5	1	0.954857
519	6.42	6.85	15.24	7.479	3.878	tr|D3ZHY1|D3ZHY1_RAT	Threonine--tRNA ligase, cytoplasmic OS=Rattus norvegicus GN=Tars PE=3 SV=1	3	0.57544	0.196659
520	6.41	6.42	29.41	29.41	19.79	sp|P31044|PEBP1_RAT	Phosphatidylethanolamine-binding protein 1 OS=Rattus norvegicus GN=Pebp1 PE=1 SV=3	4	1	0.94934
521	6.39	6.65	18.48	18.48	16.3	tr|D3ZXF9|D3ZXF9_RAT	Protein Mrpl12 OS=Rattus norvegicus GN=Mrpl12 PE=4 SV=1	4	1.1695	0.395135
522	6.37	7.15	6.168	4.112	3.289	sp|B2GUV7|IF2P_RAT	Eukaryotic translation initiation factor 5B OS=Rattus norvegicus GN=Eif5b PE=1 SV=1	4	0.912011	0.861232
523	6.36	6.36	10.63	7.087	4.528	sp|Q505J8|SYFA_RAT	Phenylalanine--tRNA ligase alpha subunit OS=Rattus norvegicus GN=Farsa PE=1 SV=1	3	0.928966	0.755118
524	6.34	6.4	13.19	7.916	6.332	tr|Q6P9U0|Q6P9U0_RAT	Protein Serpinb6a OS=Rattus norvegicus GN=Serpinb6 PE=2 SV=1	3	0.990832	0.922107
525	6.32	6.33	23.56	14.5	12.39	tr|Q4QQV6|Q4QQV6_RAT	Lymphocyte specific 1, isoform CRA_a OS=Rattus norvegicus GN=Lsp1 PE=2 SV=1	5	1.11686	0.457308
526	6.27	6.29	5.671	1.908	1.908	tr|D3ZQN7|D3ZQN7_RAT	Uncharacterized protein OS=Rattus norvegicus GN=Lamb1 PE=4 SV=1	4	1.01859	0.947674
527	6.27	6.27	8.183	5.126	4.586	tr|D4AB03|D4AB03_RAT	Protein Fam120a OS=Rattus norvegicus GN=Fam120a PE=4 SV=1	4	0.981748	0.907564
528	6.23	6.23	16.51	9.809	9.809	sp|Q63570|PRS6B_RAT	26S protease regulatory subunit 6B OS=Rattus norvegicus GN=Psmc4 PE=1 SV=1	4	1.22462	0.594883
529	6.23	6.23	10.07	6.259	5.442	sp|Q63028|ADDA_RAT	Alpha-adducin OS=Rattus norvegicus GN=Add1 PE=1 SV=2	3	1.10662	0.264883
530	6.22	6.22	30.52	25.32	25.32	sp|P07632|SODC_RAT	Superoxide dismutase [Cu-Zn] OS=Rattus norvegicus GN=Sod1 PE=1 SV=2	5	1.24738	0.600052
531	6.19	6.19	20.83	15.91	10.61	tr|D3ZY72|D3ZY72_RAT	Nucleophosmin OS=Rattus norvegicus GN=LOC100363073 PE=4 SV=1	4	1.47231	0.202825
532	6.18	6.18	34.81	34.81	34.81	sp|P11762|LEG1_RAT	Galectin-1 OS=Rattus norvegicus GN=Lgals1 PE=1 SV=2	4	2.26987	0.563555
533	6.16	6.21	19.75	11.78	7.962	sp|Q9WVK7|HCDH_RAT	Hydroxyacyl-coenzyme A dehydrogenase, mitochondrial OS=Rattus norvegicus GN=Hadh PE=2 SV=1	3	0.990832	0.903081
534	6.14	6.17	20.74	13.64	13.64	sp|Q920P6|ADA_RAT	Adenosine deaminase OS=Rattus norvegicus GN=Ada PE=1 SV=3	4	0.990832	0.993105
535	6.12	6.12	48.96	41.67	41.67	tr|B2RZD1|B2RZD1_RAT	Protein Sec61b OS=Rattus norvegicus GN=Sec61b PE=4 SV=1	4	0.981748	0.946137
536	6.12	6.12	29.82	29.82	29.82	tr|F8WFM4|F8WFM4_RAT	VIP peptides OS=Rattus norvegicus GN=Vip PE=4 SV=1	5	0.937562	0.955384
537	6.11	6.11	18.78	10.91	10.91	sp|Q6JE36|NDRG1_RAT	Protein NDRG1 OS=Rattus norvegicus GN=Ndrg1 PE=1 SV=1	3	1.36773	0.562626
538	6.08	6.32	19.33	17.79	12.58	tr|Q4FZS2|Q4FZS2_RAT	Budding uninhibited by benzimidazoles 3 homolog (S. cerevisiae) OS=Rattus norvegicus GN=Bub3 PE=2 SV=1	3	1.04713	0.951126
539	6.06	28.59	48.76	45.39	40.67	sp|P85108|TBB2A_RAT	Tubulin beta-2A chain OS=Rattus norvegicus GN=Tubb2a PE=1 SV=1	23	0.912011	0.865147
540	6.06	6.13	18.07	12.65	12.65	tr|Q9QX81|Q9QX81_RAT	Protein Hnrnpab OS=Rattus norvegicus GN=Hnrnpab PE=2 SV=1	6	1.09648	0.241609
541	6.06	6.06	26.16	15.7	15.7	sp|P63029|TCTP_RAT	Translationally-controlled tumor protein OS=Rattus norvegicus GN=Tpt1 PE=1 SV=1	4	0.946237	0.814274
542	6.06	6.06	25.58	23.72	19.53	tr|B2RYX0|B2RYX0_RAT	Naca protein OS=Rattus norvegicus GN=Naca PE=2 SV=1	4	0.972747	0.918073
543	6.05	6.05	19.09	9.946	7.796	tr|Q3MHS7|Q3MHS7_RAT	GDP-mannose 4, 6-dehydratase OS=Rattus norvegicus GN=Gmds PE=2 SV=1	3	0.49204	0.112488
544	6.04	6.12	9.611	4.988	4.136	sp|Q75WE7|VWA5A_RAT	von Willebrand factor A domain-containing protein 5A OS=Rattus norvegicus GN=Vwa5a PE=2 SV=1	3	1.00925	0.929793
545	6.04	6.1	8.342	3.467	2.709	tr|Q6VPP3|Q6VPP3_RAT	Parturition-related protein PRP3 OS=Rattus norvegicus GN=Clca4 PE=2 SV=1	3	1.6293	0.186833
546	6.04	6.04	28	13.33	11	tr|D3ZZU0|D3ZZU0_RAT	Actin related protein 2/3 complex, subunit 2 (Predicted), isoform CRA_a OS=Rattus norvegicus GN=Arpc2 PE=4 SV=1	3	0.529663	0.268446
547	6.04	6.04	15.74	11.42	9.391	tr|Q6AYD3|Q6AYD3_RAT	Proliferation-associated 2G4 OS=Rattus norvegicus GN=Pa2g4 PE=2 SV=1	3	0.928966	0.626288
548	6.04	6.04	21.49	21.49	21.49	tr|F8WG14|F8WG14_RAT	Eukaryotic translation initiation factor 4H OS=Rattus norvegicus GN=Eif4h PE=4 SV=1	4	0.972747	0.941499
549	6.04	6.04	10.4	8.869	8.869	sp|P62142|PP1B_RAT	Serine/threonine-protein phosphatase PP1-beta catalytic subunit OS=Rattus norvegicus GN=Ppp1cb PE=1 SV=3	3	0.946237	0.918382
550	6.03	6.03	17.66	10.26	10.26	tr|F1LSJ2|F1LSJ2_RAT	Protein M6prbp1 (Fragment) OS=Rattus norvegicus GN=Plin3 PE=4 SV=1	3	1.49969	0.436653
551	6.03	6.03	13.46	9.936	9.936	sp|P02650|APOE_RAT	Apolipoprotein E OS=Rattus norvegicus GN=Apoe PE=1 SV=2	3	0.625173	0.336163
552	6.02	6.04	20.42	8.639	8.639	sp|P20650|PPM1A_RAT	Protein phosphatase 1A OS=Rattus norvegicus GN=Ppm1a PE=1 SV=1	3	0.809096	0.338722
553	6.01	6.41	15.34	15.34	13.64	tr|F1LM19|F1LM19_RAT	Alpha-2-HS-glycoprotein OS=Rattus norvegicus GN=Ahsg PE=4 SV=1	5	1.05682	0.734994
554	6	6.34	13.54	10.95	9.51	sp|P06866|HPT_RAT	Haptoglobin OS=Rattus norvegicus GN=Hp PE=1 SV=3	4	0.809096	0.314596
555	6	6.09	14.24	9.288	9.288	tr|F1M3H7|F1M3H7_RAT	Annexin (Fragment) OS=Rattus norvegicus GN=Anxa3 PE=3 SV=1	3	0.946237	0.861797
556	6	6.03	11.57	7.47	7.47	tr|D4A3N3|D4A3N3_RAT	Alpha-N-acetylgalactosaminidase OS=Rattus norvegicus GN=Naga PE=4 SV=1	3	1.05682	0.946881
557	6	6.03	11.29	8.578	8.578	tr|G3V834|G3V834_RAT	Protein PRRC1 OS=Rattus norvegicus GN=Prrc1 PE=4 SV=1	3	1.92309	0.341164
558	6	6.01	9.403	5.787	5.787	tr|Q6P7A4|Q6P7A4_RAT	Prosaposin OS=Rattus norvegicus GN=Psap PE=2 SV=1	3	1.6293	0.458681
559	6	6	15.13	6.506	4.809	sp|Q5M9G3|CAPR1_RAT	Caprin-1 OS=Rattus norvegicus GN=Caprin1 PE=1 SV=2	3	1.1272	0.752877
560	6	6	10.89	5.941	5.941	sp|Q6AYT3|RTCB_RAT	tRNA-splicing ligase RtcB homolog OS=Rattus norvegicus PE=2 SV=1	3	0.954993	0.924246
561	6	6	15.16	11.55	11.55	tr|F1M978|F1M978_RAT	Inositol monophosphatase 1 OS=Rattus norvegicus GN=Impa1 PE=4 SV=1	3	0.457088	0.238059
562	6	6	10.53	9.053	9.053	tr|Q4V8H5|Q4V8H5_RAT	Aspartyl aminopeptidase OS=Rattus norvegicus GN=Dnpep PE=2 SV=1	4	0.847227	0.200393
563	6	6	14.78	10.43	10.43	tr|D3ZPJ7|D3ZPJ7_RAT	Clathrin light chain A OS=Rattus norvegicus GN=Clta PE=4 SV=1	3	1.20226	0.803132
564	6	6	9.071	8.186	8.186	sp|Q99J82|ILK_RAT	Integrin-linked protein kinase OS=Rattus norvegicus GN=Ilk PE=2 SV=1	3	0.912011	0.539545
565	6	6	11.49	9.579	9.579	sp|P21670|PSA4_RAT	Proteasome subunit alpha type-4 OS=Rattus norvegicus GN=Psma4 PE=1 SV=1	3	0.92045	0.430262
566	6	6	15.41	13.16	13.16	sp|O08699|PGDH_RAT	15-hydroxyprostaglandin dehydrogenase [NAD(+)] OS=Rattus norvegicus GN=Hpgd PE=2 SV=2	5	1.02802	0.674973
567	6	6	28.46	28.46	28.46	tr|B0BMX3|B0BMX3_RAT	Protein S100a16 OS=Rattus norvegicus GN=S100a16 PE=2 SV=1	4	1.11686	0.882882
568	5.97	6.04	11.78	4.956	4.956	sp|Q4FZT9|PSMD2_RAT	26S proteasome non-ATPase regulatory subunit 2 OS=Rattus norvegicus GN=Psmd2 PE=2 SV=1	4	0.751623	0.618145
569	5.96	5.96	6.306	3.767	3.767	tr|D3ZVW3|D3ZVW3_RAT	Protein LOC678741 OS=Rattus norvegicus GN=LOC678741 PE=4 SV=1	3	1.88799	0.446561
570	5.93	5.94	12.81	8.222	6.501	sp|Q9JJ40|NHRF3_RAT	Na(+)/H(+) exchange regulatory cofactor NHE-RF3 OS=Rattus norvegicus GN=Pdzk1 PE=1 SV=2	3	0.972747	0.745184
571	5.92	6.44	9.61	4.026	3.247	sp|P52631|STAT3_RAT	Signal transducer and activator of transcription 3 OS=Rattus norvegicus GN=Stat3 PE=1 SV=1	3	0.981748	0.281765
572	5.89	12.23	31.3	24.39	22.36	sp|P35213|1433B_RAT	14-3-3 protein beta/alpha OS=Rattus norvegicus GN=Ywhab PE=1 SV=3	7	1.04713	0.865528
573	5.89	6.52	15.09	12.98	11.23	tr|I6L9G6|I6L9G6_RAT	Protein Tardbp OS=Rattus norvegicus GN=Tardbp PE=2 SV=1	3	0.963829	0.971651
574	5.89	6.46	12.18	12.18	9.963	sp|P47728|CALB2_RAT	Calretinin OS=Rattus norvegicus GN=Calb2 PE=1 SV=1	3	1.14815	0.46336
575	5.89	5.89	33.79	24.14	19.31	tr|F8WG76|F8WG76_RAT	Ubiquitin-conjugating enzyme E2 variant 2 OS=Rattus norvegicus GN=Ube2v2 PE=4 SV=1	3	1.01859	0.955488
576	5.88	6.61	8.771	3.81	2.732	tr|D3ZUK8|D3ZUK8_RAT	Protein Clip1 OS=Rattus norvegicus GN=Clip1 PE=4 SV=1	3	1.08643	0.859047
577	5.87	5.87	11.73	8	8	sp|Q29YR5-2|ST2B1_RAT	Isoform 2 of Sulfotransferase family cytosolic 2B member 1 OS=Rattus norvegicus GN=Sult2b1	4	0.972747	0.957566
578	5.86	5.86	14.61	12.03	9.169	sp|Q6AYC4|CAPG_RAT	Macrophage-capping protein OS=Rattus norvegicus GN=Capg PE=1 SV=1	3	1.38038	0.46518
579	5.85	7.72	12.91	5.514	4.637	sp|P18395|CSDE1_RAT	Cold shock domain-containing protein E1 OS=Rattus norvegicus GN=Csde1 PE=2 SV=1	4	0.903649	0.348223
580	5.85	5.85	7.143	4.708	4.708	tr|Q66HF3|Q66HF3_RAT	Electron transfer flavoprotein-ubiquinone oxidoreductase, mitochondrial OS=Rattus norvegicus GN=Etfdh PE=2 SV=1	3	0.954993	0.834714
581	5.84	6.93	21.39	13.29	10.4	sp|P07150|ANXA1_RAT	Annexin A1 OS=Rattus norvegicus GN=Anxa1 PE=1 SV=2	4	0.751623	0.547263
582	5.84	5.86	12.36	10.11	8.614	tr|F1MA28|F1MA28_RAT	UDP-glucuronosyltransferase 1-1 OS=Rattus norvegicus GN=Ugt1a1 PE=4 SV=1	4	0.487529	0.132583
583	5.82	5.82	9.174	7.951	7.951	sp|P38918|ARK73_RAT	Aflatoxin B1 aldehyde reductase member 3 OS=Rattus norvegicus GN=Akr7a3 PE=1 SV=2	4	1.94089	0.421437
584	5.8	7.98	12.44	4.728	4.111	tr|D4AAJ4|D4AAJ4_RAT	Protein Ppp1r12b OS=Rattus norvegicus GN=Ppp1r12b PE=4 SV=1	4	1.10662	0.351651
585	5.79	9.34	5.401	2.226	1.931	tr|D4A054|D4A054_RAT	Protein Ranbp2 OS=Rattus norvegicus GN=Ranbp2 PE=1 SV=1	6	0.83946	0.444003
586	5.79	6	13.45	10.76	6.646	sp|P08461|ODP2_RAT	Dihydrolipoyllysine-residue acetyltransferase component of pyruvate dehydrogenase complex, mitochondrial OS=Rattus norvegicus GN=Dlat PE=1 SV=3	3	0.946237	0.731531
587	5.77	5.77	13.28	11.07	11.07	tr|F1LNT4|F1LNT4_RAT	3-hydroxyacyl-CoA dehydrogenase type-2 OS=Rattus norvegicus GN=Hsd17b10 PE=3 SV=1	4	1.02802	0.967737
588	5.73	5.73	15.38	12.15	12.15	sp|P08426|TRY3_RAT	Cationic trypsin-3 OS=Rattus norvegicus GN=Try3 PE=2 SV=1	8	1.07647	0.651154
589	5.71	5.71	28.89	28.89	17.78	sp|P61751|ARF4_RAT	ADP-ribosylation factor 4 OS=Rattus norvegicus GN=Arf4 PE=2 SV=2	3	0.515229	0.266024
590	5.7	5.7	15.97	11.76	7.983	sp|Q63798|PSME2_RAT	Proteasome activator complex subunit 2 OS=Rattus norvegicus GN=Psme2 PE=2 SV=3	4	0.954993	0.993066
591	5.69	5.69	11.16	8.842	7.579	tr|F2Z3T9|F2Z3T9_RAT	Protein LOC690372 OS=Rattus norvegicus GN=LOC690372 PE=4 SV=1	3	1.13763	0.521577
592	5.69	5.69	8.438	5.386	5.386	sp|Q6AYK3|INO1_RAT	Inositol-3-phosphate synthase 1 OS=Rattus norvegicus GN=Isyna1 PE=2 SV=2	4	0.862979	0.675606
593	5.68	10.49	26	24	21.5	sp|P35281|RAB10_RAT	Ras-related protein Rab-10 OS=Rattus norvegicus GN=Rab10 PE=1 SV=1	5	0.376704	0.24374
594	5.63	7.68	22	16.4	13.2	sp|Q5RK30|SBDS_RAT	Ribosome maturation protein SBDS OS=Rattus norvegicus GN=Sbds PE=2 SV=1	4	0.912011	0.554588
595	5.63	5.65	17.96	8.982	7.485	tr|E9PTR4|E9PTR4_RAT	Protein Atp8b2 OS=Rattus norvegicus GN=Atp8b2 PE=4 SV=1	3	1.18032	0.382029
596	5.57	8.39	12.05	8.286	6.215	tr|Q3MHS9|Q3MHS9_RAT	Chaperonin containing Tcp1, subunit 6A (Zeta 1) OS=Rattus norvegicus GN=Cct6a PE=2 SV=1	4	0.510505	0.140614
597	5.56	5.66	7.708	5.105	5.105	tr|F1LSS0|F1LSS0_RAT	Golgin subfamily A member 2 OS=Rattus norvegicus GN=Golga2 PE=4 SV=1	4	1.51356	0.353569
598	5.54	5.54	14.11	11.88	9.653	sp|Q3MIE4|VAT1_RAT	Synaptic vesicle membrane protein VAT-1 homolog OS=Rattus norvegicus GN=Vat1 PE=1 SV=1	3	0.887156	0.831353
599	5.53	7.07	7.573	4.389	3.873	tr|F1LSR5|F1LSR5_RAT	Integrin alpha-1 (Fragment) OS=Rattus norvegicus GN=Itga1 PE=3 SV=1	4	1.01859	0.946165
600	5.53	5.53	14.77	11.41	11.41	tr|D3ZVB7|D3ZVB7_RAT	Osteoglycin (Predicted) OS=Rattus norvegicus GN=Ogn PE=4 SV=1	5	0.570164	0.273714
601	5.52	11.72	31.45	27.82	23.79	sp|Q63610|TPM3_RAT	Tropomyosin alpha-3 chain OS=Rattus norvegicus GN=Tpm3 PE=1 SV=2	10	1.08643	0.955017
602	5.51	5.75	21.17	13.09	11.7	tr|B1WC26|B1WC26_RAT	N-acetylneuraminic acid synthase OS=Rattus norvegicus GN=Nans PE=2 SV=1	4	0.937562	0.928844
603	5.51	5.51	38	27	27	tr|D4A1G4|D4A1G4_RAT	Cytochrome b5 OS=Rattus norvegicus GN=Cyb5a PE=3 SV=1	5	1.52757	0.402017
604	5.49	7.86	9.091	8.058	7.025	tr|G3V9W6|G3V9W6_RAT	Aldehyde dehydrogenase OS=Rattus norvegicus GN=Aldh3a2 PE=3 SV=1	4	0.847227	0.402707
605	5.49	5.52	15.15	13.26	13.26	sp|P22734|COMT_RAT	Catechol O-methyltransferase OS=Rattus norvegicus GN=Comt PE=1 SV=2	3	1.1272	0.652429
606	5.49	5.51	8.601	3.899	3.899	tr|D4A450|D4A450_RAT	Protein Bclaf1 OS=Rattus norvegicus GN=Bclaf1 PE=4 SV=1	3	1.01859	0.966364
607	5.49	5.49	11.59	10.16	8.095	tr|G8JLR0|G8JLR0_RAT	Dolichyl-diphosphooligosaccharide--protein glycosyltransferase subunit 2 (Fragment) OS=Rattus norvegicus GN=Rpn2 PE=4 SV=1	5	0.83946	0.806498
608	5.47	5.47	30.51	23.73	23.73	sp|P80254|DOPD_RAT	D-dopachrome decarboxylase OS=Rattus norvegicus GN=Ddt PE=1 SV=3	4	1.0666	0.697103
609	5.46	5.46	23.3	16.5	16.5	tr|D3ZRQ2|D3ZRQ2_RAT	Tumor protein D52-like 2, isoform CRA_h OS=Rattus norvegicus GN=Tpd52l2 PE=4 SV=1	3	1.13763	0.164307
610	5.46	5.46	17.43	14.52	14.52	sp|P11348|DHPR_RAT	Dihydropteridine reductase OS=Rattus norvegicus GN=Qdpr PE=1 SV=1	3	1.02802	0.667698
611	5.45	6.54	12.17	5.392	2.778	tr|G3V6T1|G3V6T1_RAT	Protein Copa OS=Rattus norvegicus GN=Copa PE=4 SV=1	4	0.363078	0.0241208
612	5.44	18.61	31.21	27.85	27.85	tr|Q6P9Y4|Q6P9Y4_RAT	ADP/ATP translocase 1 OS=Rattus norvegicus GN=Slc25a4 PE=2 SV=1	13	0.619441	0.42055
613	5.44	5.53	27.92	22.84	19.8	sp|Q792I0|LIN7C_RAT	Protein lin-7 homolog C OS=Rattus norvegicus GN=Lin7c PE=1 SV=1	3	1.02802	0.916475
614	5.43	5.43	21.95	12.2	12.2	sp|P60901|PSA6_RAT	Proteasome subunit alpha type-6 OS=Rattus norvegicus GN=Psma6 PE=1 SV=1	4	1.00925	0.990437
615	5.41	6.91	34.21	30.26	15.13	sp|Q9EQX9|UBE2N_RAT	Ubiquitin-conjugating enzyme E2 N OS=Rattus norvegicus GN=Ube2n PE=1 SV=1	4	1.21339	0.510103
616	5.4	5.41	13.27	13.27	10.68	tr|D3ZRJ6|D3ZRJ6_RAT	Protein Gpa33 OS=Rattus norvegicus GN=Gpa33 PE=4 SV=1	3	1.30617	0.408129
617	5.39	5.39	19.92	19.92	14.18	tr|G8JLQ4|G8JLQ4_RAT	Endoplasmic reticulum resident protein 29 (Fragment) OS=Rattus norvegicus GN=Erp29 PE=4 SV=1	4	1.43219	0.166157
618	5.38	5.38	8	6.857	4.19	tr|B1WC34|B1WC34_RAT	Protein Prkcsh OS=Rattus norvegicus GN=Prkcsh PE=2 SV=1	3	1.23595	0.224769
619	5.38	5.38	10.37	7.037	7.037	tr|G3V8I1|G3V8I1_RAT	Alkaline phosphatase OS=Rattus norvegicus GN=Alpi PE=3 SV=1	4	0.765597	0.308551
620	5.37	7.69	19.95	17.21	8.47	tr|G3V618|G3V618_RAT	Mitogen activated protein kinase 13 OS=Rattus norvegicus GN=Mapk13 PE=4 SV=1	3	0.824138	0.674937
621	5.37	5.37	12.55	12.55	10.12	tr|Q5PPH9|Q5PPH9_RAT	Acidic (Leucine-rich) nuclear phosphoprotein 32 family, member A OS=Rattus norvegicus GN=Anp32a PE=2 SV=1	2	1.04713	0.938263
622	5.33	9.18	40.63	35.94	20.94	tr|Q5I0M7|Q5I0M7_RAT	Heterogeneous nuclear ribonucleoprotein A1 OS=Rattus norvegicus GN=Hnrnpa1 PE=2 SV=1	8	1.1272	0.23819
623	5.33	5.43	18.79	8.788	8.788	tr|F1M7H9|F1M7H9_RAT	Protein Luc7l2 (Fragment) OS=Rattus norvegicus GN=Luc7l2 PE=4 SV=1	4	1.09648	0.829642
624	5.32	5.36	8.7	4.094	3.48	tr|D3ZUY8|D3ZUY8_RAT	Adaptor protein complex AP-2, alpha 1 subunit (Predicted) OS=Rattus norvegicus GN=Ap2a1 PE=4 SV=1	3	0.895365	0.840155
625	5.32	5.32	31.12	22.41	22.41	sp|Q9Z339|GSTO1_RAT	Glutathione S-transferase omega-1 OS=Rattus norvegicus GN=Gsto1 PE=1 SV=2	5	0.862979	0.507544
626	5.31	5.31	19.09	13.44	11.29	tr|F8WG47|F8WG47_RAT	NSFL1 cofactor p47 OS=Rattus norvegicus GN=Nsfl1c PE=4 SV=1	3	0.972747	0.887649
627	5.3	10.75	23.42	17.41	17.41	tr|G3V786|G3V786_RAT	Protein Akr1b8 OS=Rattus norvegicus GN=Akr1b8 PE=4 SV=1	6	1.28233	0.609811
628	5.3	5.32	10.29	4.39	4.39	tr|D3ZAY8|D3ZAY8_RAT	Protein Pnn OS=Rattus norvegicus GN=Pnn PE=4 SV=1	3	0.704693	0.540178
629	5.28	6.15	20.09	13.63	9.469	tr|G3V7L6|G3V7L6_RAT	26S protease regulatory subunit 7 OS=Rattus norvegicus GN=Psmc2 PE=3 SV=1	3	0.981748	0.653771
630	5.26	6.61	8.185	6.506	4.827	sp|P23514|COPB_RAT	Coatomer subunit beta OS=Rattus norvegicus GN=Copb1 PE=1 SV=1	4	0.903649	0.727776
631	5.25	5.29	13.62	10.39	10.39	tr|F1M3K0|F1M3K0_RAT	Protein Suclg2 (Fragment) OS=Rattus norvegicus GN=Suclg2 PE=4 SV=1	3	0.879022	0.59302
632	5.25	5.25	9.122	3.58	2.771	tr|D3ZQ20|D3ZQ20_RAT	Dynamin-2 OS=Rattus norvegicus GN=Dnm2 PE=3 SV=1	3	0.928966	0.927577
633	5.24	5.27	21.38	16.12	11.84	sp|P07340|AT1B1_RAT	Sodium/potassium-transporting ATPase subunit beta-1 OS=Rattus norvegicus GN=Atp1b1 PE=1 SV=1	5	0.591562	0.424736
634	5.24	5.24	10.2	10.2	10.2	tr|Q6MG98|Q6MG98_RAT	Histocompatibility 2, class II antigen E alpha OS=Rattus norvegicus GN=RT1-Da PE=2 SV=1	3	0.870964	0.573419
635	5.2	5.2	22.92	18.23	18.23	sp|P17077|RL9_RAT	60S ribosomal protein L9 OS=Rattus norvegicus GN=Rpl9 PE=1 SV=1	4	1.03753	0.979532
636	5.19	5.19	14.05	9.477	9.477	sp|Q9R1T3|CATZ_RAT	Cathepsin Z OS=Rattus norvegicus GN=Ctsz PE=1 SV=2	6	1.31826	0.391578
637	5.17	7.45	16.05	9.197	9.197	tr|D3ZLC1|D3ZLC1_RAT	Protein Lmnb2 OS=Rattus norvegicus GN=Lmnb2 PE=4 SV=1	5	1.1695	0.476927
638	5.16	6	8.835	5.823	2.811	tr|D3ZSM1|D3ZSM1_RAT	Protein Epb4.1l2 OS=Rattus norvegicus GN=Epb4.1l2 PE=4 SV=1	3	1.1695	0.762209
639	5.16	5.16	18.93	9.467	8.284	tr|F1LQ84|F1LQ84_RAT	Protein Ugp2 (Fragment) OS=Rattus norvegicus GN=Ugp2 PE=4 SV=1	4	0.586138	0.317539
640	5.14	5.21	17.69	13	13	tr|D3ZCX0|D3ZCX0_RAT	Protein Rsu1 OS=Rattus norvegicus GN=Rsu1 PE=4 SV=1	3	0.928966	0.144978
641	5.13	5.14	13.56	5.047	2.629	sp|Q5M7V8|TR150_RAT	Thyroid hormone receptor-associated protein 3 OS=Rattus norvegicus GN=Thrap3 PE=1 SV=1	3	1.18032	0.577578
642	5.12	5.14	15.97	10.65	10.65	sp|P29826|HB2B_RAT	Rano class II histocompatibility antigen, B-1 beta chain OS=Rattus norvegicus GN=RT1-Bb PE=2 SV=1	3	1.04713	0.834293
643	5.12	5.12	33.61	29.51	22.95	tr|D3ZX38|D3ZX38_RAT	Prefoldin 1 (Predicted) OS=Rattus norvegicus GN=Pfdn1 PE=4 SV=1	3	1.49969	0.08457
644	5.11	5.11	18.29	12.39	7.375	tr|G3V6S8|G3V6S8_RAT	Protein Sfrs6 OS=Rattus norvegicus GN=Sfrs6 PE=4 SV=1	3	1.0666	0.715533
645	5.09	5.09	15.45	12.47	8.13	sp|Q8VHT6|AS3MT_RAT	Arsenite methyltransferase OS=Rattus norvegicus GN=As3mt PE=1 SV=1	3	0.809096	0.2439
646	5.07	5.07	30.77	20.51	20.51	tr|G3V6P6|G3V6P6_RAT	Putative RNA-binding protein 3 OS=Rattus norvegicus GN=Rbm3 PE=4 SV=1	4	0.654636	0.40395
647	5.06	5.1	7.873	3.878	3.878	tr|F1M6X7|F1M6X7_RAT	Rho GTPase-activating protein 17 OS=Rattus norvegicus GN=Arhgap17 PE=4 SV=1	3	0.870964	0.852769
648	5.06	5.06	7.241	6.262	6.262	sp|P62815|VATB2_RAT	V-type proton ATPase subunit B, brain isoform OS=Rattus norvegicus GN=Atp6v1b2 PE=1 SV=1	3	0.765597	0.532246
649	5.04	5.04	19.82	12.43	9.467	tr|F1LN61|F1LN61_RAT	Uncharacterized protein (Fragment) OS=Rattus norvegicus PE=4 SV=1	3	0.744732	0.298687
650	5.03	5.65	9.929	9.22	4.433	tr|G3V7G9|G3V7G9_RAT	Eukaryotic translation initiation factor 3, subunit 6 interacting protein OS=Rattus norvegicus GN=Eif3s6ip PE=4 SV=1	3	0.474242	0.0768519
651	5.01	6.07	8.134	6.079	3.682	tr|F1M6H4|F1M6H4_RAT	Uncharacterized protein (Fragment) OS=Rattus norvegicus PE=4 SV=1	4	1.11686	0.450496
652	5	5	22.77	20.98	14.73	tr|G3V6L9|G3V6L9_RAT	Peptidyl-prolyl cis-trans isomerase OS=Rattus norvegicus GN=Fkbp3 PE=4 SV=1	3	1.41906	0.247243
653	4.99	4.99	8.668	5.698	3.692	tr|F1LM84|F1LM84_RAT	Nidogen-1 OS=Rattus norvegicus GN=Nid1 PE=4 SV=1	4	0.831764	0.421364
654	4.97	6.21	13.99	9.074	4.915	tr|F1LR90|F1LR90_RAT	Adenosylhomocysteinase OS=Rattus norvegicus GN=Ahcyl1 PE=3 SV=1	4	0.801678	0.525399
655	4.95	4.95	7.813	5.382	5.382	tr|F8WFZ3|F8WFZ3_RAT	Epsin-1 OS=Rattus norvegicus GN=Epn1 PE=4 SV=1	3	1.09648	0.755676
656	4.94	4.95	46.43	26.79	26.79	tr|A9UMV9|A9UMV9_RAT	Ndufa7 protein OS=Rattus norvegicus GN=Ndufa7 PE=4 SV=1	3	1.0666	0.686972
657	4.93	4.93	12.69	11.48	11.48	sp|D4A4T9|CHRD1_RAT	Cysteine and histidine-rich domain-containing protein 1 OS=Rattus norvegicus GN=Chordc1 PE=3 SV=1	3	0.831764	0.711407
658	4.91	4.91	17.35	15.53	15.53	tr|Q6MGA6|Q6MGA6_RAT	Proteasome subunit beta type OS=Rattus norvegicus GN=Psmb9 PE=2 SV=1	3	1.03753	0.866248
659	4.9	4.9	7.169	5.515	5.515	sp|P35465|PAK1_RAT	Serine/threonine-protein kinase PAK 1 OS=Rattus norvegicus GN=Pak1 PE=1 SV=3	3	1.03753	0.780666
660	4.89	4.89	35.29	35.29	35.29	sp|Q5BJP3|UFM1_RAT	Ubiquitin-fold modifier 1 OS=Rattus norvegicus GN=Ufm1 PE=2 SV=1	3	1.2942	0.251449
661	4.87	5.85	10.33	4.514	2.407	sp|Q2TA68-3|OPA1_RAT	Isoform 3 of Dynamin-like 120 kDa protein, mitochondrial OS=Rattus norvegicus GN=Opa1	3	0.972747	0.92802
662	4.85	5.4	13.04	8.275	5.75	tr|F1LPH1|F1LPH1_RAT	Calpastatin OS=Rattus norvegicus GN=Cast PE=4 SV=1	3	1.21339	0.538252
663	4.83	4.83	13.83	9.362	4.468	tr|D4AEK9|D4AEK9_RAT	Protein Ccdc6 OS=Rattus norvegicus GN=Ccdc6 PE=4 SV=1	2	1.28233	0.179195
664	4.82	4.83	23.76	17.68	13.26	sp|Q62785|HAP28_RAT	28 kDa heat- and acid-stable phosphoprotein OS=Rattus norvegicus GN=Pdap1 PE=1 SV=1	2	1.1272	0.335004
665	4.82	4.82	11.01	6.292	6.292	sp|Q641X8|EIF3E_RAT	Eukaryotic translation initiation factor 3 subunit E OS=Rattus norvegicus GN=Eif3e PE=2 SV=1	3	0.92045	0.956201
666	4.79	4.84	10.88	9.123	5.965	tr|E9PTI6|E9PTI6_RAT	Protein Raly OS=Rattus norvegicus GN=Raly PE=4 SV=1	2	0.895365	0.658413
667	4.79	4.79	8.586	6.313	6.313	sp|A0JPJ7|OLA1_RAT	Obg-like ATPase 1 OS=Rattus norvegicus GN=Ola1 PE=2 SV=1	3	1.00925	0.621487
668	4.78	4.79	14.29	10.71	9.034	tr|Q68FX4|Q68FX4_RAT	Hematopoietic cell specific Lyn substrate 1 OS=Rattus norvegicus GN=Hcls1 PE=2 SV=1	3	0.972747	0.756544
669	4.77	6.34	5.802	1.834	0.7937	tr|F1LQH0|F1LQH0_RAT	Dystrophin (Fragment) OS=Rattus norvegicus GN=Dmd PE=4 SV=1	3	1.14815	0.631282
670	4.77	4.77	35.75	32.12	24.35	sp|P47875|CSRP1_RAT	Cysteine and glycine-rich protein 1 OS=Rattus norvegicus GN=Csrp1 PE=2 SV=2	6	0.704693	0.50887
671	4.75	5.74	13.47	4.961	3.969	tr|F1LUA1|F1LUA1_RAT	Protein Eea1 (Fragment) OS=Rattus norvegicus GN=Eea1 PE=4 SV=1	4	0.963829	0.932156
672	4.75	4.94	8.042	5.185	3.175	sp|P50123|AMPE_RAT	Glutamyl aminopeptidase OS=Rattus norvegicus GN=Enpep PE=1 SV=2	4	1.97697	0.229509
673	4.74	7.03	19.22	15.57	12.65	sp|Q3B8Q2|IF4A3_RAT	Eukaryotic initiation factor 4A-III OS=Rattus norvegicus GN=Eif4a3 PE=1 SV=1	6	0.912011	0.535336
674	4.72	4.78	13.39	11.16	8.036	sp|Q5U2R7|MESD_RAT	LDLR chaperone MESD OS=Rattus norvegicus GN=Mesdc2 PE=2 SV=1	2	0.887156	0.192838
675	4.72	4.72	22.9	14.14	12.12	sp|P09895|RL5_RAT	60S ribosomal protein L5 OS=Rattus norvegicus GN=Rpl5 PE=1 SV=3	3	1	0.635575
676	4.69	4.69	22.16	19.16	15.57	sp|Q8CJD3|ZG16_RAT	Zymogen granule membrane protein 16 OS=Rattus norvegicus GN=Zg16 PE=2 SV=1	5	0.77983	0.513513
677	4.67	4.68	11.33	8.867	5.665	tr|F2Z3S1|F2Z3S1_RAT	Protein Dazap1 OS=Rattus norvegicus GN=Dazap1 PE=4 SV=1	2	1.48594	0.401423
678	4.67	4.67	46.99	37.35	37.35	sp|P35171|CX7A2_RAT	Cytochrome c oxidase subunit 7A2, mitochondrial OS=Rattus norvegicus GN=Cox7a2 PE=1 SV=1	4	1.36773	0.514706
679	4.66	7.65	27.03	21.62	12.16	sp|P04903|GSTA2_RAT	Glutathione S-transferase alpha-2 OS=Rattus norvegicus GN=Gsta2 PE=2 SV=2	3	0.954993	0.988156
680	4.65	4.65	26.15	18.46	13.85	tr|D3ZZC7|D3ZZC7_RAT	Protein LOC100364657 OS=Rattus norvegicus GN=Rps15a-ps2 PE=3 SV=1	3	0.737904	0.556697
681	4.63	4.63	24.25	12.31	10.07	sp|Q66HR2|MARE1_RAT	Microtubule-associated protein RP/EB family member 1 OS=Rattus norvegicus GN=Mapre1 PE=1 SV=3	2	1	0.826822
682	4.63	4.63	41.46	36.59	26.83	sp|Q7TQ16|QCR8_RAT	Cytochrome b-c1 complex subunit 8 OS=Rattus norvegicus GN=Uqcrq PE=2 SV=1	3	0.903649	0.430692
683	4.6	4.6	15.48	8.333	8.333	tr|D3Z982|D3Z982_RAT	Protein Sfrs2 OS=Rattus norvegicus GN=Sfrs2 PE=4 SV=1	4	1.25892	0.554616
684	4.6	4.6	14.23	12.69	12.69	tr|Q6PCU4|Q6PCU4_RAT	Emd protein OS=Rattus norvegicus GN=Emd PE=2 SV=1	3	1.36773	0.229002
685	4.59	4.59	5.114	1.986	1.479	tr|D4ACB7|D4ACB7_RAT	Protein LOC100360302 OS=Rattus norvegicus GN=LOC100360302 PE=4 SV=1	3	1.13763	0.511733
686	4.58	4.58	14.39	8.144	8.144	tr|F1SW39|F1SW39_RAT	PC4 and SFRS1 interacting protein 1 OS=Rattus norvegicus GN=SBP75 PE=2 SV=1	4	1.08643	0.845533
687	4.55	4.55	31.98	13.37	13.37	tr|F8WFW6|F8WFW6_RAT	40S ribosomal protein S16 (Fragment) OS=Rattus norvegicus GN=Rps16 PE=3 SV=1	3	0.801678	0.252156
688	4.54	5.85	19.54	10.66	7.36	sp|Q5M7U6|ARP2_RAT	Actin-related protein 2 OS=Rattus norvegicus GN=Actr2 PE=1 SV=1	3	0.57544	0.461152
689	4.54	4.99	9.518	6.599	4.822	sp|P47860|K6PP_RAT	6-phosphofructokinase type C OS=Rattus norvegicus GN=Pfkp PE=1 SV=2	3	0.816582	0.428978
690	4.53	4.56	16.54	12.6	12.6	tr|F1LSQ6|F1LSQ6_RAT	Proteasome subunit alpha type OS=Rattus norvegicus GN=Psma7 PE=3 SV=1	4	0.928966	0.891813
691	4.53	4.53	22.07	17.93	13.79	tr|F1LZC5|F1LZC5_RAT	Protein Ndufa13 (Fragment) OS=Rattus norvegicus GN=Ndufa13 PE=4 SV=1	2	0.937562	0.781944
692	4.52	4.56	50.57	45.98	39.08	sp|P11030|ACBP_RAT	Acyl-CoA-binding protein OS=Rattus norvegicus GN=Dbi PE=1 SV=3	4	1.36773	0.321998
693	4.52	4.52	17.58	15.38	9.158	sp|Q4KM35|PSB10_RAT	Proteasome subunit beta type-10 OS=Rattus norvegicus GN=Psmb10 PE=2 SV=1	2	0.981748	0.885086
694	4.49	4.49	7.427	4.079	2.301	tr|F8WFI9|F8WFI9_RAT	Eukaryotic translation initiation factor 3 subunit B OS=Rattus norvegicus GN=Eif3b PE=3 SV=1	2	0.92045	0.849294
695	4.48	4.48	12.16	9.91	9.91	tr|D3ZJS0|D3ZJS0_RAT	Membrane-associated progesterone receptor component 1 OS=Rattus norvegicus GN=Pgrmc1 PE=4 SV=1	3	1.02802	0.81134
696	4.46	4.46	20.78	12.21	7.792	sp|Q68FX0|IDH3B_RAT	Isocitrate dehydrogenase [NAD] subunit beta, mitochondrial OS=Rattus norvegicus GN=Idh3B PE=1 SV=1	2	0.83946	0.669034
697	4.43	4.85	12.98	11.21	9.735	sp|B5DEH2|ERLN2_RAT	Erlin-2 OS=Rattus norvegicus GN=Erlin2 PE=1 SV=1	3	0.83946	0.691043
698	4.43	4.47	12.01	7.108	7.108	tr|F1LPB1|F1LPB1_RAT	Protein Hars (Fragment) OS=Rattus norvegicus GN=Hars PE=4 SV=1	3	1.10662	0.818495
699	4.43	4.43	5.126	3.448	2.423	tr|G3V7L9|G3V7L9_RAT	Leucine zipper protein 1 OS=Rattus norvegicus GN=Luzp1 PE=4 SV=1	3	1.08643	0.576603
700	4.43	4.43	8.736	4.461	4.461	tr|F1LR87|F1LR87_RAT	Beta-hexosaminidase subunit beta OS=Rattus norvegicus GN=Hexb PE=4 SV=1	3	0.912011	0.856334
701	4.42	5.93	10.06	7.59	5.313	tr|D3ZUC9|D3ZUC9_RAT	Oxidative-stress responsive 1 (Predicted) OS=Rattus norvegicus GN=Oxsr1 PE=4 SV=1	3	1.03753	0.836137
702	4.42	4.42	17.62	10.34	10.34	sp|P04961|PCNA_RAT	Proliferating cell nuclear antigen OS=Rattus norvegicus GN=Pcna PE=1 SV=1	3	1	0.939604
703	4.4	4.4	11.95	4.403	4.403	tr|D3ZMF5|D3ZMF5_RAT	Very long-chain-specific acyl-CoA dehydrogenase, mitochondrial OS=Rattus norvegicus GN=Acadvl PE=3 SV=1	3	0.862979	0.707129
704	4.38	4.38	11.57	9.496	6.825	tr|G3V6D9|G3V6D9_RAT	Na(+)/H(+) exchange regulatory cofactor NHE-RF2 OS=Rattus norvegicus GN=Slc9a3r2 PE=4 SV=1	2	1.00925	0.95548
705	4.37	4.37	13.3	13.3	9.852	tr|D4A2G9|D4A2G9_RAT	Protein Ranbp1 OS=Rattus norvegicus GN=RGD1565297 PE=4 SV=1	3	1	0.920736
706	4.35	4.36	7.327	5.743	3.663	tr|G3V918|G3V918_RAT	Phosphoribosylglycinamide formyltransferase, isoform CRA_a OS=Rattus norvegicus GN=Gart PE=3 SV=1	4	0.937562	0.764283
707	4.35	4.35	17.31	9.936	7.051	sp|Q66H71|CPPED_RAT	Calcineurin-like phosphoesterase domain-containing protein 1 OS=Rattus norvegicus GN=Cpped1 PE=2 SV=1	3	0.744732	0.544673
708	4.34	4.34	6.679	4.709	4.277	tr|F1MAQ7|F1MAQ7_RAT	Protein Son OS=Rattus norvegicus GN=Son PE=4 SV=1	5	1.25892	0.635895
709	4.33	4.33	8.172	6.667	5.161	tr|Q5M7T5|Q5M7T5_RAT	Protein Serpinc1 OS=Rattus norvegicus GN=Serpinc1 PE=2 SV=1	2	1.30617	0.6144
710	4.32	5.11	15.98	9.021	6.959	sp|P84586|RMXRL_RAT	RNA-binding motif protein, X chromosome retrogene-like OS=Rattus norvegicus GN=Rbmxrtl PE=3 SV=1	3	1	0.82413
711	4.32	4.34	14.11	12.45	12.45	tr|Q6P9V6|Q6P9V6_RAT	Proteasome subunit alpha type OS=Rattus norvegicus GN=Psma5 PE=2 SV=1	3	1.19124	0.556604
712	4.32	4.32	22.77	16.83	16.83	tr|D3ZTB5|D3ZTB5_RAT	Protein S100a13 OS=Rattus norvegicus GN=S100a13 PE=4 SV=1	3	0.972747	0.920031
713	4.3	4.3	19.33	19.33	19.33	sp|P07151|B2MG_RAT	Beta-2-microglobulin OS=Rattus norvegicus GN=B2m PE=1 SV=1	3	0.972747	0.909573
714	4.29	5.17	9.737	2.873	1.915	tr|D4A8H8|D4A8H8_RAT	Cytoplasmic FMR1 interacting protein 1 (Predicted) OS=Rattus norvegicus GN=Cyfip1 PE=4 SV=1	2	0.60256	0.10243
715	4.28	4.28	13.01	10.78	7.807	tr|F1LMK1|F1LMK1_RAT	3'(2'),5'-bisphosphate nucleotidase 1 (Fragment) OS=Rattus norvegicus GN=Bpnt1 PE=4 SV=1	3	0.758578	0.564287
716	4.28	4.28	26.35	20.27	14.19	tr|D3Z9B0|D3Z9B0_RAT	Protein Glod5 OS=Rattus norvegicus GN=Glod5 PE=4 SV=1	2	1	0.925211
717	4.27	4.31	11.63	7.756	6.094	sp|Q64640|ADK_RAT	Adenosine kinase OS=Rattus norvegicus GN=Adk PE=1 SV=3	2	0.895365	0.42521
718	4.27	4.27	39.06	27.34	27.34	tr|G3V6H6|G3V6H6_RAT	Fatty acid binding protein 6, ileal (Gastrotropin) OS=Rattus norvegicus GN=Fabp6 PE=4 SV=1	4	16.293	0.0996002
719	4.26	5.31	17.22	7.652	3.304	tr|D3ZH41|D3ZH41_RAT	Protein Ckap4 OS=Rattus norvegicus GN=Ckap4 PE=4 SV=1	3	1.09648	0.689557
720	4.26	4.44	6.157	2.745	1.706	tr|D3ZKG9|D3ZKG9_RAT	Protein RGD1307222 OS=Rattus norvegicus GN=RGD1307222 PE=3 SV=1	2	0.972747	0.802714
721	4.26	4.26	40.21	26.8	17.53	tr|D3ZS58|D3ZS58_RAT	NADH dehydrogenase [ubiquinone] 1 alpha subcomplex subunit 2 OS=Rattus norvegicus GN=Ndufa2 PE=3 SV=1	2	1.33045	0.283579
722	4.24	4.24	5.468	2.773	2.377	tr|D3ZML0|D3ZML0_RAT	Tripeptidyl peptidase II, isoform CRA_a OS=Rattus norvegicus GN=Tpp2 PE=4 SV=1	3	1.04713	0.641863
723	4.23	4.23	6.113	2.636	1.514	tr|F1LM13|F1LM13_RAT	Protein Ank3 (Fragment) OS=Rattus norvegicus GN=Ank3 PE=4 SV=1	2	2.07014	0.0875065
724	4.22	4.22	14.67	6.933	6.933	tr|Q5XIH1|Q5XIH1_RAT	Asporin OS=Rattus norvegicus GN=Aspn PE=2 SV=1	3	0.963829	0.92507
725	4.21	4.44	7.723	5.593	3.462	tr|Q498N2|Q498N2_RAT	Amine oxidase OS=Rattus norvegicus GN=Abp1 PE=2 SV=1	2	0.954993	0.907008
726	4.21	4.21	16.44	10.36	5.856	tr|Q4KLL7|Q4KLL7_RAT	Protein Vps4b OS=Rattus norvegicus GN=Vps4b PE=2 SV=1	3	0.990832	0.839529
727	4.21	4.21	5.597	2.64	2.006	tr|D3ZJF2|D3ZJF2_RAT	Reticulon-3 OS=Rattus norvegicus GN=Rtn3 PE=4 SV=1	2	0.887156	0.818629
728	4.2	4.75	24.5	18.5	18.5	tr|Q5M860|Q5M860_RAT	Protein Arhgdib OS=Rattus norvegicus GN=Arhgdib PE=2 SV=1	3	1.03753	0.781928
729	4.2	4.22	9.479	6.161	4.502	sp|Q9ET64|NSMA_RAT	Sphingomyelin phosphodiesterase 2 OS=Rattus norvegicus GN=Smpd2 PE=1 SV=1	2	0.666807	0.241886
730	4.2	4.2	32.66	12.5	8.468	tr|D4A9L2|D4A9L2_RAT	Protein Sfrs1 OS=Rattus norvegicus GN=Srsf1 PE=4 SV=1	2	1.00925	0.746216
731	4.2	4.2	9.044	7.167	3.754	tr|F1MAA5|F1MAA5_RAT	Protein Rangap1 OS=Rattus norvegicus GN=Rangap1 PE=4 SV=1	2	1.31826	0.59436
732	4.19	4.19	4.945	3.709	1.923	tr|G3V7G8|G3V7G8_RAT	Glycine--tRNA ligase OS=Rattus norvegicus GN=Gars PE=4 SV=1	2	1.01859	0.954386
733	4.18	8.74	23.37	18.07	11.33	sp|Q794E4|HNRPF_RAT	Heterogeneous nuclear ribonucleoprotein F OS=Rattus norvegicus GN=Hnrnpf PE=1 SV=3	4	1.07647	0.663756
734	4.18	4.28	8.022	4.505	2.527	tr|D4A077|D4A077_RAT	Protein Ush1c OS=Rattus norvegicus GN=Ush1c PE=4 SV=1	3	0.981748	0.908736
735	4.18	4.18	10.21	10.21	7.66	sp|Q5I0E7|TMED9_RAT	Transmembrane emp24 domain-containing protein 9 OS=Rattus norvegicus GN=Tmed9 PE=1 SV=1	2
736	4.16	4.2	14.69	7.133	3.916	tr|F1LXP4|F1LXP4_RAT	Interleukin enhancer-binding factor 3 (Fragment) OS=Rattus norvegicus GN=Ilf3 PE=4 SV=1	2	0.847227	0.485225
737	4.15	6.46	5.461	0.9699	0.5482	sp|Q7TMA5|APOB_RAT	Apolipoprotein B-100 OS=Rattus norvegicus GN=Apob PE=1 SV=1	3	0.765597	0.490913
738	4.15	4.15	14.77	11.81	11.81	tr|D4AB04|D4AB04_RAT	Proteasome subunit alpha type OS=Rattus norvegicus PE=3 SV=1	4	0.981748	0.954638
739	4.12	4.42	10.88	5.367	4.661	tr|D3Z8E0|D3Z8E0_RAT	Protein Rps6ka3 OS=Rattus norvegicus GN=Rps6ka3 PE=4 SV=1	3	1.99526	0.323454
740	4.11	4.18	8.026	4.772	3.579	tr|D3ZUE2|D3ZUE2_RAT	Coronin OS=Rattus norvegicus GN=Coro7 PE=3 SV=1	3	1.1695	0.667809
741	4.11	4.11	16.61	7.021	3.425	tr|D3ZJH9|D3ZJH9_RAT	Malic enzyme OS=Rattus norvegicus GN=Me2 PE=3 SV=1	2	0.862979	0.537261
742	4.11	4.11	11.26	10.36	7.658	tr|B2RZB5|B2RZB5_RAT	Chromatin modifying protein 2A OS=Rattus norvegicus GN=Chmp2a PE=2 SV=1	2	1.1695	0.522471
743	4.1	4.19	4.903	2.59	1.295	tr|D3ZTL0|D3ZTL0_RAT	Protein Tcerg1 OS=Rattus norvegicus GN=Tcerg1 PE=4 SV=1	2	1.18032	0.445273
744	4.09	7.72	5.386	0.9793	0.4761	tr|D4A9J5|D4A9J5_RAT	Uncharacterized protein OS=Rattus norvegicus PE=4 SV=1	3	0.946237	0.64437
745	4.09	4.19	12.86	4.33	4.33	sp|Q5XIN6|LETM1_RAT	LETM1 and EF-hand domain-containing protein 1, mitochondrial OS=Rattus norvegicus GN=Letm1 PE=1 SV=1	2	1.01859	0.921034
746	4.09	4.09	14.77	5.516	4.448	tr|Q499Q4|Q499Q4_RAT	Phosphoglucomutase 1 OS=Rattus norvegicus GN=Pgm1 PE=2 SV=2	3	0.954993	0.66419
747	4.07	4.1	5.583	2.299	1.423	tr|D4A996|D4A996_RAT	Protein Kif13b OS=Rattus norvegicus GN=Kif13b PE=3 SV=1	2	1.01859	0.729116
748	4.07	4.08	20.89	20.89	20.89	sp|P41498|PPAC_RAT	Low molecular weight phosphotyrosine protein phosphatase OS=Rattus norvegicus GN=Acp1 PE=1 SV=3	3	1.00925	0.867086
749	4.07	4.07	8.606	3.159	2.397	sp|P05708|HXK1_RAT	Hexokinase-1 OS=Rattus norvegicus GN=Hk1 PE=1 SV=4	2	1.00925	0.956443
750	4.07	4.07	20.92	16.99	10.46	tr|B0BNB8|B0BNB8_RAT	Calml4 protein OS=Rattus norvegicus GN=Calml4 PE=2 SV=1	2	1.21339	0.448873
751	4.06	4.16	4.207	1.953	1.578	sp|Q6T3U3|NPCL1_RAT	Niemann-Pick C1-like protein 1 OS=Rattus norvegicus GN=Npc1l1 PE=1 SV=1	2	0.879022	0.804434
752	4.06	4.06	10.9	2.215	2.215	tr|D3ZJQ9|D3ZJQ9_RAT	Uncharacterized protein OS=Rattus norvegicus PE=4 SV=1	2	0.831764	0.73222
753	4.06	4.06	12.41	6.022	6.022	sp|Q6AYK8|EIF3D_RAT	Eukaryotic translation initiation factor 3 subunit D OS=Rattus norvegicus GN=Eif3d PE=2 SV=1	3	0.879022	0.535221
754	4.06	4.06	16.76	8.108	5.676	sp|Q6DGG0|PPID_RAT	Peptidyl-prolyl cis-trans isomerase D OS=Rattus norvegicus GN=Ppid PE=1 SV=3	2	1.02802	0.795256
755	4.05	4.84	8.771	1.61	0.7203	tr|F1MA98|F1MA98_RAT	Protein Tpr OS=Rattus norvegicus GN=Tpr PE=4 SV=1	2	1.1695	0.129164
756	4.05	4.29	22.07	16.22	9.91	sp|P14942|GSTA4_RAT	Glutathione S-transferase alpha-4 OS=Rattus norvegicus GN=Gsta4 PE=1 SV=2	2	0.744732	0.478335
757	4.05	4.13	3.787	1.169	0.7013	tr|F1LNJ2|F1LNJ2_RAT	Protein Ascc3l1 OS=Rattus norvegicus GN=Ascc3l1 PE=4 SV=1	2	0.887156	0.517729
758	4.04	8.89	25	15.87	9.615	sp|P05545|SPA3K_RAT	Serine protease inhibitor A3K OS=Rattus norvegicus GN=Serpina3k PE=1 SV=3	5	1.21339	0.783151
759	4.04	4.1	13.18	7.727	7.727	sp|P62193|PRS4_RAT	26S protease regulatory subunit 4 OS=Rattus norvegicus GN=Psmc1 PE=2 SV=1	3	1.05682	0.897378
760	4.04	4.06	5.153	2.157	2.157	tr|F1MA59|F1MA59_RAT	Protein Col4a1 OS=Rattus norvegicus GN=Col4a1 PE=4 SV=1	4	0.903649	0.697629
761	4.04	4.04	20.22	10.11	7.581	sp|P55213|CASP3_RAT	Caspase-3 OS=Rattus norvegicus GN=Casp3 PE=2 SV=2	2	0.862979	0.635086
762	4.04	4.04	4.606	3.454	2.657	tr|D3ZF89|D3ZF89_RAT	Protein Ubap2 OS=Rattus norvegicus GN=Ubap2 PE=4 SV=1	2	1.05682	0.894182
763	4.04	4.04	11.81	5.333	5.333	sp|Q4KLN7|ARFG3_RAT	ADP-ribosylation factor GTPase-activating protein 3 OS=Rattus norvegicus GN=Arfgap3 PE=2 SV=1	2	0.928966	0.580688
764	4.04	4.04	16.54	10.38	10.38	sp|Q9QXU9|PCSK1_RAT	ProSAAS OS=Rattus norvegicus GN=Pcsk1n PE=1 SV=1	2	0.717794	0.215706
765	4.04	4.04	41.9	27.62	20.95	sp|P11232|THIO_RAT	Thioredoxin OS=Rattus norvegicus GN=Txn PE=1 SV=2	5	1.09648	0.712049
766	4.03	4.2	19.9	13.09	13.09	tr|F8WFW0|F8WFW0_RAT	Protein LOC685320 (Fragment) OS=Rattus norvegicus GN=Rpl12 PE=3 SV=1	2	0.903649	0.722009
767	4.03	4.08	12.66	9.181	5.707	tr|Q5EBD0|Q5EBD0_RAT	SEC14-like 2 (S. cerevisiae) OS=Rattus norvegicus GN=Sec14l2 PE=2 SV=1	2	0.887156	0.632912
768	4.03	4.03	10.46	4.61	3.014	sp|Q9WV25|PUF60_RAT	Poly(U)-binding-splicing factor PUF60 OS=Rattus norvegicus GN=Puf60 PE=2 SV=2	2	1.04713	0.910542
769	4.03	4.03	8.252	4.196	2.657	tr|D3ZSY4|D3ZSY4_RAT	Eosinophil peroxidase (Predicted) OS=Rattus norvegicus GN=Epx PE=4 SV=1	2	0.831764	0.679308
770	4.03	4.03	9.735	7.522	4.425	sp|P40241|CD9_RAT	CD9 antigen OS=Rattus norvegicus GN=Cd9 PE=1 SV=2	2	0.954993	0.878949
771	4.03	4.03	11.07	11.07	8.214	sp|P10247|HG2A_RAT	H-2 class II histocompatibility antigen gamma chain OS=Rattus norvegicus GN=Cd74 PE=2 SV=2	2	0.912011	0.802065
772	4.03	4.03	39.8	34.69	34.69	sp|P01041|CYTB_RAT	Cystatin-B OS=Rattus norvegicus GN=Cstb PE=1 SV=1	3	1.57036	0.240134
773	4.02	4.03	23.55	10.09	7.951	sp|P22509|FBRL_RAT	rRNA 2'-O-methyltransferase fibrillarin OS=Rattus norvegicus GN=Fbl PE=1 SV=2	2	0.972747	0.838392
774	4.02	4.02	12.77	6.383	6.383	sp|Q6AXT0|RM37_RAT	39S ribosomal protein L37, mitochondrial OS=Rattus norvegicus GN=Mrpl37 PE=2 SV=1	2	0.794328	0.422829
775	4.01	6.02	44.51	26.22	21.34	tr|Q0ZFS8|Q0ZFS8_RAT	Protein Sfrs3 OS=Rattus norvegicus GN=Srsf3 PE=2 SV=1	7	1.24738	0.657978
776	4.01	6.01	19.37	4.64	2.892	tr|F1LN37|F1LN37_RAT	Collagen alpha-1(II) chain OS=Rattus norvegicus GN=Col2a1 PE=4 SV=1	7	0.49204	0.322979
777	4.01	4.51	9.503	7.559	5.184	tr|G3V8T5|G3V8T5_RAT	Protein Ruvbl2 OS=Rattus norvegicus GN=Ruvbl2 PE=4 SV=1	2	0.972747	0.956046
778	4.01	4.01	23.48	23.48	23.48	sp|P28902|GUC2A_RAT	Guanylin OS=Rattus norvegicus GN=Guca2a PE=1 SV=1	4	1.5417	0.436514
779	4	28.47	47.75	44.37	42.34	sp|P69897|TBB5_RAT	Tubulin beta-5 chain OS=Rattus norvegicus GN=Tubb5 PE=1 SV=1	29	0.847227	0.776682
780	4	21.74	22.12	19.12	16.43	sp|P14659|HSP72_RAT	Heat shock-related 70 kDa protein 2 OS=Rattus norvegicus GN=Hspa2 PE=2 SV=2	15	1.02802	0.981356
781	4	20.11	39.46	39.46	39.46	sp|P11517|HBB2_RAT	Hemoglobin subunit beta-2 OS=Rattus norvegicus PE=1 SV=2	21	1.83654	0.668101
782	4	14.38	26.8	17	13.46	tr|F1LX65|F1LX65_RAT	Protein LOC686567 (Fragment) OS=Rattus norvegicus GN=LOC686567 PE=4 SV=1	8	0.954993	0.942731
783	4	5.29	11.63	8.638	8.638	sp|Q4KLL0|TCEA1_RAT	Transcription elongation factor A protein 1 OS=Rattus norvegicus GN=Tcea1 PE=2 SV=1	3	0.954993	0.93614
784	4	5.07	11.59	10.06	10.06	tr|Q0R3X4|Q0R3X4_RAT	GIMAP4 OS=Rattus norvegicus GN=Gimap4 PE=2 SV=1	3	0.648634	0.475134
785	4	4.63	13.63	9.976	5.839	sp|Q6AYC2|IRGM_RAT	Immunity-related GTPase family M protein OS=Rattus norvegicus GN=Irgm PE=2 SV=1	2	0.831764	0.619271
786	4	4.52	17.95	7.407	5.413	tr|D3ZAP9|D3ZAP9_RAT	Protein Gpd1l OS=Rattus norvegicus GN=Gpd1l PE=3 SV=1	2	0.912011	0.66103
787	4	4.51	6.754	5.664	4.575	tr|D3Z9Y9|D3Z9Y9_RAT	Dipeptidyl peptidase 1 OS=Rattus norvegicus GN=Ctsc PE=3 SV=1	2	1.20226	0.616318
788	4	4.44	8.146	3.658	1.746	tr|E9PTX9|E9PTX9_RAT	Protein Slc12a2 OS=Rattus norvegicus GN=Slc12a2 PE=4 SV=1	2	0.879022	0.634896
789	4	4.27	6.147	2.854	2.854	sp|B5DFC8|EIF3C_RAT	Eukaryotic translation initiation factor 3 subunit C OS=Rattus norvegicus GN=Eif3c PE=2 SV=1	3	0.92045	0.44663
790	4	4.25	11.17	7.357	5.995	sp|P19836|PCY1A_RAT	Choline-phosphate cytidylyltransferase A OS=Rattus norvegicus GN=Pcyt1a PE=1 SV=2	2	1.28233	0.625231
791	4	4.1	4.255	2.688	2.016	tr|F1M8K0|F1M8K0_RAT	Protein Dag1 OS=Rattus norvegicus GN=Dag1 PE=4 SV=1	2	1.11686	0.785751
792	4	4.1	21.48	17.78	14.07	tr|D3ZKG6|D3ZKG6_RAT	Protein RGD1559955 OS=Rattus norvegicus GN=RGD1559955 PE=3 SV=1	2	1.00925	0.734311
793	4	4.09	20	10.23	10.23	sp|Q4KM74|SC22B_RAT	Vesicle-trafficking protein SEC22b OS=Rattus norvegicus GN=Sec22b PE=1 SV=3	3	0.758578	0.532918
794	4	4.09	21.21	21.21	15.91	tr|Q5XFV4|Q5XFV4_RAT	Fabp4 protein OS=Rattus norvegicus GN=Fabp4 PE=2 SV=1	2	0.879022	0.835125
795	4	4.08	12.5	9.028	9.028	tr|D3ZAK6|D3ZAK6_RAT	Protein LOC100360484 OS=Rattus norvegicus GN=LOC100360484 PE=3 SV=1	3	0.879022	0.777048
796	4	4.05	11.69	10.71	10.71	tr|F1M1H0|F1M1H0_RAT	Protein Dera (Fragment) OS=Rattus norvegicus GN=Dera PE=4 SV=1	2	0.758578	0.458484
797	4	4.04	27.08	17.71	17.71	tr|D3ZEP6|D3ZEP6_RAT	Uncharacterized protein OS=Rattus norvegicus PE=4 SV=1	2	1.36773	0.693221
798	4	4.03	23.84	15.23	15.23	tr|Q6PDV6|Q6PDV6_RAT	40S ribosomal protein S14 OS=Rattus norvegicus GN=Rps14 PE=2 SV=1	2	0.855067	0.571374
799	4	4.02	29.01	13.58	13.58	sp|P97541|HSPB6_RAT	Heat shock protein beta-6 OS=Rattus norvegicus GN=Hspb6 PE=1 SV=1	2	1.09648	0.498682
800	4	4.02	4.688	3.819	3.819	tr|Q66HL0|Q66HL0_RAT	5' nucleotidase, ecto OS=Rattus norvegicus GN=Nt5e PE=2 SV=2	2	1.43219	0.492691
801	4	4	18.47	10.83	10.83	sp|Q66HS7-2|PDLI3_RAT	Isoform 2 of PDZ and LIM domain protein 3 OS=Rattus norvegicus GN=Pdlim3	2	0.972747	0.963194
802	4	4	12.06	6.349	6.349	tr|F1M7R8|F1M7R8_RAT	Small glutamine-rich tetratricopeptide repeat-containing protein alpha OS=Rattus norvegicus GN=Sgta PE=4 SV=1	2	1.11686	0.63611
803	4	4	11.78	6.897	6.897	tr|F1LQX0|F1LQX0_RAT	Uncharacterized protein (Fragment) OS=Rattus norvegicus PE=4 SV=1	2	0.954993	0.962399
804	4	4	13.14	10.58	7.664	sp|P20788|UCRI_RAT	Cytochrome b-c1 complex subunit Rieske, mitochondrial OS=Rattus norvegicus GN=Uqcrfs1 PE=1 SV=2	3	1.02802	0.725566
805	4	4	15.93	6.195	6.195	tr|Q6IN22|Q6IN22_RAT	Cathepsin B OS=Rattus norvegicus GN=Ctsb PE=2 SV=1	2	0.570164	0.391122
806	4	4	13.68	9.474	9.474	tr|F1LPX9|F1LPX9_RAT	Glutathione peroxidase OS=Rattus norvegicus GN=Gpx2 PE=3 SV=1	2	1.05682	0.96505
807	4	4	7.987	6.709	6.709	tr|E9PT30|E9PT30_RAT	Protein Itln1 OS=Rattus norvegicus GN=Itln1 PE=4 SV=1	2	0.420727	0.193371
808	4	4	16.52	8.482	8.482	tr|D4ADX5|D4ADX5_RAT	Protein Ndufs7 OS=Rattus norvegicus GN=Ndufs7 PE=3 SV=1	2	0.816582	0.560354
809	4	4	5.19	4.192	4.192	tr|D3ZU02|D3ZU02_RAT	Phosphoglucomutase 3 (Predicted), isoform CRA_d OS=Rattus norvegicus GN=Pgm3 PE=3 SV=1	2	0.831764	0.486338
810	4	4	6.908	5.592	5.592	tr|D3ZL77|D3ZL77_RAT	Uncharacterized protein OS=Rattus norvegicus PE=4 SV=1	2	0.895365	0.836675
811	4	4	39.78	26.88	26.88	tr|B2RZ27|B2RZ27_RAT	Protein Sh3bgrl3 OS=Rattus norvegicus GN=Sh3bgrl3 PE=4 SV=1	3	1.21339	0.539993
812	4	4	9.314	4.412	4.412	tr|B0BN81|B0BN81_RAT	Ribosomal protein S5, isoform CRA_b OS=Rattus norvegicus GN=Rps5 PE=2 SV=1	3	0.704693	0.496449
813	4	4	16.44	9.132	9.132	sp|Q63584|TMEDA_RAT	Transmembrane emp24 domain-containing protein 10 OS=Rattus norvegicus GN=Tmed10 PE=1 SV=2	2	0.928966	0.836987
814	4	4	37.97	27.85	27.85	sp|P02634|S100G_RAT	Protein S100-G OS=Rattus norvegicus GN=S100g PE=1 SV=3	2	0.255859	0.162248
815	4	4	12.78	12.78	8.811	tr|Q8SEZ5|Q8SEZ5_RAT	Cytochrome c oxidase subunit 2 OS=Rattus norvegicus GN=Mt-co2 PE=3 SV=1	2	0.398107	0.422684
816	4	4	13.4	10.65	10.65	tr|G3V8D5|G3V8D5_RAT	6-phosphogluconolactonase OS=Rattus norvegicus GN=Pgls PE=4 SV=1	2	0.903649	0.763659
817	4	4	4.131	3.442	3.442	tr|F1LT49|F1LT49_RAT	Protein Lrrc47 (Fragment) OS=Rattus norvegicus GN=Lrrc47 PE=4 SV=1	2	1.36773	0.54697
818	4	4	12.12	9.848	9.848	tr|D3ZG43|D3ZG43_RAT	NADH dehydrogenase (Ubiquinone) Fe-S protein 3 (Predicted), isoform CRA_c OS=Rattus norvegicus GN=Ndufs3 PE=3 SV=1	2	0.92045	0.71176
819	4	4	5.838	4.569	4.569	sp|Q6P7S1|ASAH1_RAT	Acid ceramidase OS=Rattus norvegicus GN=Asah1 PE=2 SV=1	2	0.990832	0.965306
820	4	4	8.287	6.354	6.354	sp|Q5KTC7|NAAA_RAT	N-acylethanolamine-hydrolyzing acid amidase OS=Rattus norvegicus GN=Naaa PE=1 SV=1	2	0.654636	0.502263
821	4	4	21.09	14.84	14.84	sp|P55770|NH2L1_RAT	NHP2-like protein 1 OS=Rattus norvegicus GN=Nhp2l1 PE=2 SV=4	2	0.903649	0.836857
822	4	4	16.42	14.43	14.43	sp|P04041|GPX1_RAT	Glutathione peroxidase 1 OS=Rattus norvegicus GN=Gpx1 PE=1 SV=4	2	1.0666	0.766224
823	4	4	9.948	9.948	9.948	tr|Q32PX6|Q32PX6_RAT	Protein Rhog OS=Rattus norvegicus GN=Rhog PE=2 SV=1	2	1.02802	0.873678
824	4	4	9.524	9.524	9.524	tr|F8WG73|F8WG73_RAT	Basigin OS=Rattus norvegicus GN=Bsg PE=4 SV=1	3	0.887156	0.584137
825	4	4	4.972	4.972	4.972	tr|F1LRT1|F1LRT1_RAT	Fructose-1,6-bisphosphatase class 1 OS=Rattus norvegicus GN=Fbp1 PE=3 SV=1	3	1.20226	0.631267
826	4	4	19.33	19.33	19.33	tr|D3ZZK1|D3ZZK1_RAT	Protein LOC100359563 OS=Rattus norvegicus GN=LOC100359563 PE=4 SV=1	3	0.946237	0.685491
827	4	4	13.73	13.73	13.73	tr|D3ZIJ8|D3ZIJ8_RAT	Protein LOC100363620 OS=Rattus norvegicus GN=LOC100363620 PE=4 SV=1	2	1.35519	0.568685
828	4	4	6.545	6.545	6.545	tr|D3ZCA0|D3ZCA0_RAT	Proline synthetase co-transcribed (Predicted) OS=Rattus norvegicus GN=Prosc PE=3 SV=1	2	0.879022	0.808055
829	4	4	18.37	18.37	18.37	sp|Q9WU49|CHSP1_RAT	Calcium-regulated heat stable protein 1 OS=Rattus norvegicus GN=Carhsp1 PE=1 SV=1	2	1.07647	0.657524
830	4	4	10.64	10.64	10.64	sp|Q561R0|PERP1_RAT	Plasma cell-induced resident endoplasmic reticulum protein OS=Rattus norvegicus GN=Pacap PE=2 SV=1	3	1.00925	0.852899
831	4	4	22.11	22.11	22.11	sp|P62076|TIM13_RAT	Mitochondrial import inner membrane translocase subunit Tim13 OS=Rattus norvegicus GN=Timm13 PE=2 SV=1	2	1.13763	0.79019
832	4	4	23.86	23.86	23.86	sp|P19939|APOC1_RAT	Apolipoprotein C-I OS=Rattus norvegicus GN=Apoc1 PE=2 SV=1	2	1.51356	0.476703
833	4	4	9.132	9.132	9.132	sp|P15865|H14_RAT	Histone H1.4 OS=Rattus norvegicus GN=Hist1h1e PE=1 SV=3	2	1.28233	0.330744
834	4	4	14.18	14.18	14.18	sp|P06768|RET2_RAT	Retinol-binding protein 2 OS=Rattus norvegicus GN=Rbp2 PE=1 SV=3	2	1.11686	0.867337
835	3.94	4.24	9.647	6.588	4.941	sp|Q71UF4|RBBP7_RAT	Histone-binding protein RBBP7 OS=Rattus norvegicus GN=Rbbp7 PE=2 SV=1	2	1.07647	0.758605
836	3.94	3.94	12.89	10.31	7.99	tr|D3ZYJ4|D3ZYJ4_RAT	Sec1 family domain-containing protein 1 OS=Rattus norvegicus GN=Scfd1 PE=4 SV=1	2	0.981748	0.99516
837	3.92	4.51	12.14	8.01	6.718	tr|F1LRB8|F1LRB8_RAT	Protein LOC100363915 OS=Rattus norvegicus GN=LOC100363915 PE=3 SV=1	2	1.25892	0.653117
838	3.92	3.92	6.71	3.764	3.764	tr|G3V9V0|G3V9V0_RAT	Thioredoxin reductase 1, cytoplasmic OS=Rattus norvegicus GN=Txnrd1 PE=3 SV=1	2	0.972747	0.956493
839	3.91	3.91	11.8	8.26	3.245	sp|P00388|NCPR_RAT	NADPH--cytochrome P450 reductase OS=Rattus norvegicus GN=Por PE=1 SV=3	2	0.963829	0.881879
840	3.9	6.1	30.47	24.22	24.22	tr|D4AEC0|D4AEC0_RAT	Histone H2A OS=Rattus norvegicus GN=LOC685909 PE=3 SV=1	6	0.912011	0.766919
841	3.9	3.9	7.611	5.855	3.864	tr|D4A4V0|D4A4V0_RAT	Coatomer subunit gamma OS=Rattus norvegicus GN=Copg1 PE=3 SV=1	2	0.903649	0.859242
842	3.89	3.89	15.08	5.987	5.987	tr|B2RZ74|B2RZ74_RAT	Protein Snrnp70 OS=Rattus norvegicus GN=Snrnp70 PE=2 SV=1	3	1.22462	0.649653
843	3.88	6.18	11.39	6.834	6.834	tr|D4A6C5|D4A6C5_RAT	Protein Arhgap1 OS=Rattus norvegicus GN=Arhgap1 PE=4 SV=1	5	0.630957	0.452298
844	3.87	6.41	15.81	12.03	10.02	tr|Q6AY21|Q6AY21_RAT	GTPase activating protein (SH3 domain) binding protein 2 OS=Rattus norvegicus GN=G3bp2 PE=2 SV=1	4	0.847227	0.677976
845	3.87	3.87	14.42	12.02	9.135	sp|P36201|CRIP2_RAT	Cysteine-rich protein 2 OS=Rattus norvegicus GN=Crip2 PE=2 SV=1	2	1.04713	0.800621
846	3.86	3.89	9.728	7.393	7.393	sp|E9PU28|IMDH2_RAT	Inosine-5'-monophosphate dehydrogenase 2 OS=Rattus norvegicus GN=Impdh2 PE=3 SV=1	3	0.758578	0.515424
847	3.86	3.86	16.89	9.333	9.333	tr|B5DEQ4|B5DEQ4_RAT	Protein Snrpb2 OS=Rattus norvegicus GN=Snrpb2 PE=2 SV=1	2	0.870964	0.751649
848	3.85	3.91	4.913	3.372	2.023	tr|D4AE96|D4AE96_RAT	Importin 7 (Predicted), isoform CRA_c OS=Rattus norvegicus GN=Ipo7 PE=4 SV=1	2	1.03753	0.827012
849	3.85	3.85	6.689	4.348	4.348	tr|D3ZUA1|D3ZUA1_RAT	Torsin-1A-interacting protein 1 OS=Rattus norvegicus GN=Tor1aip1 PE=4 SV=1	2	0.809096	0.706362
850	3.83	3.83	5.107	1.309	1.309	tr|D4A3E3|D4A3E3_RAT	Protein Arid1a OS=Rattus norvegicus GN=Arid1a PE=4 SV=1	2	0.981748	0.829497
851	3.83	3.83	11.91	6.925	6.925	sp|Q91ZS3|CAB45_RAT	45 kDa calcium-binding protein OS=Rattus norvegicus GN=Sdf4 PE=1 SV=1	3	1.15878	0.345419
852	3.82	6.52	7.66	7.66	7.66	tr|D3ZD73|D3ZD73_RAT	Protein RGD1564560 OS=Rattus norvegicus GN=Ddx6 PE=3 SV=1	4	0.724436	0.442383
853	3.82	3.85	7.339	7.339	7.339	tr|F1LNY0|F1LNY0_RAT	Hypoxanthine-guanine phosphoribosyltransferase OS=Rattus norvegicus GN=Hprt1 PE=4 SV=1	2	0.870964	0.798654
854	3.82	3.82	25	18.1	18.1	tr|D3ZCZ9|D3ZCZ9_RAT	Protein LOC679739 OS=Rattus norvegicus GN=LOC679739 PE=4 SV=1	2	1.20226	0.538538
855	3.82	3.82	15.85	11.79	11.79	sp|P00762|TRY1_RAT	Anionic trypsin-1 OS=Rattus norvegicus GN=Prss1 PE=1 SV=1	3	1.44544	0.520265
856	3.82	3.82	21.57	14.71	14.71	tr|Q7TPJ6|Q7TPJ6_RAT	Ac2-246 OS=Rattus norvegicus GN=Phf5a PE=2 SV=1	2	1.02802	0.902016
857	3.8	3.84	9.091	7.67	5.966	tr|Q6AXW2|Q6AXW2_RAT	Protein Tmod3 OS=Rattus norvegicus GN=Tmod3 PE=2 SV=1	2	1.10662	0.583257
858	3.77	3.86	11.55	8.581	6.931	sp|Q5U2U2|CRKL_RAT	Crk-like protein OS=Rattus norvegicus GN=Crkl PE=1 SV=1	2	1.13763	0.478883
859	3.75	3.81	8.333	3.295	2.326	tr|Q6XLI7|Q6XLI7_RAT	Protein Rbm12 OS=Rattus norvegicus GN=Rbm12 PE=2 SV=1	3	1.04713	0.777654
860	3.75	3.75	17.69	10.77	7.308	sp|P27139|CAH2_RAT	Carbonic anhydrase 2 OS=Rattus norvegicus GN=Ca2 PE=1 SV=2	2	1.00925	0.93712
861	3.75	3.75	12.54	9.319	9.319	tr|G8JLR7|G8JLR7_RAT	Palmitoyl-protein thioesterase 1 (Fragment) OS=Rattus norvegicus GN=Ppt1 PE=4 SV=1	2	0.672977	0.390692
862	3.74	3.75	10.67	9	6.667	sp|Q9JHY1|JAM1_RAT	Junctional adhesion molecule A OS=Rattus norvegicus GN=F11r PE=1 SV=1	2	0.895365	0.403752
863	3.73	3.75	12.32	4.8	3.84	tr|D3ZV82|D3ZV82_RAT	Protein LOC685067 OS=Rattus norvegicus GN=LOC685067 PE=4 SV=1	2	1.02802	0.721343
864	3.72	3.77	4.836	1.46	1.46	tr|D4AA25|D4AA25_RAT	Adaptor-related protein complex 3, beta 1 subunit (Predicted), isoform CRA_a OS=Rattus norvegicus GN=Ap3b1 PE=4 SV=1	2	1.24738	0.973394
865	3.72	3.74	24.08	10.87	8.35	sp|P05370|G6PD_RAT	Glucose-6-phosphate 1-dehydrogenase OS=Rattus norvegicus GN=G6pdx PE=1 SV=3	4	1	0.914054
866	3.72	3.72	11.02	5.249	5.249	sp|P09456|KAP0_RAT	cAMP-dependent protein kinase type I-alpha regulatory subunit OS=Rattus norvegicus GN=Prkar1a PE=2 SV=2	2	1.09648	0.622842
867	3.71	3.74	10.49	4.22	2.174	tr|D4A3S8|D4A3S8_RAT	NOL1/NOP2/Sun domain family, member 2 (Predicted) OS=Rattus norvegicus GN=Nsun2 PE=4 SV=1	2	1.1272	0.264865
868	3.7	3.71	6.445	2.246	2.246	tr|D4A370|D4A370_RAT	Protein RGD1561149 OS=Rattus norvegicus GN=RGD1561149 PE=4 SV=1	2	1.10662	0.805708
869	3.7	3.7	17.17	8.081	8.081	sp|Q499N6|UBXN1_RAT	UBX domain-containing protein 1 OS=Rattus norvegicus GN=Ubxn1 PE=2 SV=2	2	1.87068	0.440837
870	3.69	4.77	5.222	1.965	1.46	tr|D4A301|D4A301_RAT	Protein Col14a1 OS=Rattus norvegicus GN=Col14a1 PE=4 SV=1	3	0.758578	0.145893
871	3.69	3.69	6.612	3.623	2.989	tr|F1LZ87|F1LZ87_RAT	Protein Dsg2 (Fragment) OS=Rattus norvegicus GN=Dsg2 PE=3 SV=1	2	0.758578	0.40238
872	3.69	3.69	17.86	12.05	7.589	tr|D4A9Z8|D4A9Z8_RAT	Protein Chmp4bl1 OS=Rattus norvegicus GN=Chmp4bl1 PE=4 SV=1	2	1	0.504886
873	3.68	3.68	5.676	4.007	4.007	sp|Q6UPE0|CHDH_RAT	Choline dehydrogenase, mitochondrial OS=Rattus norvegicus GN=Chdh PE=1 SV=1	2	1.23595	0.442182
874	3.66	4.03	6.404	2.632	1.404	tr|G3V8T4|G3V8T4_RAT	DNA damage-binding protein 1 OS=Rattus norvegicus GN=Ddb1 PE=4 SV=1	2	0.787046	0.176511
875	3.65	3.65	12.09	5.782	2.365	tr|G3V679|G3V679_RAT	Transferrin receptor protein 1 OS=Rattus norvegicus GN=Tfrc PE=4 SV=1	2	0.92045	0.424975
876	3.64	3.64	5.556	5.556	5.556	tr|F1LQJ7|F1LQJ7_RAT	Protein Pck2 (Fragment) OS=Rattus norvegicus GN=Pck2 PE=3 SV=1	3	0.912011	0.801302
877	3.64	3.64	7.817	5.121	5.121	tr|F1LQ36|F1LQ36_RAT	Protein Tial1 OS=Rattus norvegicus GN=Tial1 PE=4 SV=1	2	0.862979	0.744773
878	3.63	3.68	12.66	6.846	6.432	tr|B2GV15|B2GV15_RAT	Dihydrolipoamide branched chain transacylase E2 OS=Rattus norvegicus GN=Dbt PE=2 SV=1	3	0.847227	0.143845
879	3.62	5.44	12.17	8.012	8.012	sp|Q9JLZ1|GLRX3_RAT	Glutaredoxin-3 OS=Rattus norvegicus GN=Glrx3 PE=1 SV=2	3	1	0.932567
880	3.62	3.63	3.99	3.386	2.418	tr|F1M4J1|F1M4J1_RAT	Protein LOC100294508 (Fragment) OS=Rattus norvegicus GN=LOC100294508 PE=4 SV=1	2	1.24738	0.476493
881	3.61	3.65	9.165	4.888	3.87	tr|G8JLR4|G8JLR4_RAT	Nicotinamide phosphoribosyltransferase OS=Rattus norvegicus GN=Nampt PE=4 SV=1	2	0.666807	0.497208
882	3.61	3.63	7.346	3.84	3.84	tr|D3ZD23|D3ZD23_RAT	ATP-binding cassette, sub-family E (OABP), member 1 OS=Rattus norvegicus GN=Abce1 PE=3 SV=1	2	0.809096	0.432085
883	3.6	3.73	13.75	10.22	5.894	sp|Q6P6R2|DLDH_RAT	Dihydrolipoyl dehydrogenase, mitochondrial OS=Rattus norvegicus GN=Dld PE=1 SV=1	2	0.597035	0.313668
884	3.6	3.61	6.849	4.658	3.014	tr|D3ZTT7|D3ZTT7_RAT	Protein Unc84b OS=Rattus norvegicus GN=Unc84b PE=4 SV=1	2	0.794328	0.494119
885	3.6	3.6	12.62	8.252	8.252	tr|B5DF65|B5DF65_RAT	Biliverdin reductase B (Flavin reductase (NADPH)) OS=Rattus norvegicus GN=Blvrb PE=2 SV=1	2	1.1272	0.797301
886	3.59	3.59	12.34	12.34	12.34	sp|B0BN18|PFD2_RAT	Prefoldin subunit 2 OS=Rattus norvegicus GN=Pfdn2 PE=2 SV=1	2	1.22462	0.6442
887	3.58	5.13	6.531	1.609	1.609	tr|F1M885|F1M885_RAT	Protein Myo7b (Fragment) OS=Rattus norvegicus GN=Myo7b PE=4 SV=1	4	0.990832	0.941384
888	3.58	3.59	5.672	5.075	3.284	tr|D3ZIC6|D3ZIC6_RAT	Mucin and cadherin like, isoform CRA_c OS=Rattus norvegicus GN=Cdhr5 PE=4 SV=1	2	1.13763	0.590424
889	3.57	3.58	9.552	4.678	4.678	sp|Q63184|E2AK2_RAT	Interferon-induced, double-stranded RNA-activated protein kinase OS=Rattus norvegicus GN=Eif2ak2 PE=1 SV=1	2	1.05682	0.713588
890	3.55	4.1	14.94	12.26	8.812	tr|G3V7E3|G3V7E3_RAT	Granzyme A OS=Rattus norvegicus GN=Gzma PE=3 SV=1	2	1.02802	0.883662
891	3.55	3.64	9.524	3.548	2.241	sp|Q80U96|XPO1_RAT	Exportin-1 OS=Rattus norvegicus GN=Xpo1 PE=2 SV=1	2	1.04713	0.902565
892	3.55	3.63	12.84	7.471	7.471	tr|D3Z8Y0|D3Z8Y0_RAT	Sorting nexin-1 OS=Rattus norvegicus GN=Snx1 PE=4 SV=1	3	1.04713	0.989132
893	3.55	3.55	32.39	25.35	25.35	sp|P29419|ATP5I_RAT	ATP synthase subunit e, mitochondrial OS=Rattus norvegicus GN=Atp5i PE=1 SV=3	2	1.65959	0.646905
894	3.54	4.19	10.2	4.102	3.548	tr|D3Z941|D3Z941_RAT	Protein Mars OS=Rattus norvegicus GN=Mars PE=3 SV=1	3	0.981748	0.965325
895	3.54	3.54	8.475	6.356	4.449	tr|Q3MID4|Q3MID4_RAT	Carbohydrate kinase-like, isoform CRA_b OS=Rattus norvegicus GN=Shpk PE=2 SV=1	2	0.474242	0.310019
896	3.52	3.54	3.619	1.888	1.888	tr|D4AB17|D4AB17_RAT	Protein Pfas OS=Rattus norvegicus GN=Pfas PE=4 SV=1	3	0.772681	0.309441
897	3.52	3.54	21.16	10.05	10.05	tr|D4A565|D4A565_RAT	NADH dehydrogenase (Ubiquinone) 1 beta subcomplex, 5 (Predicted), isoform CRA_b OS=Rattus norvegicus GN=Ndufb5 PE=4 SV=1	2	0.751623	0.60823
898	3.52	3.52	17.37	12.28	6.287	tr|G3V6A5|G3V6A5_RAT	Heterogeneous nuclear ribonucleoprotein D, isoform CRA_c OS=Rattus norvegicus GN=Hnrpd PE=4 SV=1	2	0.972747	0.934176
899	3.51	3.55	8.797	5.433	2.717	sp|P32198|CPT1A_RAT	Carnitine O-palmitoyltransferase 1, liver isoform OS=Rattus norvegicus GN=Cpt1a PE=1 SV=2	2	0.591562	0.35018
900	3.51	3.52	9.24	4.928	4.928	sp|Q6IN36|WIPF1_RAT	WAS/WASL-interacting protein family member 1 OS=Rattus norvegicus GN=Wipf1 PE=1 SV=2	2	1.24738	0.559383
901	3.51	3.51	7.5	6.389	6.389	sp|Q5HZV9|PP1R7_RAT	Protein phosphatase 1 regulatory subunit 7 OS=Rattus norvegicus GN=Ppp1r7 PE=1 SV=1	2	1.0666	0.770853
902	3.5	5.76	4.747	2.152	1.772	tr|F1LTF8|F1LTF8_RAT	Uncharacterized protein (Fragment) OS=Rattus norvegicus PE=4 SV=1	3	1.01859	0.837682
903	3.48	3.48	11.25	6	6	tr|D4A9M8|D4A9M8_RAT	Retinoid-inducible serine carboxypeptidase OS=Rattus norvegicus GN=Scpep1 PE=4 SV=1	2	0.981748	0.934978
904	3.46	5.77	10.11	7.83	4.241	tr|D3ZWL6|D3ZWL6_RAT	Adenosylhomocysteinase OS=Rattus norvegicus GN=Ahcyl2 PE=3 SV=1	3	0.855067	0.751265
905	3.46	3.46	9.471	6.128	6.128	sp|P49432|ODPB_RAT	Pyruvate dehydrogenase E1 component subunit beta, mitochondrial OS=Rattus norvegicus GN=Pdhb PE=1 SV=2	2	0.963829	0.976346
906	3.44	3.44	9.615	9.615	6.923	sp|P14141|CAH3_RAT	Carbonic anhydrase 3 OS=Rattus norvegicus GN=Ca3 PE=1 SV=3	2	1.24738	0.521864
907	3.43	3.43	18.35	12.03	12.03	tr|D4A3I4|D4A3I4_RAT	Protein Btf3l4 OS=Rattus norvegicus GN=Btf3l4 PE=4 SV=1	2	1.41906	0.476774
908	3.42	3.45	8.941	3.164	2.338	tr|F1LNI0|F1LNI0_RAT	Glycerol-3-phosphate dehydrogenase, mitochondrial OS=Rattus norvegicus GN=Gpd2 PE=3 SV=1	2	0.903649	0.574385
909	3.4	3.4	13.38	6.338	6.338	sp|P21704|DNAS1_RAT	Deoxyribonuclease-1 OS=Rattus norvegicus GN=Dnase1 PE=2 SV=1	2	1.01859	0.949184
910	3.39	3.39	9.924	4.326	4.326	tr|D4AEL2|D4AEL2_RAT	Protein LOC680692 OS=Rattus norvegicus GN=Golm1 PE=4 SV=1	2	1.04713	0.890986
911	3.38	3.38	15.58	9.524	9.524	tr|B0BN51|B0BN51_RAT	Small nuclear ribonucleoprotein-associated protein OS=Rattus norvegicus GN=Snrpb PE=2 SV=1	2	0.613762	0.447456
912	3.36	11.7	15.03	11.56	11.56	tr|D3ZNL2|D3ZNL2_RAT	Lamina-associated polypeptide 2, isoform beta OS=Rattus norvegicus GN=Tmpo PE=4 SV=1	7	1.15878	0.58535
913	3.36	6.28	6.953	4.635	2.232	tr|Q7TP57|Q7TP57_RAT	Ab2-131 OS=Rattus norvegicus GN=Stat4 PE=2 SV=1	4	0.787046	0.165715
914	3.36	3.36	10.22	4.792	4.792	tr|F1M3F5|F1M3F5_RAT	Protein Mtch2 (Fragment) OS=Rattus norvegicus GN=Mtch2 PE=3 SV=1	3	0.619441	0.29797
915	3.35	3.36	7.385	7.385	7.385	sp|P97519|HMGCL_RAT	Hydroxymethylglutaryl-CoA lyase, mitochondrial OS=Rattus norvegicus GN=Hmgcl PE=2 SV=1	2	0.972747	0.947906
916	3.35	3.35	20	13.33	11.25	sp|Q9Z0T0|TPMT_RAT	Thiopurine S-methyltransferase OS=Rattus norvegicus GN=Tpmt PE=2 SV=1	2	1.1272	0.772357
917	3.34	78.8	23.47	19.76	19.08	tr|D4A111|D4A111_RAT	Procollagen, type VI, alpha 3 (Predicted), isoform CRA_a OS=Rattus norvegicus GN=Col6a3 PE=4 SV=1	49	1	0.983417
918	3.34	5.11	10	3.778	2.778	tr|F1LW74|F1LW74_RAT	Protein LOC100360623 (Fragment) OS=Rattus norvegicus GN=LOC100360623 PE=4 SV=1	3	0.824138	0.347827
919	3.33	3.65	6.683	5.489	4.296	sp|Q6P7P5|BZW1_RAT	Basic leucine zipper and W2 domain-containing protein 1 OS=Rattus norvegicus GN=Bzw1 PE=2 SV=1	2	0.698232	0.401895
920	3.32	3.32	23.08	17.31	13.46	tr|D3ZF13|D3ZF13_RAT	Acyl carrier protein OS=Rattus norvegicus GN=LOC683884 PE=3 SV=1	2	1.00925	0.98291
921	3.32	3.32	20.42	13.38	13.38	tr|F1LS90|F1LS90_RAT	Glia maturation factor beta OS=Rattus norvegicus GN=Gmfb PE=4 SV=1	2	1.08643	0.602498
922	3.32	3.32	20.45	13.64	13.64	tr|F1M185|F1M185_RAT	40S ribosomal protein S12 (Fragment) OS=Rattus norvegicus PE=3 SV=1	2	0.954993	0.939235
923	3.31	3.32	23.83	13.47	13.47	tr|Q6P796|Q6P796_RAT	Protein Spint2 OS=Rattus norvegicus GN=Spint2 PE=2 SV=1	2	1.11686	0.791807
924	3.31	3.31	9.225	9.225	9.225	sp|P00774|CEL2A_RAT	Chymotrypsin-like elastase family member 2A OS=Rattus norvegicus GN=Cela2a PE=2 SV=1	2	2.10863	0.321283
925	3.3	3.3	8.917	7.006	7.006	sp|Q498D9|GIPC2_RAT	PDZ domain-containing protein GIPC2 OS=Rattus norvegicus GN=Gipc2 PE=2 SV=1	2	0.990832	0.995637
926	3.29	4.79	16.69	4.734	3.314	sp|P43244|MATR3_RAT	Matrin-3 OS=Rattus norvegicus GN=Matr3 PE=1 SV=2	4	1.08643	0.706236
927	3.29	3.32	9.496	8.754	5.341	sp|P13264|GLSK_RAT	Glutaminase kidney isoform, mitochondrial OS=Rattus norvegicus GN=Gls PE=1 SV=2	2	1.07647	0.93982
928	3.29	3.29	31.24	9.091	5.594	tr|D4A2K3|D4A2K3_RAT	Protein LOC680182 OS=Rattus norvegicus GN=LOC680182 PE=4 SV=1	2	1.09648	0.770727
929	3.29	3.29	20.61	10.09	10.09	tr|F1LM67|F1LM67_RAT	Ubiquitin carboxyl-terminal hydrolase isozyme L3 (Fragment) OS=Rattus norvegicus GN=Uchl3 PE=4 SV=1	3	1.0666	0.976878
930	3.28	3.29	15.24	12.2	12.2	tr|D4A4U3|D4A4U3_RAT	Protein Mdp1 OS=Rattus norvegicus GN=Mdp1 PE=4 SV=1	2	0.981748	0.963978
931	3.28	3.28	29.73	10.14	10.14	sp|P69736|EDF1_RAT	Endothelial differentiation-related factor 1 OS=Rattus norvegicus GN=Edf1 PE=1 SV=1	2	1.28233	0.59399
932	3.27	3.42	10.84	4.926	3.12	sp|Q8VHE9|RETST_RAT	All-trans-retinol 13,14-reductase OS=Rattus norvegicus GN=Retsat PE=2 SV=1	2	0.724436	0.545316
933	3.27	3.27	5.462	4.412	3.151	tr|Q68FY4|Q68FY4_RAT	Group specific component OS=Rattus norvegicus GN=Gc PE=2 SV=1	2	0.903649	0.825074
934	3.26	3.35	6.025	2.176	2.176	tr|D4A5F4|D4A5F4_RAT	Protein RGD1311575 OS=Rattus norvegicus GN=RGD1311575 PE=4 SV=1	2	1.07647	0.835452
935	3.26	3.26	27.2	13.6	13.6	tr|D3ZVF5|D3ZVF5_RAT	Protein RGD1562547 OS=Rattus norvegicus GN=Rpl31l20 PE=4 SV=1	2	1.1695	0.688796
936	3.26	3.26	5.353	4.38	4.38	sp|P17046|LAMP2_RAT	Lysosome-associated membrane glycoprotein 2 OS=Rattus norvegicus GN=Lamp2 PE=1 SV=2	2	0.685488	0.41741
937	3.25	3.28	7.87	3.358	2.623	tr|D3ZJ92|D3ZJ92_RAT	Pre-mRNA processing factor 40 homolog A (Yeast) (Predicted) OS=Rattus norvegicus GN=Prpf40a PE=4 SV=1	2	0.666807	0.320405
938	3.25	3.25	4.823	4.113	4.113	tr|F1LSM4|F1LSM4_RAT	Protein Scamp3 (Fragment) OS=Rattus norvegicus GN=Scamp3 PE=3 SV=1	2	1.23595	0.677146
939	3.25	3.25	14.86	9.459	9.459	sp|Q05820|LYSC2_RAT	Putative lysozyme C-2 OS=Rattus norvegicus GN=Lyz2 PE=5 SV=1	2	0.469894	0.522724
940	3.24	3.24	5.452	4.878	3.443	tr|E9PTS3|E9PTS3_RAT	Protein Susd2 OS=Rattus norvegicus GN=Susd2 PE=4 SV=1	2	0.912011	0.800635
941	3.24	3.24	23.39	14.52	14.52	tr|D3ZZQ4|D3ZZQ4_RAT	Protein RGD1561459 OS=Rattus norvegicus GN=RGD1561459 PE=4 SV=1	2	1.13763	0.778491
942	3.22	3.73	5.018	5.018	4.122	sp|Q6MG55|ABHGA_RAT	Abhydrolase domain-containing protein 16A OS=Rattus norvegicus GN=Abhd16a PE=2 SV=1	2
943	3.22	3.31	36.24	22.48	6.881	tr|G3V983|G3V983_RAT	Glutathione S-transferase Mu 1 OS=Rattus norvegicus GN=Gstm1 PE=3 SV=1	2	1.49969	0.319173
944	3.22	3.22	8.73	4.96	3.571	sp|Q6AYB5|SRP54_RAT	Signal recognition particle 54 kDa protein OS=Rattus norvegicus GN=Srp54 PE=2 SV=1	2	1.05682	0.707068
945	3.21	3.5	9.045	5.276	5.276	tr|Q5I0N0|Q5I0N0_RAT	Arylacetamide deacetylase OS=Rattus norvegicus GN=Aadac PE=2 SV=1	4	1.0666	0.875468
946	3.2	3.2	10.62	6.72	5.242	sp|Q9QUL6|NSF_RAT	Vesicle-fusing ATPase OS=Rattus norvegicus GN=Nsf PE=1 SV=1	4	1.22462	0.638005
947	3.19	3.21	6.101	2.083	1.339	sp|O35821|MBB1A_RAT	Myb-binding protein 1A OS=Rattus norvegicus GN=Mybbp1a PE=2 SV=2	2	0.83946	0.411242
948	3.19	3.19	8.299	8.299	8.299	tr|F8WG81|F8WG81_RAT	Protein Hras (Fragment) OS=Rattus norvegicus GN=Hras PE=4 SV=1	2	1.09648	0.333923
949	3.18	3.18	5.722	3.678	2.589	tr|F1M7X5|F1M7X5_RAT	Dipeptidyl peptidase 4 OS=Rattus norvegicus GN=Dpp4 PE=4 SV=1	2	0.794328	0.632225
950	3.16	3.16	22.43	22.43	16.82	sp|Q9ESH6|GLRX1_RAT	Glutaredoxin-1 OS=Rattus norvegicus GN=Glrx PE=2 SV=3	2	1.00925	0.9448
951	3.15	3.15	17.32	12.85	12.85	sp|P0C5H9|MANF_RAT	Mesencephalic astrocyte-derived neurotrophic factor OS=Rattus norvegicus GN=Manf PE=1 SV=1	2	1.23595	0.372912
952	3.14	3.14	12.16	8.559	8.559	tr|G3V9P0|G3V9P0_RAT	26S proteasome non-ATPase regulatory subunit 9 OS=Rattus norvegicus GN=Psmd9 PE=4 SV=1	2	0.824138	0.618741
953	3.14	3.14	7.947	7.947	7.947	sp|Q5PPJ4|DOHH_RAT	Deoxyhypusine hydroxylase OS=Rattus norvegicus GN=Dohh PE=2 SV=1	2	1.0666	0.810021
954	3.13	3.33	28.57	21.43	17.14	tr|D3ZZR9|D3ZZR9_RAT	Peptidyl-prolyl cis-trans isomerase OS=Rattus norvegicus GN=Fkbp2 PE=4 SV=1	2	0.928966	0.968969
955	3.12	3.13	3.689	3.005	2.322	tr|G3V9E4|G3V9E4_RAT	Acylamino-acid-releasing enzyme OS=Rattus norvegicus GN=Apeh PE=4 SV=1	2	0.731139	0.666624
956	3.11	3.11	13.79	10.92	10.92	sp|Q27W01|RBM8A_RAT	RNA-binding protein 8A OS=Rattus norvegicus GN=Rbm8a PE=2 SV=1	2	1.03753	0.920712
957	3.1	3.12	6.452	5.974	3.584	sp|P98089|MUC2L_RAT	Intestinal mucin-like protein (Fragment) OS=Rattus norvegicus PE=2 SV=1	3	1.21339	0.352019
958	3.1	3.1	39.23	20.77	20.77	tr|D4A3V2|D4A3V2_RAT	NADH dehydrogenase [ubiquinone] 1 alpha subcomplex subunit 6 OS=Rattus norvegicus GN=Ndufa6 PE=3 SV=1	2	0.758578	0.286835
959	3.07	3.07	25.19	13.53	4.135	sp|P56571|ES1_RAT	ES1 protein homolog, mitochondrial OS=Rattus norvegicus PE=1 SV=2	1	1.01859	0.828467
960	3.06	4.3	10.5	4.362	3.554	tr|G3V7X2|G3V7X2_RAT	Secretogranin 2, isoform CRA_a OS=Rattus norvegicus GN=Scg2 PE=4 SV=1	3	1.33045	0.500426
961	3.05	3.15	7.242	2.083	2.083	tr|D4A9G0|D4A9G0_RAT	Uncharacterized protein OS=Rattus norvegicus GN=RGD1308297 PE=4 SV=1	2	1.70608	0.242956
962	3.04	3.06	18.15	10.46	6.154	sp|B0BNA7|EIF3I_RAT	Eukaryotic translation initiation factor 3 subunit I OS=Rattus norvegicus GN=Eif3i PE=2 SV=1	2	0.887156	0.687469
963	3.04	3.04	14.19	3.548	3.548	tr|B1H277|B1H277_RAT	Pgm2 protein OS=Rattus norvegicus GN=Pgm2 PE=2 SV=1	3	0.83946	0.731368
964	3.03	3.07	10.93	6.431	6.431	sp|P32089|TXTP_RAT	Tricarboxylate transport protein, mitochondrial OS=Rattus norvegicus GN=Slc25a1 PE=1 SV=1	2	0.887156	0.81454
965	3	3	5.966	3.551	2.557	sp|P41777|NOLC1_RAT	Nucleolar and coiled-body phosphoprotein 1 OS=Rattus norvegicus GN=Nolc1 PE=1 SV=1	2	1.1272	0.673778
966	3	3	25.82	18.68	8.791	tr|A0JN30|A0JN30_RAT	Canopy 2 homolog (Zebrafish) OS=Rattus norvegicus GN=Cnpy2 PE=2 SV=1	1	1.15878	0.2371
967	2.99	2.99	5.313	1.455	1.455	tr|D4A554|D4A554_RAT	Protein Eif4g3 OS=Rattus norvegicus GN=Eif4g3 PE=4 SV=1	2	0.416869	0.271683
968	2.99	2.99	10.88	8.808	8.808	sp|P62749|HPCL1_RAT	Hippocalcin-like protein 1 OS=Rattus norvegicus GN=Hpcal1 PE=1 SV=2	2	1.09648	0.554199
969	2.97	3.01	6.927	4.085	4.085	sp|Q5XIA1|NCLN_RAT	Nicalin OS=Rattus norvegicus GN=Ncln PE=2 SV=1	3	1.27057	0.290007
970	2.97	2.97	8	7	4.6	sp|Q9EPB1|DPP2_RAT	Dipeptidyl peptidase 2 OS=Rattus norvegicus GN=Dpp7 PE=1 SV=1	2	1.07647	0.755616
971	2.96	2.96	7.94	7.511	3.648	tr|F1MAR8|F1MAR8_RAT	Protein Tapbp OS=Rattus norvegicus GN=Tapbp PE=4 SV=1	2	0.879022	0.670022
972	2.96	2.96	12.28	5.263	5.263	sp|Q66H74|GLP3L_RAT	Golgi phosphoprotein 3-like OS=Rattus norvegicus GN=Golph3l PE=2 SV=1	2	0.972747	0.966523
973	2.93	3	3.846	0.741	0.741	tr|D3ZXK3|D3ZXK3_RAT	Protein Tacc2 OS=Rattus norvegicus GN=Tacc2 PE=4 SV=1	2	0.981748	0.978631
974	2.92	2.92	5.727	4.626	4.626	sp|Q6MG97|BTNL2_RAT	Butyrophilin-like protein 2 OS=Rattus norvegicus GN=Btnl2 PE=3 SV=1	2	0.990832	0.995753
975	2.89	2.93	16.03	7.806	1.899	sp|P46413|GSHB_RAT	Glutathione synthetase OS=Rattus norvegicus GN=Gss PE=1 SV=1	1	1.05682	0.588059
976	2.87	9.18	25.43	15.81	15.81	tr|D3ZDA1|D3ZDA1_RAT	DNA-binding protein A OS=Rattus norvegicus GN=Csda PE=4 SV=1	6	0.847227	0.752286
977	2.86	2.87	14.26	7.129	7.129	tr|B2RYP4|B2RYP4_RAT	Protein Snx2 OS=Rattus norvegicus GN=Snx2 PE=2 SV=1	4
978	2.85	2.89	11.81	4.63	4.63	tr|Q5M963|Q5M963_RAT	Cytidine monophosphate N-acetylneuraminic acid synthetase OS=Rattus norvegicus GN=Cmas PE=2 SV=1	2	1.10662	0.766435
979	2.85	2.85	9.959	6.432	2.075	tr|E9PTL9|E9PTL9_RAT	Protein Ddx19b OS=Rattus norvegicus GN=Ddx19b PE=4 SV=1	1	0.990832	0.928502
980	2.85	2.85	4.011	3.009	2.364	sp|B5DFC9|NID2_RAT	Nidogen-2 OS=Rattus norvegicus GN=Nid2 PE=2 SV=1	3	0.972747	0.966638
981	2.84	2.88	9.572	5.29	5.29	sp|P63036|DNJA1_RAT	DnaJ homolog subfamily A member 1 OS=Rattus norvegicus GN=Dnaja1 PE=2 SV=1	2	1.04713	0.715749
982	2.84	2.86	9.396	5.705	5.705	tr|Q6P751|Q6P751_RAT	Cyclin dependent kinase 2 OS=Rattus norvegicus GN=Cdk2 PE=2 SV=1	2	0.954993	0.900289
983	2.84	2.84	5.8	2.148	1.396	sp|O88453|SAFB1_RAT	Scaffold attachment factor B1 OS=Rattus norvegicus GN=Safb PE=1 SV=2	2	1.19124	0.486776
984	2.83	2.83	6.825	4.286	4.286	tr|G3V8R7|G3V8R7_RAT	GATA zinc finger domain containing 2A OS=Rattus norvegicus GN=Gatad2a PE=4 SV=1	2	1.00925	0.967999
985	2.83	2.83	3.586	2.258	2.258	tr|F1LM63|F1LM63_RAT	Protein Stt3a OS=Rattus norvegicus GN=Stt3a PE=4 SV=1	2	0.487529	0.264385
986	2.81	4.72	18.35	11.17	8.245	tr|F1LR89|F1LR89_RAT	Actin-related protein 2/3 complex subunit 1B OS=Rattus norvegicus GN=Arpc1b PE=4 SV=1	4	0.862979	0.377518
987	2.81	3.35	9.234	3.673	3.148	tr|G3V8B6|G3V8B6_RAT	26S proteasome non-ATPase regulatory subunit 1 OS=Rattus norvegicus GN=Psmd1 PE=4 SV=1	2	0.963829	0.874484
988	2.81	2.81	8.709	2.333	2.333	tr|G3V7V3|G3V7V3_RAT	Protein Slc27a4 OS=Rattus norvegicus GN=Slc27a4 PE=4 SV=1	2	0.903649	0.802743
989	2.81	2.81	28.48	17.22	11.92	sp|Q4KLF8|ARPC5_RAT	Actin-related protein 2/3 complex subunit 5 OS=Rattus norvegicus GN=Arpc5 PE=1 SV=3	2	1.05682	0.761128
990	2.79	4.17	9.382	5.97	3.412	sp|Q9JID1|PDCD4_RAT	Programmed cell death protein 4 OS=Rattus norvegicus GN=Pdcd4 PE=1 SV=2	2	1.27057	0.601767
991	2.79	2.81	7.937	2.317	0.8111	tr|E9PTK8|E9PTK8_RAT	Protein Lmo7 OS=Rattus norvegicus GN=Lmo7 PE=4 SV=1	2	0.963829	0.927549
992	2.79	2.8	7.064	3.974	3.974	tr|Q6IMX8|Q6IMX8_RAT	Acyl-CoA thioesterase 2 OS=Rattus norvegicus GN=Acot2 PE=2 SV=1	2	0.928966	0.755742
993	2.79	2.8	24.19	15.32	15.32	tr|F1M6F4|F1M6F4_RAT	Protein RGD1564597 (Fragment) OS=Rattus norvegicus GN=RGD1564597 PE=4 SV=1	2	1.02802	0.932708
994	2.78	4.94	6.907	3.604	2.703	tr|G3V9U7|G3V9U7_RAT	ATPase, Ca++ transporting, ubiquitous, isoform CRA_b OS=Rattus norvegicus GN=Atp2a3 PE=3 SV=1	3	1.05682	0.872327
995	2.77	2.86	6.899	2.66	1.164	tr|G3V7I8|G3V7I8_RAT	RCG57812, isoform CRA_b OS=Rattus norvegicus GN=Slk PE=4 SV=1	1	0.816582	0.591672
996	2.75	2.78	13.59	10.87	10.87	sp|Q62636|RAP1B_RAT	Ras-related protein Rap-1b OS=Rattus norvegicus GN=Rap1b PE=2 SV=2	2	1.00925	0.930465
997	2.73	2.75	9.533	4.462	4.462	tr|Q5U2N2|Q5U2N2_RAT	Ubiquitin carboxyl-terminal hydrolase OS=Rattus norvegicus GN=Usp14 PE=2 SV=1	2	1.00925	0.885513
998	2.72	2.72	10.75	5.263	3.728	tr|D4AEP0|D4AEP0_RAT	Adenylosuccinate synthetase OS=Rattus norvegicus GN=Adss PE=3 SV=1	3	0.928966	0.518461
999	2.72	2.72	17.05	17.05	8.527	tr|F1M7T1|F1M7T1_RAT	Protein LOC100361934 OS=Rattus norvegicus GN=LOC100361934 PE=4 SV=1	1	0.648634	0.541562
1000	2.72	2.72	4.355	4.355	4.355	tr|Q5U2U8|Q5U2U8_RAT	Bcl2-associated athanogene 3 OS=Rattus norvegicus GN=Bag3 PE=2 SV=1	2	0.946237	0.893444
1001	2.71	3.8	8.896	7.669	6.135	tr|D4A991|D4A991_RAT	Leukocyte surface antigen CD47 OS=Rattus norvegicus GN=Cd47 PE=4 SV=1	3	0.981748	0.987771
1002	2.69	5.85	24.14	24.14	19.83	sp|Q63362|NDUA5_RAT	NADH dehydrogenase [ubiquinone] 1 alpha subcomplex subunit 5 OS=Rattus norvegicus GN=Ndufa5 PE=1 SV=3	4	1.00925	0.833891
1003	2.69	2.69	5.598	2.305	2.305	tr|F1LNM0|F1LNM0_RAT	Disks large homolog 1 OS=Rattus norvegicus GN=Dlg1 PE=4 SV=1	2	1.25892	0.572922
1004	2.69	2.69	15.31	8.673	8.163	tr|D4AE79|D4AE79_RAT	Protein Chmp1a OS=Rattus norvegicus GN=Chmp1a PE=4 SV=1	2	0.937562	0.747484
1005	2.69	2.69	6.752	6.752	6.752	tr|F1M7R6|F1M7R6_RAT	Protein NDRG3 (Fragment) OS=Rattus norvegicus GN=Ndrg3 PE=4 SV=1	2	0.636796	0.262549
1006	2.67	2.67	11.97	11.97	11.97	sp|B0BNA5|COTL1_RAT	Coactosin-like protein OS=Rattus norvegicus GN=Cotl1 PE=1 SV=1	2	0.990832	0.980117
1007	2.66	2.66	9.841	5.714	5.714	tr|Q3MID6|Q3MID6_RAT	Calumenin OS=Rattus norvegicus GN=Calu PE=2 SV=1	2	1.1695	0.530712
1008	2.65	2.67	19.01	10.65	4.943	sp|P62703|RS4X_RAT	40S ribosomal protein S4, X isoform OS=Rattus norvegicus GN=Rps4x PE=2 SV=2	2
1009	2.65	2.65	19.69	14.51	11.4	tr|B2RYP0|B2RYP0_RAT	Protein Rhoc OS=Rattus norvegicus GN=Rhoc PE=2 SV=1	3	1.08643	0.858472
1010	2.64	3.89	6.098	5.052	4.007	sp|O70513|LG3BP_RAT	Galectin-3-binding protein OS=Rattus norvegicus GN=Lgals3bp PE=1 SV=2	2	1.59956	0.433817
1011	2.64	2.65	10.34	7.524	2.821	sp|Q811X6|CRYL1_RAT	Lambda-crystallin homolog OS=Rattus norvegicus GN=Cryl1 PE=2 SV=3	1	0.972747	0.964236
1012	2.63	2.65	6.499	4.193	1.328	tr|Q7TPJ1|Q7TPJ1_RAT	Ac2-233 OS=Rattus norvegicus GN=Igtp PE=2 SV=1	2	0.625173	0.199968
1013	2.63	2.63	5.965	3.688	0.9761	tr|F1LM55|F1LM55_RAT	Protein RGD1309922 OS=Rattus norvegicus GN=RGD1309922 PE=4 SV=1	1	1.13763	0.2969
1014	2.61	2.61	3.432	2.652	2.652	tr|F1LSQ0|F1LSQ0_RAT	FAS-associated factor 1 OS=Rattus norvegicus GN=Faf1 PE=4 SV=1	2	1.34276	0.415919
1015	2.6	2.61	4.621	2.207	1.655	sp|O54728|PLB1_RAT	Phospholipase B1, membrane-associated OS=Rattus norvegicus GN=Plb1 PE=1 SV=1	2	1.33045	0.402314
1016	2.58	2.65	8.01	4.91	4.91	sp|B0BN56|RT31_RAT	28S ribosomal protein S31, mitochondrial OS=Rattus norvegicus GN=Mrps31 PE=2 SV=1	3	0.92045	0.879772
1017	2.57	2.57	5.611	5.611	2.97	sp|Q9WVK3|PECR_RAT	Peroxisomal trans-2-enoyl-CoA reductase OS=Rattus norvegicus GN=Pecr PE=2 SV=1	1	1.02802	0.916865
1018	2.56	2.76	7.445	4.907	2.03	tr|D3Z9V9|D3Z9V9_RAT	Uncharacterized protein OS=Rattus norvegicus PE=4 SV=1	1	0.879022	0.689779
1019	2.56	2.56	11.53	4.746	2.203	sp|Q66H68|RBM47_RAT	RNA-binding protein 47 OS=Rattus norvegicus GN=Rbm47 PE=2 SV=1	1	1.0666	0.865011
1020	2.56	2.56	14.46	7.53	4.518	sp|Q63525|NUDC_RAT	Nuclear migration protein nudC OS=Rattus norvegicus GN=Nudc PE=1 SV=1	2	0.981748	0.823537
1021	2.56	2.56	23.23	18.18	11.11	tr|D4A4P3|D4A4P3_RAT	Protein LOC100361144 OS=Rattus norvegicus GN=LOC100361144 PE=4 SV=1	1	0.831764	0.69282
1022	2.55	2.55	20.99	20.37	16.67	tr|Q5U3Y8|Q5U3Y8_RAT	Basic transcription factor 3 OS=Rattus norvegicus GN=Btf3 PE=2 SV=1	3	1	0.963657
1023	2.51	2.51	10.55	6.374	3.956	sp|P07687|HYEP_RAT	Epoxide hydrolase 1 OS=Rattus norvegicus GN=Ephx1 PE=1 SV=1	2	0.963829	0.992237
1024	2.49	2.49	14.43	12.37	8.247	sp|P62083|RS7_RAT	40S ribosomal protein S7 OS=Rattus norvegicus GN=Rps7 PE=1 SV=1	3	1.01859	0.894138
1025	2.48	2.48	6.648	3.878	1.247	sp|P07896|ECHP_RAT	Peroxisomal bifunctional enzyme OS=Rattus norvegicus GN=Ehhadh PE=1 SV=2	1	1.67494	0.409031
1026	2.47	3.86	19.23	12.94	5.594	tr|O89035|O89035_RAT	Mitochondrial dicarboxylate carrier OS=Rattus norvegicus GN=Slc25a10 PE=2 SV=1	3	0.847227	0.650693
1027	2.47	2.56	12.66	12.66	7.86	sp|Q6AYK6|CYBP_RAT	Calcyclin-binding protein OS=Rattus norvegicus GN=Cacybp PE=1 SV=1	2	1.44544	0.508403
1028	2.47	2.47	21.94	13.78	13.78	sp|Q9JLT6|BID_RAT	BH3-interacting domain death agonist OS=Rattus norvegicus GN=Bid PE=2 SV=2	2	1.34276	0.465144
1029	2.47	2.47	19.42	19.42	12.62	sp|Q6PDU7|ATP5L_RAT	ATP synthase subunit g, mitochondrial OS=Rattus norvegicus GN=Atp5l PE=1 SV=2	1	1.03753	0.92895
1030	2.46	2.49	6.434	2.206	2.206	sp|Q9Z1X1|ESYT1_RAT	Extended synaptotagmin-1 OS=Rattus norvegicus GN=Esyt1 PE=2 SV=1	2	0.847227	0.669305
1031	2.45	2.45	11.18	6.986	3.194	sp|O08816|WASL_RAT	Neural Wiskott-Aldrich syndrome protein OS=Rattus norvegicus GN=Wasl PE=1 SV=2	2	0.92045	0.853143
1032	2.45	2.45	6.684	4.113	2.057	tr|Q6PCT9|Q6PCT9_RAT	Proteasome (Prosome, macropain) 26S subunit, non-ATPase, 6 OS=Rattus norvegicus GN=Psmd6 PE=2 SV=1	1	0.946237	0.909692
1033	2.44	2.51	31.43	24.29	14.29	tr|D4AD70|D4AD70_RAT	Protein RGD1561636 OS=Rattus norvegicus GN=RGD1561636 PE=3 SV=1	1	1.23595	0.676919
1034	2.44	2.44	29.41	9.559	5.147	tr|D4A0P4|D4A0P4_RAT	Histone H3 OS=Rattus norvegicus GN=Hist3h3 PE=3 SV=1	1	1.02802	0.984567
1035	2.42	2.42	15.22	7.971	5.435	sp|Q497B0|NIT2_RAT	Omega-amidase NIT2 OS=Rattus norvegicus GN=Nit2 PE=1 SV=1	1	0.972747	0.974679
1036	2.41	2.47	14.29	7.834	7.834	sp|P97576|GRPE1_RAT	GrpE protein homolog 1, mitochondrial OS=Rattus norvegicus GN=Grpel1 PE=1 SV=2	2	1.05682	0.794168
1037	2.41	2.41	4.528	3.543	3.543	sp|Q6AY96|T2FA_RAT	General transcription factor IIF subunit 1 OS=Rattus norvegicus GN=Gtf2f1 PE=2 SV=1	2	1.75388	0.381809
1038	2.4	2.4	26.84	18.95	14.74	sp|Q5BK20|HN1L_RAT	Hematological and neurological expressed 1-like protein OS=Rattus norvegicus GN=Hn1l PE=2 SV=1	2	1.24738	0.587645
1039	2.4	2.4	7.417	4.604	3.069	tr|Q9ESS9|Q9ESS9_RAT	Homocysteine-inducible, endoplasmic reticulum stress-inducible, ubiquitin-like domain member 1 OS=Rattus norvegicus GN=Herpud1 PE=2 SV=1	1	1.04713	0.910872
1040	2.39	6.14	19.31	16.51	13.71	tr|F1LPS8|F1LPS8_RAT	Transcriptional activator protein Pur-alpha OS=Rattus norvegicus GN=Pura PE=4 SV=1	4	1.02802	0.919164
1041	2.39	2.39	19.48	14.29	9.74	tr|B5DFN4|B5DFN4_RAT	Prefoldin 5 (Predicted), isoform CRA_a OS=Rattus norvegicus GN=Pfdn5 PE=2 SV=1	1	0.972747	0.953913
1042	2.38	2.85	7.81	3.396	2.377	tr|Q68FT7|Q68FT7_RAT	Phenylalanyl-tRNA synthetase, beta subunit OS=Rattus norvegicus GN=Farsb PE=2 SV=1	2	0.660694	0.391489
1043	2.37	2.38	9.964	4.982	2.669	tr|F1LQJ4|F1LQJ4_RAT	Carboxylesterase 1E OS=Rattus norvegicus GN=Ces1e PE=4 SV=1	1	0.847227	0.751974
1044	2.36	2.82	11.63	6.931	3.713	sp|B1H267|SNX5_RAT	Sorting nexin-5 OS=Rattus norvegicus GN=Snx5 PE=1 SV=1	1	1.02802	0.937368
1045	2.36	2.36	6.66	2.114	1.374	tr|D3ZAX5|D3ZAX5_RAT	Protein Cherp OS=Rattus norvegicus GN=Cherp PE=4 SV=1	1
1046	2.36	2.36	11.64	8.358	5.075	tr|B0BMW7|B0BMW7_RAT	O-sialoglycoprotein endopeptidase, isoform CRA_b OS=Rattus norvegicus GN=Osgep PE=2 SV=1	1	0.613762	0.398085
1047	2.36	2.36	8.081	8.081	8.081	sp|D3ZW55|ITPA_RAT	Inosine triphosphate pyrophosphatase OS=Rattus norvegicus GN=Itpa PE=3 SV=1	2	0.586138	0.405715
1048	2.35	6.15	7.049	2.135	1.345	tr|G3V7L1|G3V7L1_RAT	Protein Utrn OS=Rattus norvegicus GN=Utrn PE=4 SV=1	5	0.879022	0.617655
1049	2.35	2.92	5.804	2.431	0.7059	tr|D4A0Y1|D4A0Y1_RAT	Protein Cfb OS=Rattus norvegicus GN=Cfb PE=3 SV=1	1	0.809096	0.512604
1050	2.35	2.36	11.76	5.08	1.872	sp|O35303-4|DNM1L_RAT	Isoform 4 of Dynamin-1-like protein OS=Rattus norvegicus GN=Dnm1l	1	0.737904	0.233878
1051	2.35	2.35	7.445	5.006	3.979	tr|F1LSA1|F1LSA1_RAT	CD44 antigen OS=Rattus norvegicus GN=Cd44 PE=4 SV=1	4	1.33045	0.460844
1052	2.35	2.35	6.232	6.232	3.966	tr|D3Z9E9|D3Z9E9_RAT	Protein Tmem30b OS=Rattus norvegicus GN=Tmem30b PE=4 SV=1	1	1.64437	0.399225
1053	2.33	2.4	12.35	7.647	2.941	sp|P54313|GBB2_RAT	Guanine nucleotide-binding protein G(I)/G(S)/G(T) subunit beta-2 OS=Rattus norvegicus GN=Gnb2 PE=1 SV=4	1	0.724436	0.665856
1054	2.33	2.33	5.062	1.575	0.8999	tr|G3V6X4|G3V6X4_RAT	E3 ubiquitin-protein ligase OS=Rattus norvegicus GN=Nedd4 PE=4 SV=1	1	0.937562	0.815112
1055	2.32	2.32	9.653	5.446	5.446	sp|O88637|PCY2_RAT	Ethanolamine-phosphate cytidylyltransferase OS=Rattus norvegicus GN=Pcyt2 PE=1 SV=1	2	1.75388	0.384878
1056	2.31	2.34	30.68	18.18	18.18	sp|D3ZAF6|ATPK_RAT	ATP synthase subunit f, mitochondrial OS=Rattus norvegicus GN=Atp5j2 PE=1 SV=1	2	0.630957	0.377821
1057	2.31	2.31	19.3	19.3	14.04	sp|P19944|RLA1_RAT	60S acidic ribosomal protein P1 OS=Rattus norvegicus GN=Rplp1 PE=3 SV=1	1	1.10662	0.830245
1058	2.3	2.91	8.726	2.201	0.7075	tr|D4ADW6|D4ADW6_RAT	Protein Ktn1 OS=Rattus norvegicus GN=Ktn1 PE=4 SV=1	1	0.895365	0.66654
1059	2.3	2.3	8.368	3.429	2.195	tr|B2RYJ9|B2RYJ9_RAT	Eps8l2 protein OS=Rattus norvegicus GN=Eps8l2 PE=2 SV=1	1	0.954993	0.921518
1060	2.29	2.73	10.92	5.747	2.49	tr|D3ZF39|D3ZF39_RAT	Protein Uap1 OS=Rattus norvegicus GN=Uap1 PE=4 SV=1	1	1.19124	0.690129
1061	2.29	2.31	7.821	5.128	2.308	sp|P30835|K6PL_RAT	6-phosphofructokinase, liver type OS=Rattus norvegicus GN=Pfkl PE=2 SV=3	1	1.47231	0.349315
1062	2.29	2.29	9.155	5.81	3.345	tr|F1LUD7|F1LUD7_RAT	Sphingosine-1-phosphate lyase 1 (Fragment) OS=Rattus norvegicus GN=Sgpl1 PE=3 SV=1	2	0.895365	0.475932
1063	2.29	2.29	7.903	3.191	1.52	sp|P18886|CPT2_RAT	Carnitine O-palmitoyltransferase 2, mitochondrial OS=Rattus norvegicus GN=Cpt2 PE=1 SV=1	1	1.08643	0.804634
1064	2.29	2.29	15.64	11.85	11.85	sp|Q5XI60|REEP6_RAT	Receptor expression-enhancing protein 6 OS=Rattus norvegicus GN=Reep6 PE=2 SV=1	3	0.981748	0.97491
1065	2.28	3.95	11.92	8.29	4.922	tr|D4A8Q6|D4A8Q6_RAT	Endophilin-B1 OS=Rattus norvegicus GN=Sh3glb1 PE=4 SV=1	2	1.31826	0.540773
1066	2.28	2.3	21.62	15.54	11.49	tr|G3V7K6|G3V7K6_RAT	Single-stranded DNA-binding protein OS=Rattus norvegicus GN=Ssbp1 PE=3 SV=1	2	1.90546	0.347778
1067	2.28	2.28	7.623	1.445	0.5979	tr|D3ZN52|D3ZN52_RAT	Protein Triobp OS=Rattus norvegicus GN=Triobp PE=4 SV=1	1	1.07647	0.854486
1068	2.27	2.31	10.39	3.578	3.578	tr|D4A6J8|D4A6J8_RAT	Protein Pof1b OS=Rattus norvegicus GN=Pof1b PE=4 SV=1	3	0.724436	0.455478
1069	2.27	2.27	13.02	4.339	3.353	sp|Q68FR2|BIN2_RAT	Bridging integrator 2 OS=Rattus norvegicus GN=Bin2 PE=2 SV=1	1	0.685488	0.492676
1070	2.26	2.98	8.456	8.456	3.676	sp|Q9EST6|AN32B_RAT	Acidic leucine-rich nuclear phosphoprotein 32 family member B OS=Rattus norvegicus GN=Anp32b PE=2 SV=1	1	1.08643	0.832836
1071	2.26	2.27	9.211	6.798	1.535	tr|Q6AYS3|Q6AYS3_RAT	Protective protein for beta-galactosidase OS=Rattus norvegicus GN=Ctsa PE=2 SV=1	2	0.981748	0.245842
1072	2.26	2.27	30	16.43	10.71	sp|P62832|RL23_RAT	60S ribosomal protein L23 OS=Rattus norvegicus GN=Rpl23 PE=2 SV=1	1	0.809096	0.518135
1073	2.26	2.26	12.97	8.229	3.491	tr|F1LMI4|F1LMI4_RAT	Dual-specificity mitogen-activated protein kinase kinase 2 OS=Rattus norvegicus GN=Map2k2 PE=4 SV=1	1	1.14815	0.77293
1074	2.25	3.62	8.531	5.095	2.251	tr|F1MAH5|F1MAH5_RAT	Uncharacterized protein OS=Rattus norvegicus GN=Ppp6r3-ps1 PE=4 SV=1	2	0.704693	0.486787
1075	2.24	2.24	13.1	11.31	6.548	tr|B2RZ72|B2RZ72_RAT	Actin related protein 2/3 complex, subunit 4 (Predicted), isoform CRA_a OS=Rattus norvegicus GN=Arpc4 PE=2 SV=1	1	0.912011	0.848642
1076	2.23	2.23	6.237	4.301	2.366	tr|G3V8A7|G3V8A7_RAT	Pancreatic lipase, isoform CRA_a OS=Rattus norvegicus GN=Pnlip PE=3 SV=1	1	1.57036	0.366659
1077	2.23	2.23	9.412	9.412	9.412	tr|D3ZZR5|D3ZZR5_RAT	Protein LOC100364748 OS=Rattus norvegicus GN=Snrpa1 PE=4 SV=1	2	1.41906	0.600025
1078	2.22	2.38	10.56	2.552	1.972	tr|G3V681|G3V681_RAT	Protein Mcm4 OS=Rattus norvegicus GN=Mcm4 PE=3 SV=1	2	1.02802	0.889309
1079	2.22	2.31	6.929	3.465	1.575	tr|Q4KLH7|Q4KLH7_RAT	Protein Rad21 OS=Rattus norvegicus GN=Rad21 PE=2 SV=1	1	1.11686	0.793575
1080	2.22	2.23	11.68	5.28	2.4	tr|B1WC61|B1WC61_RAT	Acad9 protein OS=Rattus norvegicus GN=Acad9 PE=2 SV=1	1	0.570164	0.16203
1081	2.22	2.22	5.06	5.06	3.133	tr|D4A415|D4A415_RAT	Protein Fam175b OS=Rattus norvegicus GN=Fam175b PE=4 SV=1	1	1.35519	0.36188
1082	2.21	4.32	11.28	6.47	3.327	tr|Q8R3Z7|Q8R3Z7_RAT	EH-domain containing 4 OS=Rattus norvegicus GN=Ehd4 PE=2 SV=1	3	0.879022	0.417964
1083	2.21	2.23	12.38	8.889	6.667	sp|P68101|IF2A_RAT	Eukaryotic translation initiation factor 2 subunit 1 OS=Rattus norvegicus GN=Eif2s1 PE=1 SV=2	2	0.954993	0.857239
1084	2.21	2.21	17.12	17.12	7.534	tr|F1M0X6|F1M0X6_RAT	Protein Magohb (Fragment) OS=Rattus norvegicus GN=Magohb PE=4 SV=1	1	0.765597	0.312209
1085	2.21	2.21	19.81	16.04	16.04	tr|B5DEL8|B5DEL8_RAT	NADH dehydrogenase (Ubiquinone) Fe-S protein 5 OS=Rattus norvegicus GN=Ndufs5 PE=4 SV=1	2	0.772681	0.505356
1086	2.2	2.2	17.11	7.383	7.383	sp|Q02974|KHK_RAT	Ketohexokinase OS=Rattus norvegicus GN=Khk PE=1 SV=1	2	1.04713	0.792832
1087	2.2	2.2	5.866	5.028	5.028	tr|B0BNG3|B0BNG3_RAT	Lman2 protein OS=Rattus norvegicus GN=Lman2 PE=2 SV=1	2	0.928966	0.780186
1088	2.19	4.32	16.67	9.091	5.455	sp|P62138|PP1A_RAT	Serine/threonine-protein phosphatase PP1-alpha catalytic subunit OS=Rattus norvegicus GN=Ppp1ca PE=1 SV=1	2	0.92045	0.977253
1089	2.18	2.69	16.74	14.1	6.608	tr|G3V6N2|G3V6N2_RAT	Protein Tmed4 OS=Rattus norvegicus GN=Tmed4 PE=3 SV=1	2	1.09648	0.818695
1090	2.18	2.18	9.146	6.707	3.455	tr|Q5D023|Q5D023_RAT	Cytoplasmic dynein 1 light intermediate chain 2 OS=Rattus norvegicus GN=Dync1li2 PE=2 SV=1	1	1.18032	0.691355
1091	2.17	2.41	7.387	4.063	1.662	tr|E9PTB2|E9PTB2_RAT	Uncharacterized protein OS=Rattus norvegicus PE=4 SV=1	1	0.870964	0.269882
1092	2.17	2.35	5.882	3.571	1.891	sp|P61621|S61A1_RAT	Protein transport protein Sec61 subunit alpha isoform 1 OS=Rattus norvegicus GN=Sec61a1 PE=2 SV=2	1	2.31206	0.276072
1093	2.17	2.2	23.08	5.594	3.497	sp|B2GUZ5|CAZA1_RAT	F-actin-capping protein subunit alpha-1 OS=Rattus norvegicus GN=Capza1 PE=1 SV=1	1	1.02802	0.940122
1094	2.17	2.17	20.28	9.434	6.604	tr|F1LP82|F1LP82_RAT	Ras-related protein Rab-2A OS=Rattus norvegicus GN=Rab2a PE=3 SV=1	1	1	0.968727
1095	2.16	2.32	11.63	10.3	3.987	sp|P20070|NB5R3_RAT	NADH-cytochrome b5 reductase 3 OS=Rattus norvegicus GN=Cyb5r3 PE=1 SV=2	2	0.654636	0.48254
1096	2.16	2.16	9.091	5.758	5.758	sp|P36202|PDLI4_RAT	PDZ and LIM domain protein 4 OS=Rattus norvegicus GN=Pdlim4 PE=2 SV=2	2	1.15878	0.752173
1097	2.16	2.16	9.179	9.179	4.348	sp|Q5FVL2|EMC8_RAT	ER membrane protein complex subunit 8 OS=Rattus norvegicus GN=Emc8 PE=2 SV=1	1	0.928966	0.890849
1098	2.15	3.14	47.06	47.06	30.88	tr|Q3KRE3|Q3KRE3_RAT	Guanine nucleotide-binding protein subunit gamma OS=Rattus norvegicus GN=Gng10 PE=2 SV=1	2	1.13763	0.784528
1099	2.13	2.68	12.08	9.27	7.865	sp|Q5M9G1|HEXI1_RAT	Protein HEXIM1 OS=Rattus norvegicus GN=Hexim1 PE=2 SV=1	2	1.59956	0.438795
1100	2.13	2.15	6.738	3.369	1.95	tr|Q7TP14|Q7TP14_RAT	Cc1-9 OS=Rattus norvegicus GN=Chid1 PE=2 SV=1	1	0.946237	0.846044
1101	2.13	2.13	5.75	3.226	2.384	tr|F1LS29|F1LS29_RAT	Calpain-1 catalytic subunit OS=Rattus norvegicus GN=Capn1 PE=4 SV=1	2	0.946237	0.921631
1102	2.12	2.12	9.069	4.412	2.696	sp|Q6AYS7|ACY1A_RAT	Aminoacylase-1A OS=Rattus norvegicus GN=Acy1a PE=1 SV=1	1	1.14815	0.776039
1103	2.12	2.12	13.02	9.896	7.292	tr|Q5U1Y2|Q5U1Y2_RAT	Protein Rac2 OS=Rattus norvegicus GN=Rac2 PE=2 SV=1	1	0.879022	0.817169
1104	2.12	2.12	26.55	19.47	19.47	sp|P61805|DAD1_RAT	Dolichyl-diphosphooligosaccharide--protein glycosyltransferase subunit DAD1 OS=Rattus norvegicus GN=Dad1 PE=2 SV=3	2	0.57544	0.39921
1105	2.12	2.12	18.7	18.7	18.7	tr|B0K010|B0K010_RAT	Protein Txndc17 OS=Rattus norvegicus GN=Txndc17 PE=2 SV=1	2	1.23595	0.669273
1106	2.11	2.11	12.59	7.037	4.815	sp|Q64537|CPNS1_RAT	Calpain small subunit 1 OS=Rattus norvegicus GN=Capns1 PE=1 SV=3	1	1.24738	0.542596
1107	2.1	2.1	14.22	9.633	6.422	tr|F1LY85|F1LY85_RAT	Eukaryotic translation initiation factor 4E (Fragment) OS=Rattus norvegicus GN=Eif4e PE=3 SV=1	1	1.22462	0.661212
1108	2.09	14.67	42.11	42.11	42.11	sp|P19804|NDKB_RAT	Nucleoside diphosphate kinase B OS=Rattus norvegicus GN=Nme2 PE=1 SV=1	12	1.0666	0.820803
1109	2.09	4.37	12.13	7.101	4.734	sp|O88994|MOSC2_RAT	MOSC domain-containing protein 2, mitochondrial OS=Rattus norvegicus GN=Marc2 PE=2 SV=1	2	0.855067	0.312155
1110	2.09	2.2	6.048	5.04	3.831	sp|Q8K1Q0|NMT1_RAT	Glycylpeptide N-tetradecanoyltransferase 1 OS=Rattus norvegicus GN=Nmt1 PE=2 SV=1	1	0.405508	0.263446
1111	2.09	2.09	10	3.387	2.419	tr|F1LPY9|F1LPY9_RAT	Lamin-B receptor OS=Rattus norvegicus GN=Lbr PE=4 SV=1	1	1.03753	0.92918
1112	2.09	2.09	6.464	4.753	2.662	tr|G3V9Z3|G3V9Z3_RAT	Amine oxidase [flavin-containing] A OS=Rattus norvegicus GN=Maoa PE=4 SV=1	1	0.801678	0.528832
1113	2.08	2.09	9.302	5.233	5.233	sp|Q811A2|BST2_RAT	Bone marrow stromal antigen 2 OS=Rattus norvegicus GN=Bst2 PE=1 SV=1	1	1.11686	0.75146
1114	2.08	2.08	28.23	16.27	16.27	sp|Q6P4Z9|CSN8_RAT	COP9 signalosome complex subunit 8 OS=Rattus norvegicus GN=Cops8 PE=2 SV=1	2	1.00925	0.97228
1115	2.08	2.08	24.42	18.6	10.47	tr|D3ZD09|D3ZD09_RAT	Cytochrome c oxidase subunit 6B1 OS=Rattus norvegicus GN=Cox6b1 PE=4 SV=1	1	1.40605	0.866361
1116	2.07	4.1	18.93	16.05	13.17	sp|Q9Z269|VAPB_RAT	Vesicle-associated membrane protein-associated protein B OS=Rattus norvegicus GN=Vapb PE=1 SV=3	2	1.03753	0.867253
1117	2.07	2.58	2.673	0.9274	0.6547	tr|F1MAD2|F1MAD2_RAT	Protein Inadl2 OS=Rattus norvegicus GN=Inadl2 PE=4 SV=1	1	1.5417	0.440297
1118	2.07	2.54	11.06	6.634	5.405	tr|Q6P6T6|Q6P6T6_RAT	Cathepsin D OS=Rattus norvegicus GN=Ctsd PE=2 SV=1	2	0.981748	0.835526
1119	2.07	2.51	9.971	4.106	2.639	tr|D4A7I1|D4A7I1_RAT	Protein Cab39 OS=Rattus norvegicus GN=Cab39 PE=4 SV=1	1	0.801678	0.449062
1120	2.07	2.22	12.35	2.573	1.715	tr|G8JLS4|G8JLS4_RAT	Optineurin OS=Rattus norvegicus GN=Optn PE=4 SV=1	1	1.02802	0.808024
1121	2.07	2.07	4.078	2.773	2.773	tr|G3V9T9|G3V9T9_RAT	Protein tyrosine phosphatase, non-receptor type 6, isoform CRA_a OS=Rattus norvegicus GN=Ptpn6 PE=4 SV=1	2	1.07647	0.852359
1122	2.07	2.07	4.754	3.934	1.475	sp|Q75Q39|TOM70_RAT	Mitochondrial import receptor subunit TOM70 OS=Rattus norvegicus GN=Tomm70a PE=1 SV=1	1	0.751623	0.185923
1123	2.07	2.07	20.16	20.16	13.71	tr|D4ADL4|D4ADL4_RAT	Tax1 (Human T-cell leukemia virus type I) binding protein 3, isoform CRA_a OS=Rattus norvegicus GN=Tax1bp3 PE=4 SV=1	1	0.972747	0.972121
1124	2.06	3.54	3.489	0.5233	0.1994	RRRRRtr|D3ZEA8|D3ZEA8_RAT	REVERSED Uncharacterized protein OS=Rattus norvegicus PE=4 SV=1	2
1125	2.06	2.08	4.742	1.423	0.7903	tr|G3V8P4|G3V8P4_RAT	RCG50226, isoform CRA_a OS=Rattus norvegicus GN=Ptprf PE=4 SV=1	1	1.39316	0.540815
1126	2.06	2.08	4.466	0.8327	0.8327	tr|E9PSJ4|E9PSJ4_RAT	Protein Spag9 OS=Rattus norvegicus GN=Spag9 PE=4 SV=1	1	1.03753	0.728528
1127	2.05	3.71	8.3	8.3	5.138	tr|G3V8C4|G3V8C4_RAT	Chloride intracellular channel 4, isoform CRA_b OS=Rattus norvegicus GN=Clic4 PE=4 SV=1	2	0.666807	0.413552
1128	2.05	2.77	5.052	0.8982	0.524	tr|F1LRI5|F1LRI5_RAT	Protein Gcn1l1 (Fragment) OS=Rattus norvegicus GN=Gcn1l1 PE=4 SV=1	2	0.816582	0.705125
1129	2.05	2.11	10.03	10.03	5.686	sp|P52847|ST1B1_RAT	Sulfotransferase family cytosolic 1B member 1 OS=Rattus norvegicus GN=Sult1b1 PE=1 SV=2	2	0.963829	0.934924
1130	2.05	2.05	19.21	10.17	3.955	tr|F1LRL8|F1LRL8_RAT	Protein Arpc3 (Fragment) OS=Rattus norvegicus GN=Arpc3 PE=4 SV=1	1	1	0.875552
1131	2.05	2.05	8.696	2.415	2.415	tr|Q6IMX3|Q6IMX3_RAT	Acetyl-Coenzyme A dehydrogenase, short chain, isoform CRA_a OS=Rattus norvegicus GN=Acads PE=2 SV=1	1	0.83946	0.581445
1132	2.04	6.04	8.307	3.408	3.408	tr|Q66HM2|Q66HM2_RAT	AP-2 complex subunit alpha-2 OS=Rattus norvegicus GN=Ap2a2 PE=1 SV=1	3	0.751623	0.58076
1133	2.04	3.43	8.647	5.543	4.435	tr|D3ZK05|D3ZK05_RAT	Gasdermin domain containing 1 (Predicted), isoform CRA_b OS=Rattus norvegicus GN=Gsdmd PE=4 SV=1	4	0.946237	0.918541
1134	2.04	2.79	11.78	4.14	4.14	tr|F1LLX4|F1LLX4_RAT	Protein Sqrdl (Fragment) OS=Rattus norvegicus GN=Sqrdl PE=4 SV=1	2	0.946237	0.844735
1135	2.04	2.49	3.298	1.499	1.285	tr|G3V6H2|G3V6H2_RAT	Pre-mRNA processing factor 8, isoform CRA_a OS=Rattus norvegicus GN=Prpf8 PE=4 SV=1	3	0.83946	0.74491
1136	2.04	2.08	7.556	5.466	3.859	tr|F1LZI4|F1LZI4_RAT	Protein Clint1 (Fragment) OS=Rattus norvegicus GN=Clint1 PE=4 SV=1	2	1.04713	0.921797
1137	2.04	2.07	4.348	4.348	2.795	sp|Q5XFW8|SEC13_RAT	Protein SEC13 homolog OS=Rattus norvegicus GN=Sec13 PE=1 SV=1	1	0.912011	0.839933
1138	2.04	2.06	7.407	2.881	2.881	tr|F1LVU8|F1LVU8_RAT	Protein Eif2a (Fragment) OS=Rattus norvegicus GN=Eif2a PE=4 SV=1	1	1.21339	0.637533
1139	2.04	2.04	9.45	2.539	2.539	sp|Q66H39|ABCF3_RAT	ATP-binding cassette sub-family F member 3 OS=Rattus norvegicus GN=Abcf3 PE=2 SV=1	1	0.809096	0.410209
1140	2.04	2.04	2.639	0.7038	0.7038	tr|D3ZF26|D3ZF26_RAT	Protein Tnks1bp1 OS=Rattus norvegicus GN=Tnks1bp1 PE=4 SV=1	1	1.00925	0.960823
1141	2.04	2.04	3.992	1.266	1.266	tr|F1LYY0|F1LYY0_RAT	Protein Sec24c (Fragment) OS=Rattus norvegicus GN=Sec24c PE=4 SV=1	1	0.49204	0.326179
1142	2.04	2.04	16.28	4.186	4.186	tr|F1LNT7|F1LNT7_RAT	Transcription factor A, mitochondrial (Fragment) OS=Rattus norvegicus GN=Tfam PE=4 SV=1	1	1.04713	0.917134
1143	2.03	3.96	6.098	4.634	4.634	sp|P63004|LIS1_RAT	Platelet-activating factor acetylhydrolase IB subunit alpha OS=Rattus norvegicus GN=Pafah1b1 PE=1 SV=2	2	0.794328	0.624796
1144	2.03	2.52	6.373	0.8338	0.536	sp|D3ZZL9|GCC2_RAT	GRIP and coiled-coil domain-containing protein 2 OS=Rattus norvegicus GN=Gcc2 PE=1 SV=1	1	1.24738	0.65748
1145	2.03	2.19	7.802	1.93	1.007	tr|F1LQB2|F1LQB2_RAT	Structural maintenance of chromosomes protein 3 OS=Rattus norvegicus GN=Smc3 PE=4 SV=1	1	0.724436	0.572279
1146	2.03	2.18	12.43	5.556	2.91	tr|D3ZA91|D3ZA91_RAT	Hsp90 co-chaperone Cdc37 OS=Rattus norvegicus GN=Cdc37 PE=4 SV=1	1	0.981748	0.976346
1147	2.03	2.05	11.8	3.217	3.217	tr|F1LPY7|F1LPY7_RAT	Trans-2-enoyl-CoA reductase, mitochondrial OS=Rattus norvegicus GN=Mecr PE=4 SV=1	1	0.937562	0.871159
1148	2.03	2.04	8.443	1.689	1.689	tr|D3ZLA3|D3ZLA3_RAT	Copine 3 protein OS=Rattus norvegicus GN=Cpne3 PE=2 SV=1	2	0.824138	0.712386
1149	2.03	2.03	3.163	0.8283	0.8283	tr|F1LPG9|F1LPG9_RAT	Protein Fam21c OS=Rattus norvegicus GN=Fam21c PE=4 SV=1	1	0.83946	0.716719
1150	2.03	2.03	15.42	12.44	4.975	sp|P40307|PSB2_RAT	Proteasome subunit beta type-2 OS=Rattus norvegicus GN=Psmb2 PE=1 SV=1	1	0.963829	0.939131
1151	2.03	2.03	8.273	4.317	4.317	tr|Q52KJ9|Q52KJ9_RAT	Protein Tmx1 OS=Rattus norvegicus GN=Tmx1 PE=2 SV=1	1	0.946237	0.83599
1152	2.02	4.42	9.78	8.383	5.389	sp|P13601|AL1A7_RAT	Aldehyde dehydrogenase, cytosolic 1 OS=Rattus norvegicus GN=Aldh1a7 PE=1 SV=2	3	0.337287	0.222476
1153	2.02	4.23	11.52	7.879	6.061	sp|P37397|CNN3_RAT	Calponin-3 OS=Rattus norvegicus GN=Cnn3 PE=1 SV=1	3	0.77983	0.65507
1154	2.02	2.92	8.732	3.326	3.326	tr|Q4QQS7|Q4QQS7_RAT	Protein Umps OS=Rattus norvegicus GN=Umps PE=2 SV=1	2	0.608135	0.4324
1155	2.02	2.91	10.49	2.703	2.703	tr|F1LMH6|F1LMH6_RAT	Cell surface glycoprotein MUC18 (Fragment) OS=Rattus norvegicus GN=Mcam PE=4 SV=1	2	1.19124	0.587732
1156	2.02	2.19	4.179	1.567	1.277	tr|D4ABN8|D4ABN8_RAT	Protein Xrn1 OS=Rattus norvegicus GN=Xrn1 PE=4 SV=1	1	0.625173	0.447939
1157	2.02	2.15	5.391	1.43	0.8801	tr|F1M6T9|F1M6T9_RAT	Protein Eif4g2 (Fragment) OS=Rattus norvegicus GN=Eif4g2 PE=4 SV=1	1	0.698232	0.537897
1158	2.02	2.14	6.496	0.8065	0.5824	tr|F1LPQ7|F1LPQ7_RAT	Golgin subfamily A member 4 OS=Rattus norvegicus GN=Golga4 PE=4 SV=1	1	1.0666	0.876792
1159	2.02	2.06	4.179	2.09	2.09	tr|D4A873|D4A873_RAT	Transmembrane 9 superfamily member 2 OS=Rattus norvegicus GN=Tm9sf2 PE=4 SV=1	1	0.691831	0.467545
1160	2.02	2.05	4.621	1.54	1.54	sp|B3DMA2|ACD11_RAT	Acyl-CoA dehydrogenase family member 11 OS=Rattus norvegicus GN=Acad11 PE=1 SV=1	1	1.09648	0.789042
1161	2.02	2.05	3.84	1.336	1.336	tr|F8WG57|F8WG57_RAT	Protein TBRG4 OS=Rattus norvegicus GN=Tbrg4 PE=4 SV=1	1	1.31826	0.563663
1162	2.02	2.04	5.355	1.397	1.397	tr|F1M3T4|F1M3T4_RAT	Anoctamin (Fragment) OS=Rattus norvegicus GN=Ano6 PE=3 SV=1	1	1.1272	0.801235
1163	2.02	2.04	18.25	11.11	11.11	tr|D4A269|D4A269_RAT	Uncharacterized protein OS=Rattus norvegicus PE=4 SV=1	2	1.07647	0.916175
1164	2.02	2.02	2.205	0.1613	0.1613	tr|F1MAN8|F1MAN8_RAT	Protein Lama5 OS=Rattus norvegicus GN=Lama5 PE=4 SV=1	1	0.831764	0.363989
1165	2.02	2.02	6.179	2.266	2.266	tr|D3ZPR0|D3ZPR0_RAT	Chromosome segregation 1-like (S. cerevisiae) (Predicted) OS=Rattus norvegicus GN=Cse1l PE=4 SV=1	2	0.672977	0.506651
1166	2.02	2.02	4.92	1.956	0.8892	sp|Q5QD51|AKA12_RAT	A-kinase anchor protein 12 OS=Rattus norvegicus GN=Akap12 PE=1 SV=1	2	1.22462	0.521919
1167	2.02	2.02	26.7	5.114	5.114	tr|F2Z3S4|F2Z3S4_RAT	60S ribosomal protein L11 (Fragment) OS=Rattus norvegicus GN=Rpl11 PE=3 SV=1	2	0.731139	0.534098
1168	2.02	2.02	10.36	4.202	2.241	tr|D4A3R9|D4A3R9_RAT	RNA-binding protein with serine-rich domain 1 OS=Rattus norvegicus GN=Rnps1 PE=4 SV=1	1	1.7378	0.386515
1169	2.02	2.02	3.316	0.8726	0.8726	sp|Q6MG49|BAG6_RAT	Large proline-rich protein BAG6 OS=Rattus norvegicus GN=Bag6 PE=2 SV=2	1	0.801678	0.632497
1170	2.02	2.02	6.776	1.869	1.869	sp|Q9Z1E1|FLOT1_RAT	Flotillin-1 OS=Rattus norvegicus GN=Flot1 PE=2 SV=2	1	0.711214	0.555764
1171	2.02	2.02	13.68	3.302	3.302	tr|B0BNE6|B0BNE6_RAT	NADH dehydrogenase (Ubiquinone) Fe-S protein 8 (Predicted), isoform CRA_a OS=Rattus norvegicus GN=Ndufs8 PE=2 SV=1	1	0.862979	0.790617
1172	2.02	2.02	6.403	2.448	2.448	sp|O54772|SMRD2_RAT	SWI/SNF-related matrix-associated actin-dependent regulator of chromatin subfamily D member 2 OS=Rattus norvegicus GN=Smarcd2 PE=2 SV=3	1	0.685488	0.522924
1173	2.02	2.02	2.639	1.274	1.274	tr|D4ACU9|D4ACU9_RAT	Integrin alpha 5 (Mapped) OS=Rattus norvegicus GN=Itga5 PE=3 SV=1	1	0.928966	0.857055
1174	2.02	2.02	5.81	3.058	3.058	tr|Q5PQK6|Q5PQK6_RAT	Nit1 protein OS=Rattus norvegicus GN=Nit1 PE=2 SV=1	1	0.954993	0.848799
1175	2.02	2.02	6.094	4.155	4.155	tr|D4AC36|D4AC36_RAT	Protein Eif3f OS=Rattus norvegicus GN=Eif3f PE=4 SV=1	1	1.04713	0.903127
1176	2.02	2.02	8.738	8.738	5.34	sp|Q5EB77|RAB18_RAT	Ras-related protein Rab-18 OS=Rattus norvegicus GN=Rab18 PE=2 SV=1	1	1.00925	0.964447
1177	2.01	21.49	31.94	27.78	27.78	tr|D3ZVX1|D3ZVX1_RAT	Uncharacterized protein OS=Rattus norvegicus PE=3 SV=1	25	1.08643	0.848321
1178	2.01	3.23	5.109	1.362	1.362	tr|G3V662|G3V662_RAT	Nuclear pore complex protein Nup153 OS=Rattus norvegicus GN=Nup153 PE=4 SV=1	2	0.912011	0.441474
1179	2.01	2.12	8.463	2.257	1.551	sp|Q925Q9|SH3K1_RAT	SH3 domain-containing kinase-binding protein 1 OS=Rattus norvegicus GN=Sh3kbp1 PE=1 SV=2	1	1.01859	0.95013
1180	2.01	2.08	1.645	0.6289	0.6289	tr|D4ACK1|D4ACK1_RAT	Protein Nup214 OS=Rattus norvegicus GN=Nup214 PE=4 SV=1	2	1.18032	0.797221
1181	2.01	2.06	23.33	15.56	5.556	sp|P36972|APT_RAT	Adenine phosphoribosyltransferase OS=Rattus norvegicus GN=Aprt PE=1 SV=1	1	1.02802	0.934122
1182	2.01	2.05	6.814	0.7366	0.7366	tr|D4A4J7|D4A4J7_RAT	Protein Smarcc1 OS=Rattus norvegicus GN=Smarcc1 PE=4 SV=1	1	1.01859	0.94507
1183	2.01	2.04	14.9	4.808	4.808	tr|Q8R2E7|Q8R2E7_RAT	FADD/MORT1 protein with death effector domain OS=Rattus norvegicus GN=Fadd PE=2 SV=1	2	0.597035	0.419533
1184	2.01	2.03	6.47	2.218	2.218	tr|Q68FZ8|Q68FZ8_RAT	Propionyl coenzyme A carboxylase, beta polypeptide OS=Rattus norvegicus GN=Pccb PE=2 SV=1	1	0.772681	0.643135
1185	2.01	2.02	8.567	2.247	2.247	tr|F1MAF2|F1MAF2_RAT	Protein Akap17a OS=Rattus norvegicus GN=Akap17a PE=4 SV=1	1	1.09648	0.838646
1186	2.01	2.02	5.047	1.367	1.367	tr|D3ZUM6|D3ZUM6_RAT	Serine/threonine-protein kinase N1 OS=Rattus norvegicus GN=Pkn1 PE=4 SV=1	1	1.11686	0.805253
1187	2.01	2.02	4.966	1.208	1.208	tr|D4AAN5|D4AAN5_RAT	Protein Brd4 OS=Rattus norvegicus GN=Brd4 PE=4 SV=1	1	0.711214	0.552037
1188	2.01	2.02	3.803	1.69	1.69	sp|P51574|S15A1_RAT	Solute carrier family 15 member 1 OS=Rattus norvegicus GN=Slc15a1 PE=2 SV=1	1	1.10662	0.826435
1189	2.01	2.01	6.122	1.531	1.531	tr|F1M024|F1M024_RAT	Protein Pdxdc1 (Fragment) OS=Rattus norvegicus GN=Pdxdc1 PE=3 SV=1	1	0.772681	0.285248
1190	2.01	2.01	8.824	2.757	2.757	tr|D3ZUT7|D3ZUT7_RAT	Translation initiation factor eIF-2B subunit delta OS=Rattus norvegicus GN=Eif2b4 PE=4 SV=1	2	0.912011	0.86626
1191	2.01	2.01	12.86	5.429	3.714	sp|Q5XIG0|NUDT9_RAT	ADP-ribose pyrophosphatase, mitochondrial OS=Rattus norvegicus GN=Nudt9 PE=2 SV=1	1	0.937562	0.915679
1192	2.01	2.01	6.549	1.559	1.559	sp|P0C1X8|AAK1_RAT	AP2-associated protein kinase 1 OS=Rattus norvegicus GN=Aak1 PE=1 SV=1	1	1.39316	0.547044
1193	2.01	2.01	5.352	1.189	1.189	tr|Q6P762|Q6P762_RAT	Mannosidase 2, alpha B1 OS=Rattus norvegicus GN=Man2b1 PE=2 SV=1	1	1.05682	0.875955
1194	2.01	2.01	7.368	1.654	1.654	sp|P53790|SC5A1_RAT	Sodium/glucose cotransporter 1 OS=Rattus norvegicus GN=Slc5a1 PE=2 SV=1	1	1.31826	0.600542
1195	2.01	2.01	15.77	6.923	4.231	tr|G3V978|G3V978_RAT	Protein Dhrs11 OS=Rattus norvegicus GN=Dhrs11 PE=3 SV=1	1	0.801678	0.687498
1196	2.01	2.01	8.766	3.578	3.578	sp|Q63135|CR1L_RAT	Complement component receptor 1-like protein OS=Rattus norvegicus GN=Cr1l PE=1 SV=1	1	0.937562	0.899596
1197	2.01	2.01	9.967	2.658	2.658	tr|Q66HP8|Q66HP8_RAT	Mitochondrial carnitine/acylcarnitine carrier protein OS=Rattus norvegicus GN=Slc25a20 PE=2 SV=1	1	0.77983	0.647504
1198	2.01	2.01	7.398	3.061	3.061	tr|Q5RKH2|Q5RKH2_RAT	Galactokinase 1 OS=Rattus norvegicus GN=Galk1 PE=2 SV=1	1	0.824138	0.613676
1199	2.01	2.01	3.917	1.836	1.836	sp|O35274|NEB2_RAT	Neurabin-2 OS=Rattus norvegicus GN=Ppp1r9b PE=1 SV=1	1	1.07647	0.861703
1200	2.01	2.01	7.022	3.933	3.933	tr|Q5M830|Q5M830_RAT	Protein Rfc3 OS=Rattus norvegicus GN=Rfc3 PE=2 SV=1	1	1.75388	0.3829
1201	2.01	2.01	15.33	7.333	7.333	tr|F1M7G3|F1M7G3_RAT	Ubiquitin-conjugating enzyme E2 D3 OS=Rattus norvegicus GN=Ube2d3 PE=3 SV=1	1	0.946237	0.530479
1202	2.01	2.01	9.692	3.524	3.524	tr|D3ZUX5|D3ZUX5_RAT	Coiled-coil-helix-coiled-coil-helix domain containing 3 (Predicted), isoform CRA_a OS=Rattus norvegicus GN=Chchd3 PE=4 SV=1	1	1.1272	0.650525
1203	2.01	2.01	2.074	1.124	1.124	sp|Q920H8|HEPH_RAT	Hephaestin OS=Rattus norvegicus GN=Heph PE=2 SV=1	1	0.787046	0.666391
1204	2.01	2.01	11.7	5.848	5.848	sp|Q6IUR5|NENF_RAT	Neudesin OS=Rattus norvegicus GN=Nenf PE=2 SV=1	1	1.25892	0.655202
1205	2.01	2.01	5.143	2.286	2.286	sp|Q5RJR2|TWF1_RAT	Twinfilin-1 OS=Rattus norvegicus GN=Twf1 PE=2 SV=1	1	0.409261	0.264527
1206	2.01	2.01	1.728	1.111	1.111	tr|Q6TUH3|Q6TUH3_RAT	LRRGT00071 OS=Rattus norvegicus GN=Usp40 PE=2 SV=1	1	1.10662	0.706786
1207	2.01	2.01	11.02	6.299	6.299	tr|Q6MGC4|Q6MGC4_RAT	H2-K region expressed gene 2, rat orthologue OS=Rattus norvegicus GN=Pfdn6 PE=2 SV=1	1	0.981748	0.635459
1208	2.01	2.01	13.33	13.33	5.833	tr|Q5PQZ9|Q5PQZ9_RAT	NADH dehydrogenase [ubiquinone] 1 subunit C2 OS=Rattus norvegicus GN=Ndufc2 PE=2 SV=1	1	1.0666	0.762938
1209	2.01	2.01	4	4	4	sp|Q68FY1|NUP53_RAT	Nucleoporin NUP53 OS=Rattus norvegicus GN=Nup35 PE=1 SV=1	1	1.08643	0.854362
1210	2	68.19	29.98	24.42	23.14	tr|F1M7T3|F1M7T3_RAT	Myosin-11 OS=Rattus norvegicus GN=Myh11 PE=4 SV=1	56	0.436516	0.421766
1211	2	25.08	31.85	30.73	30.73	sp|Q6AYZ1|TBA1C_RAT	Tubulin alpha-1C chain OS=Rattus norvegicus GN=Tuba1c PE=1 SV=1	18	1.0666	0.920385
1212	2	21.05	24.55	20.98	20.98	sp|Q5XIF6|TBA4A_RAT	Tubulin alpha-4A chain OS=Rattus norvegicus GN=Tuba4a PE=2 SV=1	16	1.03753	0.930726
1213	2	20.91	35.35	31.99	26.62	tr|Q4QQV0|Q4QQV0_RAT	Protein Tubb6 OS=Rattus norvegicus GN=Tubb6 PE=2 SV=1	16	1.95885	0.331458
1214	2	16.81	43.6	43.6	43.6	sp|P13832|MRLCA_RAT	Myosin regulatory light chain RLC-A OS=Rattus norvegicus GN=Rlc-a PE=2 SV=2	16	1.22462	0.68398
1215	2	8	22.39	22.39	22.39	tr|G3V6H0|G3V6H0_RAT	Protein LOC100363782 OS=Rattus norvegicus GN=Rab1b PE=3 SV=1	4	0.619441	0.424356
1216	2	6.96	12.68	7.143	6.071	tr|D3ZXQ0|D3ZXQ0_RAT	Protein Ces2g OS=Rattus norvegicus GN=Ces2g PE=4 SV=1	3	0.903649	0.832438
1217	2	6.84	9.857	5.914	4.839	tr|Q8K3R0|Q8K3R0_RAT	Carboxylesterase isoenzyme OS=Rattus norvegicus GN=Ces2a PE=2 SV=1	3
1218	2	6.7	18.15	18.15	18.15	tr|G3V9F0|G3V9F0_RAT	Protein Mcpt9 OS=Rattus norvegicus GN=Mcpt9 PE=3 SV=1	5	1.0666	0.882457
1219	2	5.43	8.949	8.949	8.949	sp|P50398|GDIA_RAT	Rab GDP dissociation inhibitor alpha OS=Rattus norvegicus GN=Gdi1 PE=1 SV=1	4	0.737904	0.517398
1220	2	4.09	9.605	5.367	5.367	sp|P08753|GNAI3_RAT	Guanine nucleotide-binding protein G(k) subunit alpha OS=Rattus norvegicus GN=Gnai3 PE=1 SV=3	2	1.04713	0.905141
1221	2	4.05	5.915	2.066	2.066	sp|Q6MG21|SYVM_RAT	Valine--tRNA ligase, mitochondrial OS=Rattus norvegicus GN=Vars2 PE=2 SV=1	2	1.43219	0.516606
1222	2	4	9.838	3.377	3.377	tr|Q6TXG7|Q6TXG7_RAT	Serine hydroxymethyltransferase OS=Rattus norvegicus GN=Shmt1 PE=2 SV=1	2	1.48594	0.488605
1223	2	4	19.03	8.582	8.582	tr|F8WFV0|F8WFV0_RAT	Protein Sfrs5 OS=Rattus norvegicus GN=Srsf5 PE=4 SV=1	3	0.946237	0.937433
1224	2	4	11.18	7.453	7.453	tr|Q6P7Q6|Q6P7Q6_RAT	Galectin-9 OS=Rattus norvegicus GN=Lgals9 PE=2 SV=1	2	0.679204	0.508206
1225	2	4	15.96	13.15	13.15	tr|B5DEP2|B5DEP2_RAT	Protein Rab25 OS=Rattus norvegicus GN=Rab25 PE=2 SV=1	2	0.937562	0.908542
1226	2	3.91	10.1	3.919	3.325	sp|Q62774|MYO1A_RAT	Unconventional myosin-Ia (Fragment) OS=Rattus norvegicus GN=Myo1a PE=2 SV=1	2	0.613762	0.43338
1227	2	3.7	5.979	2.541	2.541	sp|Q925G1|HDGR2_RAT	Hepatoma-derived growth factor-related protein 2 OS=Rattus norvegicus GN=Hdgfrp2 PE=1 SV=2	2	1.7378	0.385486
1228	2	3.7	11.39	11.39	11.39	sp|Q923W4|HDGR3_RAT	Hepatoma-derived growth factor-related protein 3 OS=Rattus norvegicus GN=Hdgfrp3 PE=2 SV=1	2	1.2942	0.619073
1229	2	3.64	8.108	5.676	4.324	sp|Q99PD4|ARC1A_RAT	Actin-related protein 2/3 complex subunit 1A OS=Rattus norvegicus GN=Arpc1a PE=2 SV=1	2	1.04713	0.908876
1230	2	3.55	7.373	7.373	7.373	sp|Q5XIU9|PGRC2_RAT	Membrane-associated progesterone receptor component 2 OS=Rattus norvegicus GN=Pgrmc2 PE=1 SV=1	2	1.19124	0.724012
1231	2	2.86	3.542	1.55	0.9408	tr|F1M8X9|F1M8X9_RAT	Protein Gbf1 (Fragment) OS=Rattus norvegicus GN=Gbf1 PE=4 SV=1	1	0.981748	0.988522
1232	2	2.51	11.66	11.66	7.975	tr|D4AB01|D4AB01_RAT	Histidine triad nucleotide binding protein 2 (Predicted), isoform CRA_a OS=Rattus norvegicus GN=Hint2 PE=4 SV=1	1	0.855067	0.818477
1233	2	2.5	7.113	7.113	5.021	tr|F1M7G8|F1M7G8_RAT	Protein Cdx2 (Fragment) OS=Rattus norvegicus GN=Cdx2 PE=3 SV=1	1	1.00925	0.863681
1234	2	2.29	4.156	3.652	2.141	tr|G3V7U9|G3V7U9_RAT	Glucocorticoid receptor OS=Rattus norvegicus GN=Nr3c1 PE=3 SV=1	1	0.847227	0.757381
1235	2	2.27	5.625	1.964	0.9821	tr|D3ZQ23|D3ZQ23_RAT	ELKS/Rab6-interacting/CAST family member 1 OS=Rattus norvegicus GN=Erc1 PE=4 SV=1	1	0.724436	0.567848
1236	2	2.18	5.572	3.074	2.594	tr|D3ZUT9|D3ZUT9_RAT	Protein Ints3 OS=Rattus norvegicus GN=Ints3 PE=4 SV=1	1	1	0.988536
1237	2	2.17	5.75	2.047	1.657	tr|B2GV09|B2GV09_RAT	Llgl2 protein OS=Rattus norvegicus GN=Llgl2 PE=2 SV=1	1	0.698232	0.533679
1238	2	2.15	16.67	16.67	11.46	tr|F1LW26|F1LW26_RAT	Uncharacterized protein (Fragment) OS=Rattus norvegicus PE=4 SV=1	1	1.05682	0.889607
1239	2	2.15	4.605	4.605	3.289	tr|E2RUH2|E2RUH2_RAT	Protein LOC100360501 OS=Rattus norvegicus GN=LOC100360501 PE=2 SV=1	1	1.07647	0.861432
1240	2	2.14	8.812	5.747	5.747	tr|F8WG42|F8WG42_RAT	Eukaryotic translation initiation factor 3 subunit J (Fragment) OS=Rattus norvegicus GN=Eif3j PE=4 SV=1	2	1.28233	0.859365
1241	2	2.11	17.78	10.37	10.37	tr|F1M1T3|F1M1T3_RAT	Peptidyl-prolyl cis-trans isomerase (Fragment) OS=Rattus norvegicus GN=Fkbp1a PE=4 SV=1	1	1.23595	0.666426
1242	2	2.07	7.555	0.8946	0.8946	sp|Q63357|MYO1D_RAT	Unconventional myosin-Id OS=Rattus norvegicus GN=Myo1d PE=1 SV=3	1	0.296483	0.200033
1243	2	2.06	3.021	1.007	1.007	tr|D4A994|D4A994_RAT	Protein RGD1310427 OS=Rattus norvegicus GN=Emc1 PE=4 SV=1	1	0.912011	0.946116
1244	2	2.06	5.307	2.653	1.824	sp|P61765-2|STXB1_RAT	Isoform 2 of Syntaxin-binding protein 1 OS=Rattus norvegicus GN=Stxbp1	1	1.49969	0.479472
1245	2	2.05	7.554	2.878	2.878	tr|D3ZHP2|D3ZHP2_RAT	Serine/threonine-protein phosphatase OS=Rattus norvegicus GN=Ppp2cb PE=3 SV=1	1	0.539511	0.365674
1246	2	2.04	5.417	1.634	1.118	tr|F1LQN3|F1LQN3_RAT	Reticulon-4 OS=Rattus norvegicus GN=Rtn4 PE=4 SV=1	1	1.07647	0.882945
1247	2	2.04	3.984	1.328	1.328	tr|G8JLR6|G8JLR6_RAT	Meprin A subunit alpha (Fragment) OS=Rattus norvegicus GN=Mep1a PE=3 SV=1	1	1.20226	0.713768
1248	2	2.04	4.412	2.941	2.941	tr|B4F786|B4F786_RAT	CD2 antigen (Cytoplasmic tail) binding protein 2 (Predicted), isoform CRA_a OS=Rattus norvegicus GN=Cd2bp2 PE=2 SV=1	1	1.22462	0.687466
1249	2	2.03	3.2	1.143	1.143	sp|P97675|ENPP3_RAT	Ectonucleotide pyrophosphatase/phosphodiesterase family member 3 OS=Rattus norvegicus GN=Enpp3 PE=1 SV=2	1	1.24738	0.663611
1250	2	2.03	5.989	2.541	2.541	tr|D3ZPL1|D3ZPL1_RAT	Protein Cpsf6 OS=Rattus norvegicus GN=Cpsf6 PE=4 SV=1	1	0.981748	0.991283
1251	2	2.03	17.59	8.333	8.333	sp|P21571|ATP5J_RAT	ATP synthase-coupling factor 6, mitochondrial OS=Rattus norvegicus GN=Atp5j PE=1 SV=1	1	1.28233	0.493398
1252	2	2.03	18.48	18.48	13.04	tr|D4AAS3|D4AAS3_RAT	Protein LOC100361838 OS=Rattus norvegicus GN=LOC100361838 PE=4 SV=1	1	0.816582	0.711203
1253	2	2.02	5.503	1.887	1.887	tr|Q3KRC3|Q3KRC3_RAT	Protein Srpr OS=Rattus norvegicus GN=Srpr PE=2 SV=1	1	0.937562	0.903468
1254	2	2.02	6.998	2.026	2.026	tr|F1M1B0|F1M1B0_RAT	Protein LOC100366224 (Fragment) OS=Rattus norvegicus GN=LOC100366224 PE=4 SV=1	1	0.801678	0.683694
1255	2	2.02	8.577	2.92	2.92	tr|D3ZGX7|D3ZGX7_RAT	Protein LYRIC OS=Rattus norvegicus GN=Mtdh PE=4 SV=1	1	1.13763	0.788905
1256	2	2.02	5.348	2.674	2.674	tr|Q6AYF8|Q6AYF8_RAT	Protein Serpinb9 OS=Rattus norvegicus GN=Serpinb9 PE=2 SV=1	1	0.724436	0.57497
1257	2	2.02	14.29	5.831	5.831	sp|P29147|BDH_RAT	D-beta-hydroxybutyrate dehydrogenase, mitochondrial OS=Rattus norvegicus GN=Bdh1 PE=1 SV=2	1	0.717794	0.558898
1258	2	2.02	4.684	2.648	2.648	tr|Q68FT8|Q68FT8_RAT	Protein Serpinf2 OS=Rattus norvegicus GN=Serpinf2 PE=2 SV=1	1	0.879022	0.806034
1259	2	2.02	5.263	2.757	2.757	tr|F1MAK5|F1MAK5_RAT	Protein Ddi2 OS=Rattus norvegicus GN=Ddi2 PE=4 SV=1	1	1.00925	0.97114
1260	2	2.02	6.909	3.273	3.273	tr|D3ZRJ2|D3ZRJ2_RAT	Syntaxin-17 OS=Rattus norvegicus GN=Stx17 PE=4 SV=1	1	0.954993	0.935164
1261	2	2.02	5.532	3.404	3.404	tr|O55158|O55158_RAT	D6.1A protein OS=Rattus norvegicus GN=Tspan8 PE=2 SV=2	1	0.912011	0.870249
1262	2	2.02	6.897	4.981	4.981	sp|O70257|STX7_RAT	Syntaxin-7 OS=Rattus norvegicus GN=Stx7 PE=1 SV=4	1	1.05682	0.893884
1263	2	2.01	10.01	2.086	2.086	tr|Q6AYN8|Q6AYN8_RAT	Minichromosome maintenance deficient 7 (S. cerevisiae) OS=Rattus norvegicus GN=Mcm7 PE=2 SV=1	1	0.879022	0.811644
1264	2	2.01	8.532	1.984	1.984	sp|Q9R0T3|DNJC3_RAT	DnaJ homolog subfamily C member 3 OS=Rattus norvegicus GN=Dnajc3 PE=2 SV=3	1	0.564937	0.389446
1265	2	2.01	3.616	1.101	0.7075	tr|Q9JK64|Q9JK64_RAT	Multidrug resistance protein 1a OS=Rattus norvegicus GN=Abcb1a PE=2 SV=1	1	1.58489	0.445004
1266	2	2.01	13.9	3.39	3.39	tr|Q6AZ33|Q6AZ33_RAT	Biliverdin reductase A OS=Rattus norvegicus GN=Blvra PE=2 SV=1	1	1.33045	0.586254
1267	2	2.01	10.87	2.446	2.446	tr|G3V9X8|G3V9X8_RAT	Magnesium transporter protein 1 OS=Rattus norvegicus GN=Magt1 PE=4 SV=1	1	0.613762	0.437072
1268	2	2.01	6.815	2.963	1.778	tr|B4F7E7|B4F7E7_RAT	Membrane protein, palmitoylated 5 (MAGUK p55 subfamily member 5) OS=Rattus norvegicus GN=Mpp5 PE=2 SV=1	1	1.47231	0.496068
1269	2	2.01	4.154	1.187	1.187	tr|Q99MA2|Q99MA2_RAT	Membrane-bound aminopeptidase P OS=Rattus norvegicus GN=Xpnpep2 PE=2 SV=1	1	0.83946	0.746104
1270	2	2.01	7.538	2.261	2.261	tr|G3V9E1|G3V9E1_RAT	Protein kinase, cAMP dependent, catalytic, beta (Predicted), isoform CRA_d OS=Rattus norvegicus GN=Prkacb PE=4 SV=1	1	0.608135	0.430322
1271	2	2.01	6.601	3.423	3.423	sp|Q4V892|SIGIR_RAT	Single Ig IL-1-related receptor OS=Rattus norvegicus GN=Sigirr PE=2 SV=1	1	0.903649	0.855482
1272	2	2.01	11.06	4.02	4.02	sp|O35543|HPGDS_RAT	Hematopoietic prostaglandin D synthase OS=Rattus norvegicus GN=Hpgds PE=1 SV=3	1	3.59749	0.187746
1273	2	2.01	3.096	1.548	1.548	tr|Q4KM08|Q4KM08_RAT	ATP-binding cassette, sub-family G (WHITE), member 3-like 1 OS=Rattus norvegicus GN=Abcg3l1 PE=2 SV=1	1	0.77983	0.648402
1274	2	2.01	22.08	15.58	15.58	tr|D3ZYK6|D3ZYK6_RAT	Hematological and neurological-expressed 1 protein OS=Rattus norvegicus GN=Hn1 PE=4 SV=1	1	1.14815	0.77498
1275	2	2.01	5.365	3.219	3.219	tr|B2GV94|B2GV94_RAT	Fam134c protein OS=Rattus norvegicus GN=Fam134c PE=2 SV=1	1	1.33045	0.590186
1276	2	2.01	7.914	5.036	5.036	sp|Q6AY20|MPRD_RAT	Cation-dependent mannose-6-phosphate receptor OS=Rattus norvegicus GN=M6pr PE=2 SV=1	1	0.879022	0.810188
1277	2	2.01	3.502	2.724	2.724	tr|F1M7Z1|F1M7Z1_RAT	Uncharacterized protein (Fragment) OS=Rattus norvegicus PE=4 SV=1	1	0.912011	0.868506
1278	2	2.01	4.895	3.497	3.497	sp|Q5RKJ2|CYBR1_RAT	Cytochrome b reductase 1 OS=Rattus norvegicus GN=Cybrd1 PE=2 SV=1	1	0.737904	0.586395
1279	2	2	8	1.684	1.684	tr|F8WFH8|F8WFH8_RAT	Tryptophan--tRNA ligase, cytoplasmic OS=Rattus norvegicus GN=Wars PE=3 SV=1	1	0.717794	0.562395
1280	2	2	9.397	2.128	2.128	tr|F1LNX5|F1LNX5_RAT	Beta-catenin-like protein 1 OS=Rattus norvegicus GN=Ctnnbl1 PE=4 SV=1	1
1281	2	2	15.14	3.143	3.143	sp|Q5XIG8|STRAP_RAT	Serine-threonine kinase receptor-associated protein OS=Rattus norvegicus GN=Strap PE=1 SV=1	1	1.10662	0.846332
1282	2	2	11.23	3.836	3.836	tr|Q6AYF2|Q6AYF2_RAT	LIM and cysteine-rich domains 1 OS=Rattus norvegicus GN=Lmcd1 PE=2 SV=1	1	0.711214	0.554774
1283	2	2	4.396	1.319	1.319	tr|D3ZFF3|D3ZFF3_RAT	Protein Itih1 OS=Rattus norvegicus GN=Itih1 PE=4 SV=1	1	0.895365	0.835354
1284	2	2	5.354	3.282	3.282	tr|G3V8S2|G3V8S2_RAT	SHC-transforming protein 1 OS=Rattus norvegicus GN=Shc1 PE=4 SV=1	1
1285	2	2	8.725	2.349	2.349	tr|F1LQD6|F1LQD6_RAT	Non-muscle caldesmon (Fragment) OS=Rattus norvegicus GN=Cald1 PE=4 SV=1	1	1.02802	0.938989
1286	2	2	15.07	9.559	3.309	tr|E9PTV2|E9PTV2_RAT	Syntaxin-12 OS=Rattus norvegicus GN=Stx12 PE=3 SV=1	2	1.41906	0.568346
1287	2	2	5.753	2.538	2.538	tr|D4A3E1|D4A3E1_RAT	Protein Hnrpll OS=Rattus norvegicus GN=Hnrpll PE=4 SV=1	1	0.679204	0.509095
1288	2	2	4.698	2.685	2.685	tr|D4A0U1|D4A0U1_RAT	Protein Ythdf3 OS=Rattus norvegicus GN=Ythdf3 PE=4 SV=1	1	1.28233	0.629204
1289	2	2	7.544	1.124	1.124	sp|Q9JMH2|LRIT1_RAT	Leucine-rich repeat, immunoglobulin-like domain and transmembrane domain-containing protein 1 OS=Rattus norvegicus GN=Lrit1 PE=1 SV=2	1	1	0.98935
1290	2	2	11.65	2.331	2.331	sp|Q6IRK9|CBPQ_RAT	Carboxypeptidase Q OS=Rattus norvegicus GN=Cpq PE=1 SV=1	1	0.912011	0.87019
1291	2	2	13.99	5.245	5.245	tr|Q5M849|Q5M849_RAT	Interferon-induced protein 35 OS=Rattus norvegicus GN=Ifi35 PE=2 SV=1	1	0.564937	0.38852
1292	2	2	17.39	7.826	7.826	tr|F1M3V7|F1M3V7_RAT	Protein RGD1562415 (Fragment) OS=Rattus norvegicus GN=RGD1562415 PE=4 SV=1	1	0.765597	0.638459
1293	2	2	4.097	1.669	1.669	tr|F1LX16|F1LX16_RAT	Uncharacterized protein (Fragment) OS=Rattus norvegicus PE=4 SV=1	1	0.625173	0.450224
1294	2	2	6.371	2.77	2.77	tr|F1LRK4|F1LRK4_RAT	Protein Grsf1 (Fragment) OS=Rattus norvegicus GN=Grsf1 PE=4 SV=1	1	0.990832	0.973458
1295	2	2	8.171	2.529	2.529	tr|D3ZNF4|D3ZNF4_RAT	Protein Tbl1xr1 OS=Rattus norvegicus GN=Tbl1xr1 PE=4 SV=1	1	1.22462	0.6891
1296	2	2	9.512	5.854	4.634	tr|D3ZMC2|D3ZMC2_RAT	Beta-arrestin-1 OS=Rattus norvegicus GN=Arrb1 PE=4 SV=1	1	0.887156	0.831748
1297	2	2	4.727	3.091	1.818	tr|D3ZGK7|D3ZGK7_RAT	Uncharacterized protein OS=Rattus norvegicus PE=4 SV=1	1	1	0.982628
1298	2	2	7.485	2.994	2.994	tr|D3ZA66|D3ZA66_RAT	Protein Pstpip2 OS=Rattus norvegicus GN=Pstpip2 PE=4 SV=1	1	0.758578	0.620797
1299	2	2	3.89	1.783	1.783	tr|B1H282|B1H282_RAT	Glycosyltransferase 25 domain containing 1 OS=Rattus norvegicus GN=Glt25d1 PE=2 SV=1	1	1.47231	0.494594
1300	2	2	21.23	7.263	7.263	sp|P84817-2|FIS1_RAT	Isoform 2 of Mitochondrial fission 1 protein OS=Rattus norvegicus GN=Fis1	1	0.946237	0.937459
1301	2	2	11.27	3.273	3.273	sp|P20974|NAR2B_RAT	T-cell ecto-ADP-ribosyltransferase 2 OS=Rattus norvegicus GN=Art2b PE=1 SV=2	1	0.731139	0.579351
1302	2	2	7.022	2.809	2.809	sp|D4AD37|IMPA3_RAT	Inositol monophosphatase 3 OS=Rattus norvegicus GN=Impad1 PE=3 SV=1	1	0.895365	0.833754
1303	2	2	14.29	6.044	6.044	tr|Q66HI5|Q66HI5_RAT	Ferritin OS=Rattus norvegicus GN=Fth1 PE=2 SV=2	1	0.847227	0.75857
1304	2	2	38.06	12.69	12.69	tr|F1LRP6|F1LRP6_RAT	Vesicle-associated membrane protein 2 (Fragment) OS=Rattus norvegicus GN=Vamp2 PE=4 SV=1	1	1.08643	0.785487
1305	2	2	6.25	2.344	2.344	tr|D4AE56|D4AE56_RAT	Prostaglandin E synthase 2 (Predicted), isoform CRA_b OS=Rattus norvegicus GN=Ptges2 PE=4 SV=1	1	1.44544	0.5096
1306	2	2	6.327	1.837	1.837	tr|D4ABY2|D4ABY2_RAT	Uncharacterized protein OS=Rattus norvegicus GN=Copg2 PE=4 SV=1	1	0.990832	0.993195
1307	2	2	15.52	6.034	6.034	tr|D4ABV4|D4ABV4_RAT	Protein Rab5c OS=Rattus norvegicus GN=Rab5c PE=3 SV=1	1	0.711214	0.55042
1308	2	2	9.048	5.238	5.238	tr|D4A075|D4A075_RAT	60S ribosomal protein L13 OS=Rattus norvegicus GN=LOC100361259 PE=3 SV=1	1	1.34276	0.581394
1309	2	2	4.68	2.709	2.709	tr|B5DEY8|B5DEY8_RAT	Protein Snx6 OS=Rattus norvegicus GN=Snx6 PE=2 SV=1	1	1.52757	0.47065
1310	2	2	5.828	2.454	2.454	tr|B5DEK0|B5DEK0_RAT	Protein Rprd1b OS=Rattus norvegicus GN=Rprd1b PE=2 SV=1	1	1.01859	0.961609
1311	2	2	7.725	3.863	3.863	sp|Q923M1|MSRA_RAT	Mitochondrial peptide methionine sulfoxide reductase OS=Rattus norvegicus GN=Msra PE=1 SV=1	1	0.990832	0.687172
1312	2	2	11.97	8.451	8.451	sp|Q75Q41|TOM22_RAT	Mitochondrial import receptor subunit TOM22 homolog OS=Rattus norvegicus GN=Tomm22 PE=1 SV=1	1	0.469894	0.30776
1313	2	2	9.816	4.294	4.294	sp|Q6PEC4|SKP1_RAT	S-phase kinase-associated protein 1 OS=Rattus norvegicus GN=Skp1 PE=2 SV=3	1	1.55597	0.457479
1314	2	2	4.824	1.67	1.67	sp|Q64057|AL7A1_RAT	Alpha-aminoadipic semialdehyde dehydrogenase OS=Rattus norvegicus GN=Aldh7a1 PE=1 SV=2	1	0.972747	0.971819
1315	2	2	8.421	4.211	4.211	sp|Q5PQN7|LZIC_RAT	Protein LZIC OS=Rattus norvegicus GN=Lzic PE=2 SV=1	1	1.21339	0.691048
1316	2	2	5.629	2.649	2.649	sp|Q499V8|SARG_RAT	Specifically androgen-regulated gene protein OS=Rattus norvegicus GN=Sarg PE=2 SV=2	1	1.08643	0.924772
1317	2	2	7.28	3.831	3.831	sp|O88794|PNPO_RAT	Pyridoxine-5'-phosphate oxidase OS=Rattus norvegicus GN=Pnpo PE=1 SV=1	1	0.465586	0.303426
1318	2	2	10.7	8.856	5.535	sp|B2RYG6|OTUB1_RAT	Ubiquitin thioesterase OTUB1 OS=Rattus norvegicus GN=Otub1 PE=1 SV=1	1	1.0666	0.882438
1319	2	2	14.29	10	6.19	sp|B0BNE2|RPAB1_RAT	DNA-directed RNA polymerases I, II, and III subunit RPABC1 OS=Rattus norvegicus GN=Polr2e PE=2 SV=1	1	0.801678	0.679118
1320	2	2	10.76	7.595	7.595	tr|Q331S7|Q331S7_RAT	Protein Dbndd2 OS=Rattus norvegicus GN=Dbndd2 PE=2 SV=1	1	2.99226	0.216458
1321	2	2	6.918	5.346	5.346	tr|Q05BA4|Q05BA4_RAT	Myadm protein OS=Rattus norvegicus GN=Myadm PE=2 SV=1	2	1.28233	0.634409
1322	2	2	4.737	3.158	3.158	tr|O88321|O88321_RAT	Antisecretory factor OS=Rattus norvegicus GN=Psmd4 PE=2 SV=1	2	0.928966	0.897528
1323	2	2	12.57	6.806	6.806	tr|G3V7W1|G3V7W1_RAT	Programmed cell death 6 (Predicted), isoform CRA_a OS=Rattus norvegicus GN=Pdcd6 PE=4 SV=1	1	0.83946	0.748872
1324	2	2	9.73	5.405	5.405	tr|F1M6P1|F1M6P1_RAT	Vacuolar protein sorting-associated protein 29 (Fragment) OS=Rattus norvegicus GN=Vps29 PE=4 SV=1	1	1.14815	0.761922
1325	2	2	12.67	8.667	8.667	tr|F1M5V2|F1M5V2_RAT	Protein Glipr2 (Fragment) OS=Rattus norvegicus GN=Glipr2 PE=4 SV=1	1	1.85353	0.356993
1326	2	2	3.19	1.84	1.84	tr|F1LQF0|F1LQF0_RAT	ATP-binding cassette sub-family F member 1 (Fragment) OS=Rattus norvegicus GN=Abcf1 PE=3 SV=1	1	0.824138	0.725629
1327	2	2	16.83	8.911	8.911	tr|F1LNT8|F1LNT8_RAT	Vesicle-associated membrane protein 8 (Fragment) OS=Rattus norvegicus GN=Vamp8 PE=4 SV=1	1	1.65959	0.411105
1328	2	2	2.444	1.692	1.692	tr|D4A777|D4A777_RAT	Protein Fam114a1 OS=Rattus norvegicus GN=Fam114a1 PE=4 SV=1	1	1.13763	0.779159
1329	2	2	2.618	1.995	1.995	tr|D3ZYK4|D3ZYK4_RAT	Uncharacterized protein OS=Rattus norvegicus PE=4 SV=1	1	0.465586	0.30301
1330	2	2	5.629	3.642	3.642	tr|D3ZW98|D3ZW98_RAT	Thioredoxin-like protein 1 OS=Rattus norvegicus GN=Txnl1 PE=4 SV=1	1	0.758578	0.615899
1331	2	2	8.065	4.839	4.839	tr|B2RYS8|B2RYS8_RAT	NADH dehydrogenase (Ubiquinone) 1 beta subcomplex 8 OS=Rattus norvegicus GN=Ndufb8 PE=2 SV=1	1	0.963829	0.978029
1332	2	2	4.545	3.333	3.333	sp|Q5FWY5|AIP_RAT	AH receptor-interacting protein OS=Rattus norvegicus GN=Aip PE=1 SV=1	1	0.887156	0.835306
1333	2	2	7.048	7.048	3.965	sp|Q4KM65|CPSF5_RAT	Cleavage and polyadenylation specificity factor subunit 5 OS=Rattus norvegicus GN=Nudt21 PE=2 SV=1	1	1.07647	0.868981
1334	2	2	3.627	2.332	2.332	sp|Q4FZT2|PPME1_RAT	Protein phosphatase methylesterase 1 OS=Rattus norvegicus GN=Ppme1 PE=1 SV=2	1	0.847227	0.75865
1335	2	2	11.21	6.542	6.542	sp|Q03344|ATIF1_RAT	ATPase inhibitor, mitochondrial OS=Rattus norvegicus GN=Atpif1 PE=2 SV=2	1	1.2942	0.604709
1336	2	2	18.92	14.41	14.41	sp|P10818|CX6A1_RAT	Cytochrome c oxidase subunit 6A1, mitochondrial OS=Rattus norvegicus GN=Cox6a1 PE=1 SV=2	2	1.00925	0.925306
1337	2	2	13.04	8.696	8.696	sp|P01355|CCKN_RAT	Cholecystokinin OS=Rattus norvegicus GN=Cck PE=1 SV=1	1	0.465586	0.304046
1338	2	2	5.405	3.904	3.904	sp|P00786|CATH_RAT	Pro-cathepsin H OS=Rattus norvegicus GN=Ctsh PE=1 SV=1	1	0.809096	0.701409
1339	2	2	5.364	5.364	5.364	tr|Q8SEZ2|Q8SEZ2_RAT	Cytochrome c oxidase subunit 3 (Fragment) OS=Rattus norvegicus GN=Mt-co3 PE=3 SV=1	3	0.816582	0.703135
1340	2	2	3.833	3.833	3.833	tr|Q4V7D1|Q4V7D1_RAT	Signal sequence receptor, alpha OS=Rattus norvegicus GN=Ssr1 PE=2 SV=1	1	1.01859	0.99806
1341	2	2	4.787	4.787	4.787	tr|G3V7L0|G3V7L0_RAT	Adrenodoxin, mitochondrial OS=Rattus norvegicus GN=Fdx1 PE=4 SV=1	1	1.11686	0.63776
1342	2	2	22.22	22.22	22.22	tr|G3V6P8|G3V6P8_RAT	Guanine nucleotide-binding protein subunit gamma OS=Rattus norvegicus GN=Gng12 PE=3 SV=1	1	1.44544	0.50978
1343	2	2	4.444	4.444	4.444	tr|G3V6P5|G3V6P5_RAT	Glucagon OS=Rattus norvegicus GN=Gcg PE=4 SV=1	1	1.88799	0.34615
1344	2	2	7.914	7.914	7.914	tr|F8WG89|F8WG89_RAT	Parathymosin (Fragment) OS=Rattus norvegicus GN=Ptms PE=4 SV=1	1	1.10662	0.773097
1345	2	2	6.977	6.977	6.977	tr|F1M3Q1|F1M3Q1_RAT	Protein Ifitm1 (Fragment) OS=Rattus norvegicus GN=Ifitm1 PE=4 SV=1	1	0.963829	0.9529
1346	2	2	12.77	12.77	12.77	tr|F1M2K3|F1M2K3_RAT	Uncharacterized protein (Fragment) OS=Rattus norvegicus PE=4 SV=1	1	1.33045	0.588781
1347	2	2	7.5	7.5	7.5	tr|F1M0Y9|F1M0Y9_RAT	Group XVI phospholipase A1/A2 (Fragment) OS=Rattus norvegicus GN=Pla2g16 PE=4 SV=1	1	1.25892	0.646467
1348	2	2	7.627	7.627	7.627	tr|F1LZI0|F1LZI0_RAT	Uncharacterized protein (Fragment) OS=Rattus norvegicus PE=4 SV=1	1	1.35519	0.574646
1349	2	2	5.298	5.298	5.298	tr|E9PU07|E9PU07_RAT	Protein LOC100361909 OS=Rattus norvegicus GN=LOC100361909 PE=3 SV=1	1	0.855067	0.770812
1350	2	2	3.647	3.647	3.647	tr|E9PSZ6|E9PSZ6_RAT	Protein Scamp2 OS=Rattus norvegicus GN=Scamp2 PE=4 SV=1	1	1.34276	0.567978
1351	2	2	11.76	11.76	11.76	tr|D4A7U6|D4A7U6_RAT	LSM3 homolog, U6 small nuclear RNA associated (S. cerevisiae) (Predicted) OS=Rattus norvegicus GN=Lsm3 PE=4 SV=1	1	1.02802	0.988624
1352	2	2	7.5	7.5	7.5	tr|D3ZYX8|D3ZYX8_RAT	Cytochrome c oxidase subunit VIIa polypeptide 2 like (Predicted), isoform CRA_e OS=Rattus norvegicus GN=Cox7a2l PE=4 SV=1	1	0.824138	0.65419
1353	2	2	11.11	11.11	11.11	tr|D3ZSL2|D3ZSL2_RAT	Protein LOC685045 OS=Rattus norvegicus GN=LOC685045 PE=4 SV=1	1	1.33045	0.570166
1354	2	2	11.5	11.5	11.5	tr|D3ZHI6|D3ZHI6_RAT	Protein Ctla2a OS=Rattus norvegicus GN=Ctla2a PE=4 SV=1	1	0.704693	0.548893
1355	2	2	12.82	12.82	12.82	tr|D3ZF11|D3ZF11_RAT	Hepatitis B virus x interacting protein (Predicted), isoform CRA_a OS=Rattus norvegicus GN=Lamtor5 PE=4 SV=1	1	1.07647	0.862988
1356	2	2	5.696	5.696	5.696	tr|B5DFI3|B5DFI3_RAT	Adaptor protein complex AP-1, sigma 1 (Predicted), isoform CRA_b OS=Rattus norvegicus GN=Ap1s1 PE=2 SV=1	1	0.461318	0.301477
1357	2	2	10.42	10.42	10.42	tr|B2RZB6|B2RZB6_RAT	LSM8 homolog, U6 small nuclear RNA associated (S. cerevisiae) OS=Rattus norvegicus GN=Naa38 PE=4 SV=1	1	1.23595	0.671753
1358	2	2	2.009	2.009	2.009	sp|Q9WVH8|FBLN5_RAT	Fibulin-5 OS=Rattus norvegicus GN=Fbln5 PE=2 SV=1	1	0.717794	0.561525
1359	2	2	26.97	26.97	26.97	sp|Q9R1T1|BAF_RAT	Barrier-to-autointegration factor OS=Rattus norvegicus GN=Banf1 PE=1 SV=1	1	1.07647	0.824913
1360	2	2	13.41	13.41	13.41	sp|Q80XX4|MSTN1_RAT	Musculoskeletal embryonic nuclear protein 1 OS=Rattus norvegicus GN=Mustn1 PE=2 SV=1	1	0.928966	0.866067
1361	2	2	11.11	11.11	11.11	sp|Q2IBC5|CAV2_RAT	Caveolin-2 OS=Rattus norvegicus GN=Cav2 PE=1 SV=2	1	0.731139	0.576355
1362	2	2	14.29	14.29	14.29	sp|P80432|COX7C_RAT	Cytochrome c oxidase subunit 7C, mitochondrial OS=Rattus norvegicus GN=Cox7c PE=1 SV=2	1	2.18776	0.298227
1363	2	2	8.434	8.434	8.434	sp|P62078|TIM8B_RAT	Mitochondrial import inner membrane translocase subunit Tim8 B OS=Rattus norvegicus GN=Timm8b PE=2 SV=1	1	0.416869	0.270015
1364	2	2	2.778	2.778	2.778	sp|P31211|CBG_RAT	Corticosteroid-binding globulin OS=Rattus norvegicus GN=Serpina6 PE=1 SV=2	1	1.09648	0.840675
1365	2	2	5.373	5.373	5.373	sp|P29266|3HIDH_RAT	3-hydroxyisobutyrate dehydrogenase, mitochondrial OS=Rattus norvegicus GN=Hibadh PE=1 SV=3	1	0.83946	0.755905
1366	2	2	3.834	3.834	3.834	sp|P26260|SDC1_RAT	Syndecan-1 OS=Rattus norvegicus GN=Sdc1 PE=2 SV=2	2
1367	2	2	13.89	13.89	13.89	sp|B0K020|CISD1_RAT	CDGSH iron-sulfur domain-containing protein 1 OS=Rattus norvegicus GN=Cisd1 PE=3 SV=1	1	0.895365	0.819945
1368	1.96	2.01	5.896	4.308	4.308	tr|F1M8K3|F1M8K3_RAT	Transcription factor GATA-4 OS=Rattus norvegicus GN=Gata4 PE=4 SV=1	1	0.660694	0.486819
1369	1.96	2	3.041	2.326	2.326	tr|D3ZVQ7|D3ZVQ7_RAT	CDKN2A-interacting protein OS=Rattus norvegicus GN=Cdkn2aip PE=4 SV=1	1	2.24905	0.284187
1370	1.93	2.03	5.025	0.5647	0.5647	tr|F1LRI2|F1LRI2_RAT	Protein Col18a1 OS=Rattus norvegicus GN=Col18a1 PE=4 SV=1	1	1.14815	0.581515
1371	1.92	2.94	5.572	5.572	5.572	sp|Q6AY65|ARFP2_RAT	Arfaptin-2 OS=Rattus norvegicus GN=Arfip2 PE=2 SV=1	2	1.1695	0.74335
1372	1.92	2.06	10.44	3.03	3.03	tr|F1LNG7|F1LNG7_RAT	Protein Gna13 (Fragment) OS=Rattus norvegicus GN=Gna13 PE=4 SV=1	1	0.946237	0.986342
1373	1.92	2.06	6.148	2.254	2.254	tr|F8WFI6|F8WFI6_RAT	Protein kinase C and casein kinase substrate in neurons 2 protein OS=Rattus norvegicus GN=Pacsin2 PE=4 SV=1	1	0.895365	0.832387
1374	1.92	1.93	5.387	3.704	3.704	tr|F2Z3T7|F2Z3T7_RAT	Isochorismatase domain-containing protein 1 OS=Rattus norvegicus GN=Isoc1 PE=4 SV=1	1	0.937562	0.935956
1375	1.92	1.92	7.514	3.142	2.322	sp|O08619|F13A_RAT	Coagulation factor XIII A chain OS=Rattus norvegicus GN=F13a1 PE=2 SV=3	1	0.879022	0.805567
1376	1.92	1.92	15	5	5	tr|D3ZY11|D3ZY11_RAT	Protein Pin1 OS=Rattus norvegicus GN=Pin1 PE=4 SV=1	1	0.824138	0.725633
1377	1.92	1.92	3.918	2.052	2.052	tr|D4A8G7|D4A8G7_RAT	Protein Snw1 OS=Rattus norvegicus GN=Snw1 PE=4 SV=1	1	1.1695	0.739272
1378	1.92	1.92	8.203	4.297	4.297	tr|D3ZXH5|D3ZXH5_RAT	Protein Thoc4 OS=Rattus norvegicus GN=Thoc4 PE=4 SV=1	1	1.05682	0.900805
1379	1.92	1.92	10.14	6.757	6.757	tr|D3ZQY2|D3ZQY2_RAT	Uncharacterized protein OS=Rattus norvegicus PE=4 SV=1	1	0.990832	0.995624
1380	1.92	1.92	17.16	8.209	8.209	tr|D3ZJX5|D3ZJX5_RAT	Uncharacterized protein OS=Rattus norvegicus PE=4 SV=1	1	0.765597	0.634125
1381	1.92	1.92	4.717	2.594	2.594	tr|F1M0Q9|F1M0Q9_RAT	Protein Pm20d1 (Fragment) OS=Rattus norvegicus GN=Pm20d1 PE=4 SV=1	1	0.963829	0.950668
1382	1.92	1.92	8.696	5.797	5.797	tr|D4A096|D4A096_RAT	Uncharacterized protein OS=Rattus norvegicus GN=RGD1561738 PE=4 SV=1	1	1.39316	0.546269
1383	1.92	1.92	22.58	16.13	16.13	sp|P63055|PCP4_RAT	Purkinje cell protein 4 OS=Rattus norvegicus GN=Pcp4 PE=1 SV=2	1	1.22462	0.65167
1384	1.92	1.92	11.67	11.67	11.67	sp|D3Z9R8|68MP_RAT	6.8 kDa mitochondrial proteolipid OS=Rattus norvegicus GN=Mp68 PE=1 SV=1	1	0.660694	0.480548
1385	1.91	1.91	9.253	2.491	2.491	tr|Q5RK08|Q5RK08_RAT	Glioblastoma amplified sequence OS=Rattus norvegicus GN=Gbas PE=2 SV=1	1	0.242103	0.534771
1386	1.9	2.23	6.472	6.149	4.531	sp|Q5XID1|CPIN1_RAT	Anamorsin OS=Rattus norvegicus GN=Ciapin1 PE=2 SV=1	1	1.22462	0.68563
1387	1.9	1.9	4.897	3.608	3.608	tr|F1LTK5|F1LTK5_RAT	Ferrochelatase (Fragment) OS=Rattus norvegicus GN=Fech PE=3 SV=1	1	1.00925	0.969132
1388	1.89	3.7	12.66	6.751	6.751	sp|Q8VHK7|HDGF_RAT	Hepatoma-derived growth factor OS=Rattus norvegicus GN=Hdgf PE=1 SV=2	2	2.58226	0.246257
1389	1.89	3.46	8.664	7.22	5.054	sp|P69682|NECP1_RAT	Adaptin ear-binding coat-associated protein 1 OS=Rattus norvegicus GN=Necap1 PE=1 SV=1	2	0.990832	0.826323
1390	1.89	2.38	7.839	2.754	1.059	sp|Q32PZ3|UN45A_RAT	Protein unc-45 homolog A OS=Rattus norvegicus GN=Unc45a PE=2 SV=1	1	0.685488	0.51819
1391	1.89	1.89	6.405	2.169	2.169	sp|P50475|SYAC_RAT	Alanine--tRNA ligase, cytoplasmic OS=Rattus norvegicus GN=Aars PE=1 SV=3	2	0.597035	0.421476
1392	1.89	1.89	12.16	5.743	2.703	tr|Q6QI16|Q6QI16_RAT	LRRGT00192 OS=Rattus norvegicus GN=RGD1304704 PE=2 SV=1	1	1.0666	0.757079
1393	1.89	1.89	5.38	1.424	1.424	tr|Q6AZ35|Q6AZ35_RAT	Cytoplasmic dynein 1 intermediate chain 2 OS=Rattus norvegicus GN=Dync1i2 PE=2 SV=1	1	1.23595	0.6689
1394	1.89	1.89	3.067	1.314	1.314	tr|F1M8E6|F1M8E6_RAT	DNA ligase OS=Rattus norvegicus GN=Lig1 PE=3 SV=1	1	0.937562	0.91262
1395	1.89	1.89	6.15	3.189	3.189	tr|D4ACM9|D4ACM9_RAT	Protein Mfap1a OS=Rattus norvegicus GN=Mfap1a PE=4 SV=1	1	1.1272	0.795
1396	1.89	1.89	5.502	2.265	2.265	tr|F1LMW7|F1LMW7_RAT	Myristoylated alanine-rich C-kinase substrate OS=Rattus norvegicus GN=Marcks PE=4 SV=1	1	1.31826	0.603016
1397	1.89	1.89	1.866	1.244	1.244	tr|F1LVZ7|F1LVZ7_RAT	Transmembrane 9 superfamily member 4 (Fragment) OS=Rattus norvegicus GN=Tm9sf4 PE=4 SV=1	1	0.801678	0.678866
1398	1.88	1.88	15.1	7.347	3.673	tr|Q6AY58|Q6AY58_RAT	B-cell receptor-associated protein 31 OS=Rattus norvegicus GN=Bcap31 PE=2 SV=1	1	0.855067	0.774008
1399	1.87	1.89	4.98	1.442	0.5242	tr|E9PTY5|E9PTY5_RAT	DNA topoisomerase 2 OS=Rattus norvegicus GN=Top2a PE=3 SV=1	1	1.05682	0.837585
1400	1.86	1.87	9.901	2.97	2.97	tr|E9PTF9|E9PTF9_RAT	Protein Wasf2 OS=Rattus norvegicus GN=Wasf2 PE=4 SV=1	1	6.08135	0.135047
1401	1.86	1.86	6.667	3.81	2.143	tr|Q9QX71|Q9QX71_RAT	Napsin OS=Rattus norvegicus GN=Napsa PE=2 SV=1	1	0.847227	0.76343
1402	1.85	17.86	16.58	12.61	10.63	tr|D3ZR53|D3ZR53_RAT	Protein phosphatase 1 regulatory subunit 12A OS=Rattus norvegicus GN=Ppp1r12a PE=4 SV=1	11	0.816582	0.713318
1403	1.85	1.89	17.32	10.24	10.24	tr|D3ZYJ2|D3ZYJ2_RAT	Protein Ostbeta OS=Rattus norvegicus GN=Slc51b PE=4 SV=1	1	0.990832	0.996863
1404	1.85	1.86	17.05	6.912	3.687	tr|D4A7Y6|D4A7Y6_RAT	Ribosomal protein OS=Rattus norvegicus GN=RGD1566137 PE=3 SV=1	1	0.619441	0.444852
1405	1.85	1.86	7.505	3.448	2.028	tr|F8WFT3|F8WFT3_RAT	NADPH:adrenodoxin oxidoreductase, mitochondrial OS=Rattus norvegicus GN=Fdxr PE=3 SV=1	1	0.981748	0.983099
1406	1.85	1.85	8.026	2.632	1.579	tr|F1M7H3|F1M7H3_RAT	Protein LOC100359912 (Fragment) OS=Rattus norvegicus GN=LOC100359912 PE=4 SV=1	1	0.529663	0.307396
1407	1.84	1.92	4.592	1.188	0.7918	tr|F1LS86|F1LS86_RAT	Protein Iars OS=Rattus norvegicus GN=Iars PE=3 SV=1	1	1.0666	0.704516
1408	1.84	1.84	11.73	9.184	4.082	sp|Q9EPX0|HSPB8_RAT	Heat shock protein beta-8 OS=Rattus norvegicus GN=Hspb8 PE=1 SV=1	1	1.04713	0.896482
1409	1.82	1.82	9.091	9.091	9.091	tr|G3V946|G3V946_RAT	AIP1, isoform CRA_a OS=Rattus norvegicus GN=Dpy30 PE=4 SV=1	1	1.51356	0.478113
1410	1.82	1.82	5.291	5.291	5.291	sp|B2RZ37|REEP5_RAT	Receptor expression-enhancing protein 5 OS=Rattus norvegicus GN=Reep5 PE=1 SV=1	1	1.52757	0.467271
1411	1.81	2.4	10.83	1.828	1.125	tr|F1LR42|F1LR42_RAT	Protein Rufy1 OS=Rattus norvegicus GN=Rufy1 PE=4 SV=1	1	1.07647	0.529464
1412	1.8	1.82	8.8	4.6	2	sp|P50554|GABT_RAT	4-aminobutyrate aminotransferase, mitochondrial OS=Rattus norvegicus GN=Abat PE=1 SV=3	1	1.03753	0.927707
1413	1.8	1.81	2.523	1.992	1.328	tr|G3V9R4|G3V9R4_RAT	Bifunctional UDP-N-acetylglucosamine 2-epimerase/N-acetylmannosamine kinase OS=Rattus norvegicus GN=Gne PE=4 SV=1	1	1.52757	0.471068
1414	1.8	1.8	6.173	4.527	4.527	tr|D3ZK98|D3ZK98_RAT	Yorkie homolog OS=Rattus norvegicus GN=Yap1 PE=4 SV=1	2	0.772681	0.525179
1415	1.8	1.8	10.23	5.581	5.581	tr|O88565|O88565_RAT	Protein Rab5a OS=Rattus norvegicus GN=Rab5a PE=2 SV=1	1	0.928966	0.894814
1416	1.8	1.8	6.599	6.599	6.599	tr|O08769|O08769_RAT	Cyclin dependent kinase inhibitor OS=Rattus norvegicus GN=Cdkn1b PE=2 SV=1	1	0.794328	0.668583
1417	1.78	1.8	4.392	1.226	1.226	tr|D3ZMF8|D3ZMF8_RAT	Rho guanine nucleotide exchange factor 1 OS=Rattus norvegicus GN=Arhgef1 PE=4 SV=1	1	1.0666	0.891648
1418	1.78	1.78	6.256	1.586	1.586	tr|D4A510|D4A510_RAT	Protein Smarcc2 OS=Rattus norvegicus GN=Smarcc2 PE=4 SV=1	2	1.03753	0.925483
1419	1.77	2.59	4.85	1.25	0.55	tr|F1LM91|F1LM91_RAT	Protein Myo18a OS=Rattus norvegicus GN=Myo18a PE=4 SV=1	1	0.937562	0.90357
1420	1.77	1.83	4.173	1.192	1.192	tr|D4A7R0|D4A7R0_RAT	Protein Srp72 OS=Rattus norvegicus GN=Srp72 PE=4 SV=1	1	0.524808	0.351531
1421	1.77	1.78	10.36	3.358	3.358	tr|D3ZVM5|D3ZVM5_RAT	Protein Hspa12b OS=Rattus norvegicus GN=Hspa12b PE=4 SV=1	2	1.30617	0.610086
1422	1.77	1.77	23.08	23.08	16.35	sp|P20767|LAC2_RAT	Ig lambda-2 chain C region OS=Rattus norvegicus PE=4 SV=1	1
1423	1.76	1.76	6.658	2.264	1.198	tr|F8WFT8|F8WFT8_RAT	Nucleolar transcription factor 1 OS=Rattus norvegicus GN=Ubtf PE=4 SV=1	1	1.0666	0.820023
1424	1.75	1.82	8.766	3.936	3.041	tr|F1LZA6|F1LZA6_RAT	3-phosphoinositide-dependent protein kinase 1 (Fragment) OS=Rattus norvegicus GN=Pdpk1 PE=4 SV=1	1	1.65959	0.413665
1425	1.75	1.77	10.54	5.946	4.324	sp|Q3MHS2|ZN830_RAT	Zinc finger protein 830 OS=Rattus norvegicus GN=Znf830 PE=2 SV=1	1	1.1272	0.792954
1426	1.75	1.75	4.098	2.732	2.732	tr|Q68FS8|Q68FS8_RAT	Protein Rtcd1 OS=Rattus norvegicus GN=Rtcd1 PE=2 SV=1	1	0.787046	0.661625
1427	1.75	1.75	12.02	9.135	5.288	tr|F1M7U8|F1M7U8_RAT	Protein-L-isoaspartate O-methyltransferase (Fragment) OS=Rattus norvegicus GN=Pcmt1 PE=3 SV=1	1	0.847227	0.741894
1428	1.74	1.75	7.011	2.768	2.768	tr|F8WFI0|F8WFI0_RAT	Delta-1-pyrroline-5-carboxylate dehydrogenase, mitochondrial (Fragment) OS=Rattus norvegicus GN=Aldh4a1 PE=3 SV=1	1	1.49969	0.478964
1429	1.74	1.74	20.93	10.47	10.47	tr|F1M1H5|F1M1H5_RAT	Protein RGD1562977 (Fragment) OS=Rattus norvegicus GN=RGD1562977 PE=3 SV=1	1	1.00925	0.946728
1430	1.74	1.74	12.69	9.701	9.701	tr|D3ZMH2|D3ZMH2_RAT	Protein LOC100366057 OS=Rattus norvegicus GN=LOC100366057 PE=4 SV=1	1	1.08643	0.855879
1431	1.74	1.74	6.944	6.944	6.944	sp|Q06145|GIP_RAT	Gastric inhibitory polypeptide OS=Rattus norvegicus GN=Gip PE=2 SV=2	1	1.15878	0.760365
1432	1.74	1.74	3.254	3.254	3.254	sp|P56603|SCAM1_RAT	Secretory carrier-associated membrane protein 1 OS=Rattus norvegicus GN=Scamp1 PE=1 SV=1	1	0.660694	0.486254
1433	1.73	9.06	25.61	25.61	14.63	sp|P68511|1433F_RAT	14-3-3 protein eta OS=Rattus norvegicus GN=Ywhah PE=1 SV=2	6	0.928966	0.671673
1434	1.73	1.8	6.072	2.277	1.328	tr|F1M6X5|F1M6X5_RAT	Thioredoxin reductase 2, mitochondrial (Fragment) OS=Rattus norvegicus GN=Txnrd2 PE=3 SV=1	1	1.88799	0.346801
1435	1.73	1.73	2.721	0.8746	0.8746	tr|D4A8P9|D4A8P9_RAT	Uncharacterized protein OS=Rattus norvegicus PE=3 SV=1	1	0.946237	0.925621
1436	1.72	3.38	6.192	4.644	4.644	tr|D3ZPY8|D3ZPY8_RAT	Protein Akr1c12 OS=Rattus norvegicus GN=Akr1c12 PE=4 SV=1	2	1.1272	0.782449
1437	1.72	1.72	3.75	2.083	2.083	sp|P14173|DDC_RAT	Aromatic-L-amino-acid decarboxylase OS=Rattus norvegicus GN=Ddc PE=1 SV=1	1	1.36773	0.559668
1438	1.72	1.72	1.619	1.619	1.619	tr|D3ZCB7|D3ZCB7_RAT	Protein Syvn1 OS=Rattus norvegicus GN=Syvn1 PE=4 SV=1	1	0.444631	0.289748
1439	1.71	1.71	4.545	1.299	1.299	sp|Q5FVC7|ACAP2_RAT	Arf-GAP with coiled-coil, ANK repeat and PH domain-containing protein 2 OS=Rattus norvegicus GN=Acap2 PE=2 SV=1	1	0.954993	0.943698
1440	1.71	1.71	5.24	1.647	1.647	sp|Q5BK10|CAN13_RAT	Calpain-13 OS=Rattus norvegicus GN=Capn13 PE=2 SV=1	1	0.711214	0.537086
1441	1.71	1.71	4.752	2.273	2.273	tr|D3ZW08|D3ZW08_RAT	Adenylosuccinate lyase (Predicted) OS=Rattus norvegicus GN=Adsl PE=4 SV=1	1	0.83946	0.748231
1442	1.7	16	43.6	43.6	43.6	tr|B0BMS8|B0BMS8_RAT	Myl9 protein OS=Rattus norvegicus GN=Myl9 PE=2 SV=1	16	1.1272	0.807436
1443	1.7	14.19	29.5	22.54	22.54	sp|P29457|SERPH_RAT	Serpin H1 OS=Rattus norvegicus GN=Serpinh1 PE=1 SV=1	7	1.23595	0.667895
1444	1.7	2.82	8.378	1.909	1.909	tr|Q5U2M4|Q5U2M4_RAT	DNA ligase OS=Rattus norvegicus GN=Lig3 PE=2 SV=1	2	0.685488	0.523166
1445	1.7	2.39	5.668	1.923	0.9109	tr|D4ABD7|D4ABD7_RAT	Protein Trip11 OS=Rattus norvegicus GN=Trip11 PE=4 SV=1	2	0.879022	0.806289
1446	1.7	1.7	2.2	1.65	0.7333	tr|Q9ERS3|Q9ERS3_RAT	Voltage-dependent calcium channel subunit alpha-2/delta-1 OS=Rattus norvegicus GN=Cacna2d1 PE=2 SV=1	1
1447	1.7	1.7	7.865	5.056	5.056	tr|D4AB07|D4AB07_RAT	PEST proteolytic signal-containing nuclear protein OS=Rattus norvegicus GN=Pcnp PE=4 SV=1	1	1.05682	0.904701
1448	1.69	1.69	5.9	1.032	1.032	tr|D3ZLL1|D3ZLL1_RAT	Protein Ankrd6 OS=Rattus norvegicus GN=Ankrd6 PE=4 SV=1	1	1.01859	0.977909
1449	1.68	3.92	13.01	4.394	3.163	tr|G3V829|G3V829_RAT	Protein Fubp3 OS=Rattus norvegicus GN=Fubp3 PE=4 SV=1	2	1.0666	0.634853
1450	1.68	1.78	4.03	1.679	0.9236	tr|F1M981|F1M981_RAT	Phosphatidylinositol 3,4,5-trisphosphate 5-phosphatase 1 OS=Rattus norvegicus GN=Inpp5d PE=4 SV=1	1	1.23595	0.671778
1451	1.68	1.68	5.857	1.757	1.757	tr|D3ZWN7|D3ZWN7_RAT	Protein Prpf3 OS=Rattus norvegicus GN=Prpf3 PE=4 SV=1	1
1452	1.67	1.72	7.956	1.372	1.372	tr|G3V6Z7|G3V6Z7_RAT	Golgi autoantigen, golgin subfamily a, 5, isoform CRA_a OS=Rattus norvegicus GN=Golga5 PE=4 SV=1	1	1.92309	0.282881
1453	1.67	1.71	9.892	2.318	2.318	tr|F1LR19|F1LR19_RAT	Phosphatidylinositol-binding clathrin assembly protein OS=Rattus norvegicus GN=Picalm PE=4 SV=1	1	0.887156	0.751495
1454	1.67	1.67	9.15	4.052	1.307	tr|B5DFC3|B5DFC3_RAT	Protein Sec23a OS=Rattus norvegicus GN=Sec23a PE=2 SV=1	1	0.831764	0.313771
1455	1.67	1.67	9.863	7.945	7.945	tr|D3ZRE3|D3ZRE3_RAT	Casein kinase I isoform alpha OS=Rattus norvegicus GN=Csnk1a1 PE=3 SV=1	2	0.642688	0.468332
1456	1.67	1.67	4.492	2.6	2.6	sp|Q68FW9|CSN3_RAT	COP9 signalosome complex subunit 3 OS=Rattus norvegicus GN=Cops3 PE=2 SV=1	1	0.630957	0.455611
1457	1.66	2.27	3.599	1.062	0.767	tr|D3ZD79|D3ZD79_RAT	Uncharacterized protein OS=Rattus norvegicus PE=4 SV=1	1
1458	1.66	1.91	10.68	2.422	1.709	tr|F1M7X3|F1M7X3_RAT	Protein Cdh13 (Fragment) OS=Rattus norvegicus GN=Cdh13 PE=4 SV=1	1	0.83946	0.657784
1459	1.66	1.79	5.577	3.113	1.686	sp|Q5FVM7|DJC16_RAT	DnaJ homolog subfamily C member 16 OS=Rattus norvegicus GN=Dnajc16 PE=2 SV=1	1	0.636796	0.463877
1460	1.66	1.66	9.315	2.109	2.109	tr|F1M8Z9|F1M8Z9_RAT	Protein Rap1gds1 (Fragment) OS=Rattus norvegicus GN=Rap1gds1 PE=4 SV=1	1	0.847227	0.798933
1461	1.66	1.66	9.012	4.651	4.651	tr|F1LQ27|F1LQ27_RAT	Protein RGD1303117 OS=Rattus norvegicus GN=RGD1303117 PE=4 SV=1	2	0.83946	0.742681
1462	1.66	1.66	4.138	2.414	2.414	tr|D4A1X3|D4A1X3_RAT	Coiled-coil domain-containing protein 50 OS=Rattus norvegicus GN=Ccdc50 PE=4 SV=1	1
1463	1.65	1.65	4.282	0.5962	0.5962	RRRRRtr|D3ZWC4|D3ZWC4_RAT	REVERSED Collagen alpha-1(XXVII) chain OS=Rattus norvegicus GN=Col27a1 PE=4 SV=1	1	1.36773	0.732991
1464	1.64	1.71	11.58	3.509	3.509	tr|F1M6Z8|F1M6Z8_RAT	Protein Snrpa (Fragment) OS=Rattus norvegicus GN=Snrpa PE=4 SV=1	1	0.954993	0.940374
1465	1.64	1.71	21.88	14.06	14.06	tr|D3ZZW2|D3ZZW2_RAT	Protein LOC684976 OS=Rattus norvegicus GN=Tma7 PE=4 SV=1	1	1.28233	0.709294
1466	1.64	1.67	14.29	5.59	5.59	tr|D4A3X3|D4A3X3_RAT	Interferon, alpha-inducible protein (Clone IFI-15K) (Predicted) OS=Rattus norvegicus GN=Isg15 PE=4 SV=1	1	0.862979	0.766459
1467	1.64	1.67	4.421	3.368	3.368	tr|F1LSU9|F1LSU9_RAT	Protein Wash2 OS=Rattus norvegicus GN=Wash2 PE=4 SV=1	1	0.847227	0.761576
1468	1.64	1.65	2.727	0.9091	0.9091	tr|F1M0M0|F1M0M0_RAT	Protein RGD1563533 (Fragment) OS=Rattus norvegicus GN=RGD1563533 PE=4 SV=1	1	0.794328	0.670077
1469	1.64	1.65	5.628	3.247	3.247	tr|F1LSN7|F1LSN7_RAT	Protein Gopc OS=Rattus norvegicus GN=Gopc PE=4 SV=1	1	1.13763	0.781234
1470	1.64	1.64	5.732	0.8917	0.8917	tr|D4A3G2|D4A3G2_RAT	Protein RGD1566355 OS=Rattus norvegicus GN=RGD1566355 PE=4 SV=1	1	0.855067	0.77005
1471	1.64	1.64	5.043	1.441	1.441	tr|D4A1Y3|D4A1Y3_RAT	Serine/threonine-protein phosphatase 2A 65 kDa regulatory subunit A beta isoform OS=Rattus norvegicus GN=Ppp2r1b PE=4 SV=1	1	0.559758	0.384281
1472	1.64	1.64	8.83	4.194	4.194	tr|F1M8E7|F1M8E7_RAT	Protein Ptpn18 OS=Rattus norvegicus GN=Ptpn18 PE=4 SV=1	1	0.765597	0.628541
1473	1.64	1.64	3.283	1.524	1.524	tr|F1LRP7|F1LRP7_RAT	Protein argonaute-2 (Fragment) OS=Rattus norvegicus GN=Eif2c2 PE=4 SV=1	1	0.855067	0.777225
1474	1.64	1.64	15.57	7.377	7.377	tr|F1LQ96|F1LQ96_RAT	Gamma-synuclein OS=Rattus norvegicus GN=Sncg PE=4 SV=1	1	1.51356	0.474686
1475	1.64	1.64	2.746	2.1	2.1	tr|Q66HT2|Q66HT2_RAT	Epidermal Langerhans cell protein LCP1 OS=Rattus norvegicus GN=Tox4 PE=2 SV=1	1	0.787046	0.664367
1476	1.64	1.64	5.896	3.401	3.401	tr|E9PTI1|E9PTI1_RAT	Protein Atp6v1h OS=Rattus norvegicus GN=Atp6v1h PE=4 SV=1	1	0.879022	0.817587
1477	1.63	1.63	33.8	26.76	26.76	tr|F1M0Z9|F1M0Z9_RAT	Uncharacterized protein (Fragment) OS=Rattus norvegicus PE=4 SV=1	3	1.08643	0.57264
1478	1.62	2.77	6.278	4.036	4.036	tr|D3ZVU7|D3ZVU7_RAT	Histone deacetylase OS=Rattus norvegicus PE=3 SV=1	2	0.816582	0.703141
1479	1.62	1.62	4.673	1.335	1.335	tr|E9PU73|E9PU73_RAT	Uncharacterized protein OS=Rattus norvegicus PE=4 SV=1	1	0.972747	0.963884
1480	1.62	1.62	7.821	5.028	5.028	tr|B2RYW3|B2RYW3_RAT	NADH dehydrogenase (Ubiquinone) 1 beta subcomplex, 9 OS=Rattus norvegicus GN=Ndufb9 PE=2 SV=1	1	0.862979	0.795682
1481	1.62	1.62	19.12	11.76	11.76	sp|Q9WUC4|ATOX1_RAT	Copper transport protein ATOX1 OS=Rattus norvegicus GN=Atox1 PE=1 SV=1	1	1.11686	0.902689
1482	1.62	1.62	4.956	3.79	3.79	sp|P81799|NAGK_RAT	N-acetyl-D-glucosamine kinase OS=Rattus norvegicus GN=Nagk PE=1 SV=4	1	1.0666	0.885337
1483	1.61	3.19	7.952	3.855	3.855	sp|P19223|CBPB1_RAT	Carboxypeptidase B OS=Rattus norvegicus GN=Cpb1 PE=1 SV=1	2	1.7378	0.386016
1484	1.61	1.62	9.778	2.222	2.222	tr|E9PU13|E9PU13_RAT	Protein Snx4 OS=Rattus norvegicus GN=Snx4 PE=4 SV=1	1	0.794328	0.678197
1485	1.61	1.61	8.247	1.675	1.675	tr|A2RRT6|A2RRT6_RAT	RCG27903, isoform CRA_b OS=Rattus norvegicus GN=Zc3hav1 PE=2 SV=1	1	0.648634	0.473288
1486	1.6	2.24	5.896	1.926	0.7005	tr|D4A121|D4A121_RAT	Intersectin 1 OS=Rattus norvegicus GN=Itsn1 PE=4 SV=1	1	1.15878	0.763757
1487	1.6	1.73	4.318	1.151	0.5181	sp|P08649|CO4_RAT	Complement C4 OS=Rattus norvegicus GN=C4 PE=1 SV=3	1	1.2942	0.611493
1488	1.6	1.6	3.509	1.754	1.754	tr|Q499T3|Q499T3_RAT	Sirpa protein OS=Rattus norvegicus GN=Sirpa PE=2 SV=1	1	1.30617	0.606705
1489	1.59	1.63	2.919	1.382	1.382	sp|Q4AE70|CARM1_RAT	Histone-arginine methyltransferase CARM1 OS=Rattus norvegicus GN=Carm1 PE=1 SV=1	1	1.99526	0.325767
1490	1.59	1.6	6.085	2.646	2.646	tr|F1M7L9|F1M7L9_RAT	Protein Pkp2 (Fragment) OS=Rattus norvegicus GN=Pkp2 PE=4 SV=1	1	0.816582	0.892745
1491	1.59	1.6	4.508	2.869	2.869	sp|Q562C4|MET7B_RAT	Methyltransferase-like protein 7B OS=Rattus norvegicus GN=Mettl7b PE=1 SV=1	1	0.963829	0.952498
1492	1.58	1.59	13.95	5.116	5.116	tr|F1LQS0|F1LQS0_RAT	Protein Nmi OS=Rattus norvegicus GN=Nmi PE=4 SV=1	1	0.554626	0.377307
1493	1.58	1.58	6.775	2.168	2.168	sp|O08618|KPRB_RAT	Phosphoribosyl pyrophosphate synthase-associated protein 2 OS=Rattus norvegicus GN=Prpsap2 PE=2 SV=1	1	0.731139	0.564006
1494	1.57	1.6	6.86	2.442	1.395	tr|F1M356|F1M356_RAT	Protein Eml4 (Fragment) OS=Rattus norvegicus GN=Eml4 PE=4 SV=1	1	0.428549	0.277267
1495	1.56	2.72	6.436	0.8973	0.4641	tr|D4A3N6|D4A3N6_RAT	Protein Golgb1 OS=Rattus norvegicus GN=Golgb1 PE=4 SV=1	2	1.34276	0.46747
1496	1.56	1.56	5.906	3.259	2.037	tr|F1M883|F1M883_RAT	Uncharacterized protein (Fragment) OS=Rattus norvegicus PE=4 SV=1	1	0.981748	0.921925
1497	1.56	1.56	11.59	7.536	7.536	sp|P30919|ASPG_RAT	N(4)-(Beta-N-acetylglucosaminyl)-L-asparaginase OS=Rattus norvegicus GN=Aga PE=1 SV=2	3	0.887156	0.567829
1498	1.55	1.58	8.61	1.353	1.353	tr|D3ZFP4|D3ZFP4_RAT	Protein LOC367976 OS=Rattus norvegicus GN=Mcm3 PE=3 SV=1	1	1.14815	0.771049
1499	1.55	1.55	3.005	1.366	1.366	tr|G3V817|G3V817_RAT	Protein Xrcc5 OS=Rattus norvegicus GN=Xrcc5 PE=4 SV=1	1	1.85353	0.3565
1500	1.54	1.56	10.02	2.249	2.249	sp|Q03346|MPPB_RAT	Mitochondrial-processing peptidase subunit beta OS=Rattus norvegicus GN=Pmpcb PE=1 SV=3	1	0.758578	0.615933
1501	1.53	1.53	4.487	1.835	0.9517	tr|D4A9V8|D4A9V8_RAT	Uncharacterized protein OS=Rattus norvegicus PE=4 SV=1	1	1.04713	0.836293
1502	1.52	1.56	3.743	2.406	2.406	tr|Q6AYJ9|Q6AYJ9_RAT	ADP-ribosyltransferase 3 OS=Rattus norvegicus GN=Art3 PE=2 SV=1	1	1.25892	0.654981
1503	1.52	1.55	11.24	4.016	4.016	sp|Q711G3|IAH1_RAT	Isoamyl acetate-hydrolyzing esterase 1 homolog OS=Rattus norvegicus GN=Iah1 PE=2 SV=2	1	1.08643	0.851152
1504	1.52	1.54	4.107	0.9551	0.9551	sp|D3ZBP4|MICA1_RAT	Protein-methionine sulfoxide oxidase MICAL1 OS=Rattus norvegicus GN=Mical1 PE=3 SV=1	1	0.92045	0.560896
1505	1.52	1.52	6.375	3.586	3.586	tr|F1LRW4|F1LRW4_RAT	Methionine adenosyltransferase 2 subunit beta (Fragment) OS=Rattus norvegicus GN=Mat2b PE=4 SV=1	1	1.2942	0.620702
1506	1.51	4.78	7.904	5.67	5.67	tr|E9PT65|E9PT65_RAT	Protein Rdx OS=Rattus norvegicus GN=Rdx PE=4 SV=1	4	0.855067	0.857792
1507	1.51	1.54	6.145	2.235	2.235	RRRRRsp|Q9Z2X5|HOME3_RAT	REVERSED Homer protein homolog 3 OS=Rattus norvegicus GN=Homer3 PE=2 SV=2	1
1508	1.51	1.51	12.94	12.94	4.118	sp|Q498E0|TXD12_RAT	Thioredoxin domain-containing protein 12 OS=Rattus norvegicus GN=Txndc12 PE=2 SV=2	1	0.787046	0.542575
1509	1.5	1.54	3.317	0.8293	0.4838	tr|D3ZLD5|D3ZLD5_RAT	Protein Golga3 OS=Rattus norvegicus GN=Golga3 PE=4 SV=1	1
1510	1.5	1.5	8.493	5.205	2.192	sp|Q9R066|CXAR_RAT	Coxsackievirus and adenovirus receptor homolog OS=Rattus norvegicus GN=Cxadr PE=2 SV=2	1	0.903649	0.805145
1511	1.49	1.56	5.916	1.587	1.587	sp|Q4V7C6|GUAA_RAT	GMP synthase [glutamine-hydrolyzing] OS=Rattus norvegicus GN=Gmps PE=1 SV=1	1	0.887156	0.826374
1512	1.49	1.51	3.997	1.39	0.8688	tr|G3V8L7|G3V8L7_RAT	Integrin alpha M OS=Rattus norvegicus GN=Itgam PE=3 SV=1	1	0.92045	0.881841
1513	1.49	1.49	7.801	4.255	4.255	sp|B0BNE5|ESTD_RAT	S-formylglutathione hydrolase OS=Rattus norvegicus GN=Esd PE=1 SV=1	1
1514	1.49	1.49	5.515	4.044	4.044	tr|D3ZW38|D3ZW38_RAT	Protein Exosc6 OS=Rattus norvegicus GN=Exosc6 PE=4 SV=1	1	1.49969	0.48384
1515	1.48	2.19	6.158	2.833	1.232	sp|Q01177|PLMN_RAT	Plasminogen OS=Rattus norvegicus GN=Plg PE=2 SV=2	1	0.92045	0.213111
1516	1.48	1.48	8.487	1.273	1.273	sp|Q07266|DREB_RAT	Drebrin OS=Rattus norvegicus GN=Dbn1 PE=2 SV=3	1	1.21339	0.69429
1517	1.48	1.48	6.209	2.941	2.941	tr|D4A104|D4A104_RAT	Mitochondrial ribosomal protein L45 (Predicted) OS=Rattus norvegicus GN=Mrpl45 PE=4 SV=1	1	1.07647	0.862871
1518	1.47	1.47	12.72	9.669	1.781	tr|Q5XIJ3|Q5XIJ3_RAT	Isocitrate dehydrogenase 3 (NAD), gamma OS=Rattus norvegicus GN=Idh3g PE=2 SV=1	1	0.299226	0.0590248
1519	1.47	1.47	6.991	2.432	2.432	sp|P20762|IGG2C_RAT	Ig gamma-2C chain C region OS=Rattus norvegicus PE=2 SV=1	1	1.18032	0.728597
1520	1.46	1.56	5.849	2.064	1.491	tr|Q6QI75|Q6QI75_RAT	LRRG00133 OS=Rattus norvegicus GN=Wdr55 PE=2 SV=1	1	0.824138	0.717697
1521	1.46	1.47	14.29	9.821	9.821	tr|F1M3S4|F1M3S4_RAT	Uncharacterized protein (Fragment) OS=Rattus norvegicus PE=4 SV=1	1	1.24738	0.694219
1522	1.46	1.46	14.7	6.452	3.943	sp|O35115|FHL2_RAT	Four and a half LIM domains protein 2 OS=Rattus norvegicus GN=Fhl2 PE=1 SV=1	1	1.00925	0.968198
1523	1.45	1.45	7.796	4.57	2.151	sp|Q9HB97|PARVA_RAT	Alpha-parvin OS=Rattus norvegicus GN=Parva PE=1 SV=2	1	0.847227	0.76105
1524	1.44	1.44	6.989	6.989	6.989	sp|O88350|RBBP9_RAT	Putative hydrolase RBBP9 OS=Rattus norvegicus GN=Rbbp9 PE=1 SV=2	1	1.59956	0.436375
1525	1.43	1.52	5.161	1.398	0.8602	tr|Q4KMA8|Q4KMA8_RAT	Endoplasmic reticulum aminopeptidase 1 OS=Rattus norvegicus GN=Erap1 PE=2 SV=1	1	0.92045	0.884905
1526	1.43	1.46	7.925	3.585	1.698	tr|Q5U2S7|Q5U2S7_RAT	Proteasome (Prosome, macropain) 26S subunit, non-ATPase, 3 OS=Rattus norvegicus GN=Psmd3 PE=2 SV=1	1	0.452898	0.294471
1527	1.43	1.43	26.89	6.723	6.723	tr|D4AD33|D4AD33_RAT	Protein Fam103a1 OS=Rattus norvegicus GN=Fam103a1 PE=4 SV=1	1	1.19124	0.715413
1528	1.43	1.43	32.56	25.58	10.47	tr|D4A5T1|D4A5T1_RAT	Protein Sf3b5 OS=Rattus norvegicus GN=Sf3b5 PE=4 SV=1	1	0.855067	0.77118
1529	1.43	1.43	5.844	5.844	5.844	tr|D4A4Q4|D4A4Q4_RAT	Protein LOC100365923 OS=Rattus norvegicus GN=Ociad2 PE=4 SV=1	1	1.1272	0.792352
1530	1.42	1.43	6.297	1.931	1.343	tr|F1MAJ2|F1MAJ2_RAT	Uncharacterized protein OS=Rattus norvegicus PE=4 SV=1	1	1.22462	0.679721
1531	1.42	1.42	11.36	3.737	1.794	tr|F1LPB7|F1LPB7_RAT	Spermatid perinuclear RNA-binding protein OS=Rattus norvegicus GN=Strbp PE=4 SV=1	1	0.440555	0.287184
1532	1.42	1.42	5.839	2.007	1.369	tr|F1LM09|F1LM09_RAT	Ubiquitin carboxyl-terminal hydrolase OS=Rattus norvegicus GN=Usp7 PE=3 SV=1	1	1.00925	0.967935
1533	1.42	1.42	12.73	3.261	1.398	sp|Q9EQR2|ADAS_RAT	Alkyldihydroxyacetonephosphate synthase, peroxisomal OS=Rattus norvegicus GN=Agps PE=2 SV=1	1	0.515229	0.344206
1534	1.42	1.42	5.725	1.718	1.718	tr|Q68FX8|Q68FX8_RAT	Mitochondrial-processing peptidase subunit alpha OS=Rattus norvegicus GN=Pmpca PE=2 SV=1	1	0.758578	0.615928
1535	1.41	1.41	5.146	1.252	1.252	tr|F1M7H2|F1M7H2_RAT	Polymeric immunoglobulin receptor (Fragment) OS=Rattus norvegicus GN=Pigr PE=4 SV=1	1	0.83946	0.748285
1536	1.39	1.41	3.087	1.745	0.9396	tr|D4ABT8|D4ABT8_RAT	Protein Hnrnpul2 OS=Rattus norvegicus GN=Hnrnpul2 PE=4 SV=1	1	0.564937	0.364391
1537	1.39	1.4	13.25	3.614	2.41	tr|Q66HM7|Q66HM7_RAT	Lupus La protein homolog OS=Rattus norvegicus GN=Ssb PE=2 SV=1	1	0.912011	0.442353
1538	1.39	1.39	6.403	2.561	1.048	tr|D4A962|D4A962_RAT	Heterogeneous nuclear ribonucleoprotein U-like 1 (Predicted) OS=Rattus norvegicus GN=Hnrnpul1 PE=4 SV=1	1	0.928966	0.90015
1539	1.38	1.38	16.03	5.128	5.128	tr|F1LT35|F1LT35_RAT	Protein RGD1564606 (Fragment) OS=Rattus norvegicus GN=RGD1564606 PE=3 SV=1	1	1.34276	0.579189
1540	1.37	2.61	5.444	1.512	1.512	tr|F1M673|F1M673_RAT	Protein LOC499229 (Fragment) OS=Rattus norvegicus GN=LOC499229 PE=4 SV=1	2	1	0.978363
1541	1.37	2.12	15.3	10.38	10.38	tr|Q5RJK5|Q5RJK5_RAT	Chromobox homolog 3 (HP1 gamma homolog, Drosophila) OS=Rattus norvegicus GN=Cbx3 PE=2 SV=1	2	1.01859	0.94781
1542	1.35	1.59	8.108	2.317	0.9653	sp|P70496-2|PLD1_RAT	Isoform PLD1B of Phospholipase D1 OS=Rattus norvegicus GN=Pld1	1	0.619441	0.442626
1543	1.35	1.36	6.954	2.158	2.158	tr|F1M7S4|F1M7S4_RAT	Mast cell carboxypeptidase A OS=Rattus norvegicus GN=Cpa3 PE=4 SV=1	1	0.990832	0.998644
1544	1.35	1.35	6.729	2.32	2.32	tr|F1LMJ8|F1LMJ8_RAT	EF-hand domain-containing family member A1 OS=Rattus norvegicus GN=Efha1 PE=4 SV=1	1	0.879022	0.817191
1545	1.35	1.35	10.41	7.063	3.346	sp|P29975|AQP1_RAT	Aquaporin-1 OS=Rattus norvegicus GN=Aqp1 PE=2 SV=4	1	1.30617	0.59943
1546	1.35	1.35	5.747	3.448	3.448	sp|B0BNN3|CAH1_RAT	Carbonic anhydrase 1 OS=Rattus norvegicus GN=Ca1 PE=1 SV=1	1	0.794328	0.676741
1547	1.34	1.34	14.08	4.126	1.942	tr|Q5M9H7|Q5M9H7_RAT	Chaperone protein DnaJ OS=Rattus norvegicus GN=Dnaja2 PE=2 SV=1	1	1.03753	0.881849
1548	1.34	1.34	6.832	4.348	4.348	sp|P01830|THY1_RAT	Thy-1 membrane glycoprotein OS=Rattus norvegicus GN=Thy1 PE=1 SV=1	1	1.41906	0.469111
1549	1.34	1.34	4.217	4.217	4.217	tr|D4A1Q8|D4A1Q8_RAT	Protein RGD1562344 OS=Rattus norvegicus GN=Bcl2l15 PE=4 SV=1	1	1.52757	0.467945
1550	1.33	3.01	16.05	9.877	6.584	tr|F8WFW9|F8WFW9_RAT	Protein Tmem189 (Fragment) OS=Rattus norvegicus GN=LOC679539 PE=4 SV=1	2	0.928966	0.993971
1551	1.33	1.4	7.684	2.561	1.281	sp|Q9ESN0|NIBAN_RAT	Protein Niban OS=Rattus norvegicus GN=Fam129a PE=2 SV=2	1	1.15878	0.719733
1552	1.32	1.32	3.945	1.887	1.887	tr|D4A6M1|D4A6M1_RAT	Protein Irgq OS=Rattus norvegicus GN=Irgq PE=4 SV=1	1	0.855067	0.769946
1553	1.29	2.17	10.46	2.934	1.913	tr|G3V6G7|G3V6G7_RAT	Polyribonucleotide nucleotidyltransferase 1 OS=Rattus norvegicus GN=Pnpt1 PE=4 SV=1	2	0.928966	0.901464
1554	1.29	1.33	7.034	1.655	1.655	tr|D3ZLM5|D3ZLM5_RAT	NHL repeat containing 2 (Predicted) OS=Rattus norvegicus GN=Nhlrc2 PE=4 SV=1	1	0.862979	0.787501
1555	1.29	1.29	11.08	6.552	3.432	sp|Q5PQQ2|WBP11_RAT	WW domain-binding protein 11 OS=Rattus norvegicus GN=Wbp11 PE=2 SV=1	2	1.18032	0.648452
1556	1.29	1.29	10.2	5.248	5.248	tr|F1LPA0|F1LPA0_RAT	Protein Qars (Fragment) OS=Rattus norvegicus GN=RGD1562301 PE=4 SV=1	2	0.895365	0.920744
1557	1.29	1.29	8.765	4.781	4.781	sp|Q6TXG9|SFR1_RAT	Swi5-dependent recombination DNA repair protein 1 homolog OS=Rattus norvegicus GN=Sfr1 PE=2 SV=1	1	0.824138	0.720415
1558	1.28	3.6	11.96	6.135	4.294	tr|D3ZFQ8|D3ZFQ8_RAT	Cytochrome c-1 (Predicted), isoform CRA_c OS=Rattus norvegicus GN=Cyc1 PE=4 SV=1	2	1.43219	0.517723
1559	1.28	1.44	10.85	5.814	5.814	sp|Q5RK19|SNF8_RAT	Vacuolar-sorting protein SNF8 OS=Rattus norvegicus GN=Snf8 PE=1 SV=1	2	0.847227	0.761093
1560	1.28	1.28	11.81	11.81	5.512	sp|P61972|NTF2_RAT	Nuclear transport factor 2 OS=Rattus norvegicus GN=Nutf2 PE=1 SV=1	1	0.972747	0.963408
1561	1.27	1.38	4.283	3.542	0.9061	tr|D3ZSA9|D3ZSA9_RAT	Protein Nomo1 OS=Rattus norvegicus GN=Nomo1 PE=4 SV=1	1	0.855067	0.457272
1562	1.26	1.27	6.085	4.497	4.497	sp|Q6AXS3|DEK_RAT	Protein DEK OS=Rattus norvegicus GN=Dek PE=2 SV=1	2	1.30617	0.596474
1563	1.26	1.26	3.098	3.098	1.983	tr|G3V7M2|G3V7M2_RAT	Integrin beta OS=Rattus norvegicus GN=Itgb7 PE=3 SV=1	1	1.04713	0.918039
1564	1.25	1.25	10.11	1.311	1.311	tr|D4A8E3|D4A8E3_RAT	ADP-ribosylation factor GTPase-activating protein 2 OS=Rattus norvegicus GN=Arfgap2 PE=4 SV=1	1	0.824138	0.715704
1565	1.25	1.25	9.836	3.689	3.689	tr|Q1RP74|Q1RP74_RAT	Protein Tbcb OS=Rattus norvegicus GN=Tbcb PE=2 SV=1	1	1.8197	0.364834
1566	1.25	1.25	5.604	2.277	2.277	sp|Q5XI01|LARP7_RAT	La-related protein 7 OS=Rattus norvegicus GN=Larp7 PE=1 SV=2	1	1.0666	0.879698
1567	1.25	1.25	9.375	5	5	tr|D3ZE37|D3ZE37_RAT	40S ribosomal protein S11 OS=Rattus norvegicus GN=Rps11 PE=3 SV=1	1	0.862979	0.818839
1568	1.24	1.4	5.463	1.498	1.057	tr|F1LP24|F1LP24_RAT	Protein Cytsa OS=Rattus norvegicus GN=Specc1l PE=4 SV=1	1	0.580764	0.403184
1569	1.23	1.7	4.227	1.932	1.329	tr|F1LRR7|F1LRR7_RAT	Protein St14 (Fragment) OS=Rattus norvegicus GN=St14 PE=3 SV=1	1	1.0666	0.870389
1570	1.23	1.25	9.583	2.917	0.9375	tr|D3ZAS8|D3ZAS8_RAT	Protein Sart3 OS=Rattus norvegicus GN=Sart3 PE=4 SV=1	1	0.981748	0.947684
1571	1.22	1.39	6.587	3.992	2.595	tr|Q4KLI7|Q4KLI7_RAT	Protein Sf3a3 OS=Rattus norvegicus GN=Sf3a3 PE=2 SV=1	1	0.60256	0.425664
1572	1.22	1.23	15.09	5.189	5.189	sp|O35165|GOSR2_RAT	Golgi SNAP receptor complex member 2 OS=Rattus norvegicus GN=Gosr2 PE=1 SV=2	1
1573	1.21	14.75	29.93	25	25	tr|Q923Z2|Q923Z2_RAT	Tropomyosin 1, alpha, isoform CRA_a OS=Rattus norvegicus GN=Tpm1 PE=2 SV=1	13	1.22462	0.533934
1574	1.21	1.3	5.401	0.6301	0.405	tr|D3ZX19|D3ZX19_RAT	Myomegalin OS=Rattus norvegicus GN=Pde4dip PE=4 SV=1	1	1.33045	0.591814
1575	1.21	1.21	7.175	7.175	3.139	sp|Q8CGS4|CHMP3_RAT	Charged multivesicular body protein 3 OS=Rattus norvegicus GN=Chmp3 PE=1 SV=3	1	1.34276	0.482808
1576	1.2	1.21	11.04	3.247	3.247	tr|B2RZ64|B2RZ64_RAT	Mbd3 protein (Fragment) OS=Rattus norvegicus GN=Mbd3 PE=2 SV=1	1	1.34276	0.575193
1577	1.2	1.2	4.43	2.848	2.848	tr|D4A2P3|D4A2P3_RAT	Prostaglandin reductase 2 OS=Rattus norvegicus GN=Ptgr2 PE=4 SV=1	1	0.954993	0.938432
1578	1.2	1.2	4.012	2.469	2.469	sp|Q9QYU2|EFTS_RAT	Elongation factor Ts, mitochondrial OS=Rattus norvegicus GN=Tsfm PE=2 SV=1	1	0.648634	0.47404
1579	1.19	3.5	8.126	3.98	2.819	tr|F1LQK0|F1LQK0_RAT	Protein Bche (Fragment) OS=Rattus norvegicus GN=Bche PE=4 SV=1	3	1.02802	0.989726
1580	1.19	1.23	9.983	4.738	1.861	sp|Q3KRE0|ATAD3_RAT	ATPase family AAA domain-containing protein 3 OS=Rattus norvegicus GN=Atad3 PE=1 SV=1	1	0.903649	0.71778
1581	1.19	1.2	4.13	1.196	1.196	tr|E9PT66|E9PT66_RAT	Protein Sf3b3 OS=Rattus norvegicus GN=Sf3b3 PE=4 SV=1	1	0.794328	0.588538
1582	1.16	3.38	9.524	3.571	3.571	tr|F1MAC0|F1MAC0_RAT	Protein Ifi47 OS=Rattus norvegicus GN=Ifi47 PE=4 SV=1	2	1.85353	0.357338
1583	1.15	1.21	1.946	0.856	0.856	RRRRRtr|F1MAL8|F1MAL8_RAT	REVERSED Uncharacterized protein OS=Rattus norvegicus PE=4 SV=1	1	0.691831	0.52571
1584	1.15	1.19	6.148	2.459	2.459	sp|Q5RKL5|STEA3_RAT	Metalloreductase STEAP3 OS=Rattus norvegicus GN=Steap3 PE=2 SV=1	1	1.01859	0.957146
1585	1.15	1.16	14.05	14.05	4.324	tr|D4A3T3|D4A3T3_RAT	Protein Cbx1 OS=Rattus norvegicus GN=Cbx1 PE=4 SV=1	1	1.11686	0.811654
1586	1.14	1.15	5.239	1.281	1.281	tr|D3ZG37|D3ZG37_RAT	Protein Saps1 OS=Rattus norvegicus GN=Ppp6r1 PE=4 SV=1	1	0.937562	0.912471
1587	1.14	1.14	5.579	1.931	1.931	sp|P10354|CMGA_RAT	Chromogranin-A OS=Rattus norvegicus GN=Chga PE=1 SV=1	1	1.11686	0.815765
1588	1.13	1.36	18.12	8.696	8.696	tr|D4A2C6|D4A2C6_RAT	LSM4 homolog, U6 small nuclear RNA associated (S. cerevisiae) (Predicted), isoform CRA_a OS=Rattus norvegicus GN=Lsm4 PE=4 SV=1	1	0.928966	0.892569
1589	1.13	1.26	2.636	1.49	0.6877	tr|F1M4A0|F1M4A0_RAT	Protein Tjp1 (Fragment) OS=Rattus norvegicus GN=Tjp1 PE=4 SV=1	1	1.24738	0.660519
1590	1.13	1.13	8.788	5.152	3.03	sp|P06214|HEM2_RAT	Delta-aminolevulinic acid dehydratase OS=Rattus norvegicus GN=Alad PE=1 SV=1	1	0.954993	0.938731
1591	1.13	1.13	14.43	9.278	9.278	tr|G3V8D4|G3V8D4_RAT	Apolipoprotein C-II (Predicted) OS=Rattus norvegicus GN=Apoc2 PE=4 SV=1	1	1.39316	0.546702
1592	1.12	1.15	2.021	0.8982	0.524	RRRRRtr|D4A058|D4A058_RAT	REVERSED Protein Atad5 OS=Rattus norvegicus GN=Atad5 PE=4 SV=1	1
1593	1.12	1.12	10.08	3.232	3.232	tr|G3V6E4|G3V6E4_RAT	Acyl-Coenzyme A binding domain containing 3 OS=Rattus norvegicus GN=Acbd3 PE=4 SV=1	1
1594	1.12	1.12	12.99	5.844	5.844	tr|B2RZA9|B2RZA9_RAT	Protein Ube2l3 OS=Rattus norvegicus GN=Ube2l3 PE=2 SV=1	1	1.18032	0.439882
1595	1.12	1.12	3.704	3.395	3.395	tr|Q4QQS6|Q4QQS6_RAT	Asparagine-linked glycosylation 5 homolog (Yeast, dolichyl-phosphate beta-glucosyltransferase), isoform CRA_a OS=Rattus norvegicus GN=Alg5 PE=2 SV=1	1	1.1695	0.750195
1596	1.12	1.12	11.92	6.623	6.623	tr|D4A7L4|D4A7L4_RAT	NADH dehydrogenase (Ubiquinone) 1 beta subcomplex, 11 (Predicted) OS=Rattus norvegicus GN=Ndufb11 PE=4 SV=1	1	0.972747	0.935893
1597	1.12	1.12	13.27	8.163	8.163	sp|P07808|NPY_RAT	Pro-neuropeptide Y OS=Rattus norvegicus GN=Npy PE=1 SV=1	1	0.794328	0.676415
1598	1.12	1.12	1.662	1.662	1.662	tr|G3V8F5|G3V8F5_RAT	Mitochondrial import receptor subunit TOM40 homolog OS=Rattus norvegicus GN=Tomm40 PE=4 SV=1	1
1599	1.11	1.14	8.723	4.05	4.05	tr|D3ZDK7|D3ZDK7_RAT	Protein Pgp OS=Rattus norvegicus GN=Pgp PE=4 SV=1	1	0.679204	0.515045
1600	1.11	1.11	13.24	10.99	2.535	sp|Q561S0|NDUAA_RAT	NADH dehydrogenase [ubiquinone] 1 alpha subcomplex subunit 10, mitochondrial OS=Rattus norvegicus GN=Ndufa10 PE=1 SV=1	1	0.928966	0.484852
1601	1.1	2.9	3.555	2.782	2.009	tr|D3ZUM4|D3ZUM4_RAT	Beta-galactosidase OS=Rattus norvegicus GN=Glb1 PE=3 SV=1	2	1.08643	0.864178
1602	1.1	1.16	7.434	4.317	1.918	tr|Q5XI23|Q5XI23_RAT	Makorin, ring finger protein, 2 OS=Rattus norvegicus GN=Mkrn2 PE=2 SV=1	1	1.15878	0.760919
1603	1.09	1.11	5.818	3.273	2.182	sp|Q5U2V4|PLBL1_RAT	Phospholipase B-like 1 OS=Rattus norvegicus GN=Plbd1 PE=2 SV=1	1	0.816582	0.3023
1604	1.08	1.08	7.286	2.764	2.764	tr|Q9EQS4|Q9EQS4_RAT	Cystathionase (Cystathionine gamma-lyase) OS=Rattus norvegicus GN=Cth PE=2 SV=2	1	1.2942	0.415647
1605	1.08	1.08	26.97	17.98	17.98	sp|P05964|S10A6_RAT	Protein S100-A6 OS=Rattus norvegicus GN=S100a6 PE=1 SV=3	2
1606	1.07	1.08	6.464	2.662	2.662	tr|F1MA56|F1MA56_RAT	Chymotrypsinogen B OS=Rattus norvegicus GN=Ctrb1 PE=3 SV=1	1	2.72898	0.234795
1607	1.07	1.07	11.25	4.255	2.128	sp|P97584|PTGR1_RAT	Prostaglandin reductase 1 OS=Rattus norvegicus GN=Ptgr1 PE=2 SV=3	1	1.31826	0.602586
1608	1.07	1.07	10.77	6.734	3.704	tr|Q4KLY1|Q4KLY1_RAT	Protein Rem1 OS=Rattus norvegicus GN=Rem1 PE=2 SV=1	1
1609	1.07	1.07	4.183	4.183	4.183	tr|Q5U1Z9|Q5U1Z9_RAT	Metaxin 2 OS=Rattus norvegicus GN=Mtx2 PE=2 SV=1	1	1.39316	0.540509
1610	1.06	1.06	4.61	2.837	2.837	sp|P16296|FA9_RAT	Coagulation factor IX (Fragment) OS=Rattus norvegicus GN=F9 PE=2 SV=1	1
1611	1.05	2.18	13.65	6.426	3.012	sp|P15791-7|KCC2D_RAT	Isoform Delta 7 of Calcium/calmodulin-dependent protein kinase type II subunit delta OS=Rattus norvegicus GN=Camk2d	2	1.15878	0.758827
1612	1.05	1.46	7.175	2.278	0.7973	tr|D3ZMS1|D3ZMS1_RAT	Protein Sf3b2 OS=Rattus norvegicus GN=Sf3b2 PE=4 SV=1	1	1.04713	0.726302
1613	1.05	1.24	15.21	5.817	2.461	sp|P36876|2ABA_RAT	Serine/threonine-protein phosphatase 2A 55 kDa regulatory subunit B alpha isoform OS=Rattus norvegicus GN=Ppp2r2a PE=2 SV=1	1	0.83946	0.475262
1614	1.05	1.05	9.178	4.398	2.868	tr|G3V7G0|G3V7G0_RAT	Cytoplasmic dynein 1 light intermediate chain 1 OS=Rattus norvegicus GN=Dync1li1 PE=4 SV=1	1	0.570164	0.3913
1615	1.04	1.1	6.977	2.132	2.132	sp|Q3KR97|BI2L1_RAT	Brain-specific angiogenesis inhibitor 1-associated protein 2-like protein 1 OS=Rattus norvegicus GN=Baiap2l1 PE=2 SV=1	1	1.1272	0.795521
1616	1.04	1.09	5.804	3.571	3.571	tr|F1M2H4|F1M2H4_RAT	Ubiquitin carboxyl-terminal hydrolase isozyme L1 (Fragment) OS=Rattus norvegicus GN=Uchl1 PE=4 SV=1	1
1617	1.04	1.08	2.028	0.3226	0.3226	RRRRRtr|D3ZF86|D3ZF86_RAT	REVERSED Protein RGD1309903 OS=Rattus norvegicus GN=RGD1309903 PE=4 SV=1	1	0.831764	0.810619
1618	1.04	1.05	9.434	9.434	9.434	tr|D3ZLX2|D3ZLX2_RAT	Protein RGD1311783 OS=Rattus norvegicus GN=RGD1311783 PE=4 SV=1	1	0.519996	0.348451
1619	1.03	1.04	5.698	3.134	3.134	tr|B1WC70|B1WC70_RAT	Protein Ppp1r8 OS=Rattus norvegicus GN=Ppp1r8 PE=2 SV=1	1	1.13763	0.778721
1620	1.03	1.03	11.82	11.82	5.419	tr|D3ZGY1|D3ZGY1_RAT	Protein Wibg OS=Rattus norvegicus GN=Wibg PE=4 SV=1	1	0.990832	0.995371
1621	1.02	1.02	2.807	2.807	2.807	sp|Q6MG60|DDAH2_RAT	N(G),N(G)-dimethylarginine dimethylaminohydrolase 2 OS=Rattus norvegicus GN=Ddah2 PE=1 SV=1	1	0.613762	0.43742
1622	1.01	1.04	11.68	2.103	2.103	sp|Q5M9F1|RBM34_RAT	RNA-binding protein 34 OS=Rattus norvegicus GN=Rbm34 PE=2 SV=1	1	1.38038	0.549713
1623	1.01	1.03	27.27	7.692	7.692	tr|D4A9Q3|D4A9Q3_RAT	Protein RGD1563570 OS=Rattus norvegicus GN=RGD1563570 PE=3 SV=1	1	1.45881	0.501894
1624	1.01	1.02	9.6	1.28	1.28	tr|B2RYI2|B2RYI2_RAT	Protein Srp68 OS=Rattus norvegicus GN=Srp68 PE=2 SV=1	1	1.58489	0.441769
1625	1.01	1.02	11.36	1.939	1.939	sp|Q91Y81|SEPT2_RAT	Septin-2 OS=Rattus norvegicus GN=Sept2 PE=1 SV=1	1	0.758578	0.308836
1626	1.01	1.01	14.22	4.128	4.128	tr|D3ZQL7|D3ZQL7_RAT	Protein Tppp OS=Rattus norvegicus GN=Tppp PE=4 SV=1	1	1.09648	0.841433
1627	1	1	4.512	1.657	0.8287	tr|D3ZZX3|D3ZZX3_RAT	Ceruloplasmin OS=Rattus norvegicus GN=Cp PE=4 SV=1	1	0.928966	0.721757
1628	1	1	11.34	6.701	6.701	tr|D3ZWR1|D3ZWR1_RAT	Protein LOC100360582 OS=Rattus norvegicus GN=LOC100360582 PE=4 SV=1	1	0.92045	0.880939
1629	1	1	4.636	4.636	4.636	sp|P62278|RS13_RAT	40S ribosomal protein S13 OS=Rattus norvegicus GN=Rps13 PE=1 SV=2	1	0.855067	0.762973
1630	0.98	1	12.37	9.14	4.839	tr|D4A1B8|D4A1B8_RAT	Protein Dctn3 OS=Rattus norvegicus GN=Dctn3 PE=4 SV=1	1	1	0.950245
1631	0.98	0.98	7.778	6.111	3.333	tr|D4A746|D4A746_RAT	GDP-mannose pyrophosphorylase B (Predicted), isoform CRA_a OS=Rattus norvegicus GN=Gmppb PE=4 SV=1	1	0.972747	0.96778
1632	0.98	0.98	2.994	1.198	1.198	tr|F1M3W2|F1M3W2_RAT	Protein Atxn2 (Fragment) OS=Rattus norvegicus GN=Atxn2 PE=4 SV=1	1	0.496592	0.329363
1633	0.97	0.97	3.203	3.203	3.203	tr|D4ABT3|D4ABT3_RAT	Protein CDV3 homolog OS=Rattus norvegicus GN=Cdv3 PE=4 SV=1	1	1.08643	0.859429
1634	0.97	0.97	6.122	6.122	6.122	sp|D4ACN8|PLRKT_RAT	Plasminogen receptor (KT) OS=Rattus norvegicus GN=Plgrkt PE=1 SV=1	1	0.824138	0.71577
1635	0.96	3.36	17.21	14.88	8.837	tr|B0BMW0|B0BMW0_RAT	RAB14, member RAS oncogene family OS=Rattus norvegicus GN=Rab14 PE=2 SV=1	2	0.816582	0.807521
1636	0.96	1.39	6.829	6.829	4.39	sp|P02764|A1AG_RAT	Alpha-1-acid glycoprotein OS=Rattus norvegicus GN=Orm1 PE=2 SV=1	1	1.01859	0.992198
1637	0.96	0.96	3.509	2.412	2.412	tr|G3V6R7|G3V6R7_RAT	3-oxoacyl-[acyl-carrier-protein] synthase, mitochondrial OS=Rattus norvegicus GN=Oxsm PE=3 SV=1	1	1.18032	0.738447
1638	0.95	3.16	5.627	5.627	4.092	tr|Q5U2T0|Q5U2T0_RAT	Death associated protein 3 OS=Rattus norvegicus GN=Dap3 PE=2 SV=1	2
1639	0.95	0.95	5.128	3.205	3.205	tr|D3ZU08|D3ZU08_RAT	Protein Napg OS=Rattus norvegicus GN=Napg PE=4 SV=1	1	0.855067	0.486746
1640	0.94	0.99	3.756	0.4108	0.4108	tr|D3ZT52|D3ZT52_RAT	Protein Pbrm1 OS=Rattus norvegicus GN=Pbrm1 PE=4 SV=1	1	0.751623	0.610857
1641	0.93	1.03	2.912	1.073	0.6897	tr|F1LMD9|F1LMD9_RAT	Cyclin-G-associated kinase OS=Rattus norvegicus GN=Gak PE=4 SV=1	1	1.35519	0.567301
1642	0.93	0.93	3.984	3.984	3.984	tr|B2RYT7|B2RYT7_RAT	Haloacid dehalogenase-like hydrolase domain containing 3 OS=Rattus norvegicus GN=Hdhd3 PE=2 SV=1	1
1643	0.92	1.4	11.06	8.04	8.04	tr|G3V6A6|G3V6A6_RAT	Protein RGD1566265 OS=Rattus norvegicus GN=RGD1566265 PE=4 SV=1	3	1.14815	0.478961
1644	0.92	0.95	4.428	0.8639	0.8639	RRRRRtr|F1LYX1|F1LYX1_RAT	REVERSED Protein Kctd19 (Fragment) OS=Rattus norvegicus GN=Kctd19 PE=4 SV=1	1	1.28233	0.629381
1645	0.92	0.92	8.993	4.317	4.317	sp|Q7TSE9|HAX1_RAT	HCLS1-associated protein X-1 OS=Rattus norvegicus GN=Hax1 PE=1 SV=1	1	0.704693	0.547368
1646	0.92	0.92	5.414	2.229	2.229	sp|Q6AZ50|ATG3_RAT	Ubiquitin-like-conjugating enzyme ATG3 OS=Rattus norvegicus GN=Atg3 PE=2 SV=1	1	1.38038	0.548884
1647	0.92	0.92	6.986	2.196	2.196	RRRRRtr|F1M4B6|F1M4B6_RAT	REVERSED Protein RGD1563349 (Fragment) OS=Rattus norvegicus GN=RGD1563349 PE=4 SV=1	1	0.711214	0.549409
1648	0.92	0.92	4.545	4.545	4.545	sp|Q6PDW6|RM17_RAT	39S ribosomal protein L17, mitochondrial OS=Rattus norvegicus GN=Mrpl17 PE=2 SV=1	1	0.413047	0.269301
1649	0.91	1.1	4.522	1.542	0.8222	tr|D3ZYQ9|D3ZYQ9_RAT	Protein Rnf20 OS=Rattus norvegicus GN=Rnf20 PE=4 SV=1	2	0.928966	0.899238
1650	0.91	0.93	4.755	2.657	1.538	tr|F1LP30|F1LP30_RAT	Methylcrotonoyl-CoA carboxylase subunit alpha, mitochondrial OS=Rattus norvegicus GN=Mccc1 PE=4 SV=1	1	1.01859	0.859689
1651	0.91	0.91	27.08	14.58	14.58	sp|Q8K585-2|HMGA1_RAT	Isoform HMG-Y of High mobility group protein HMG-I/HMG-Y OS=Rattus norvegicus GN=Hmga1	1	1.08643	0.848095
1652	0.9	0.92	9.307	3.247	1.948	tr|F1LPS6|F1LPS6_RAT	Protein Ifit1 (Fragment) OS=Rattus norvegicus GN=Ifit1 PE=4 SV=1	1	0.717794	0.421506
1653	0.9	0.91	7.273	4.773	2.045	tr|D4A833|D4A833_RAT	Mitochondrial ribosomal protein S30 (Predicted), isoform CRA_a OS=Rattus norvegicus GN=Mrps30 PE=4 SV=1	1	0.724436	0.52616
1654	0.9	0.9	27.72	18.81	6.931	sp|Q5I0H3|SUMO1_RAT	Small ubiquitin-related modifier 1 OS=Rattus norvegicus GN=Sumo1 PE=1 SV=1	1	0.912011	0.550128
1655	0.9	0.9	3.46	3.46	3.46	tr|Q68G41|Q68G41_RAT	Dodecenoyl-Coenzyme A delta isomerase (3,2 trans-enoyl-Coenzyme A isomerase) OS=Rattus norvegicus GN=Eci1 PE=2 SV=1	1	0.691831	0.52884
1656	0.89	1.02	6.637	3.097	3.097	tr|D4A1B2|D4A1B2_RAT	Protein RGD1311021 OS=Rattus norvegicus GN=RGD1311021 PE=4 SV=1	1	1.48594	0.488645
1657	0.89	0.92	6.549	3.526	1.259	sp|Q80Z70|SE1L1_RAT	Protein sel-1 homolog 1 OS=Rattus norvegicus GN=Sel1l PE=2 SV=2	1	0.879022	0.587365
1658	0.89	0.91	10.81	6.88	4.177	sp|P14562|LAMP1_RAT	Lysosome-associated membrane glycoprotein 1 OS=Rattus norvegicus GN=Lamp1 PE=1 SV=1	2	1.10662	0.735238
1659	0.89	0.89	1.944	1.944	0.9722	sp|Q63151|ACSL3_RAT	Long-chain-fatty-acid--CoA ligase 3 OS=Rattus norvegicus GN=Acsl3 PE=1 SV=1	1
1660	0.88	0.88	14.72	8.225	4.762	sp|Q9QYL8|LYPA2_RAT	Acyl-protein thioesterase 2 OS=Rattus norvegicus GN=Lypla2 PE=1 SV=1	1	0.831764	0.731562
1661	0.88	0.88	12.5	8.036	8.036	sp|P83941|ELOC_RAT	Transcription elongation factor B polypeptide 1 OS=Rattus norvegicus GN=Tceb1 PE=1 SV=1	1	1.05682	0.703102
1662	0.87	0.99	10.24	2.953	1.969	sp|P22791|HMCS2_RAT	Hydroxymethylglutaryl-CoA synthase, mitochondrial OS=Rattus norvegicus GN=Hmgcs2 PE=2 SV=1	1	0.946237	0.919816
1663	0.86	0.86	4.637	1.714	0.8065	tr|G3V927|G3V927_RAT	Discs, large homolog-associated protein 4 (Drosophila) OS=Rattus norvegicus GN=Dlgap4 PE=4 SV=1	1	0.691831	0.526949
1664	0.86	0.86	6.577	0.9744	0.9744	tr|A9CMB8|A9CMB8_RAT	DNA replication licensing factor MCM6 OS=Rattus norvegicus GN=Mcm6 PE=2 SV=1	1	1.33045	0.468897
1665	0.85	0.86	5.759	5.759	5.759	sp|Q8CFN2|CDC42_RAT	Cell division control protein 42 homolog OS=Rattus norvegicus GN=Cdc42 PE=1 SV=2	1	1.00925	0.977604
1666	0.85	0.86	6.25	6.25	6.25	sp|Q561R9|LACB2_RAT	Beta-lactamase-like protein 2 OS=Rattus norvegicus GN=Lactb2 PE=2 SV=1	1	0.704693	0.547257
1667	0.84	0.85	7.143	4.147	2.074	tr|Q4VBH2|Q4VBH2_RAT	Protein Trnt1 OS=Rattus norvegicus GN=Trnt1 PE=2 SV=1	1	0.660694	0.49174
1668	0.84	0.85	8.259	3.348	3.348	tr|F1LR71|F1LR71_RAT	Protein Aspscr1 OS=Rattus norvegicus GN=Aspscr1 PE=4 SV=1	1	0.928966	0.892876
1669	0.84	0.84	6.25	2.187	2.187	tr|D3Z909|D3Z909_RAT	Protein Bbs5 OS=Rattus norvegicus GN=Bbs5 PE=4 SV=1	1	1.07647	0.869511
1670	0.84	0.84	7.216	5.842	5.842	sp|Q5FVQ4|MLEC_RAT	Malectin OS=Rattus norvegicus GN=Mlec PE=2 SV=1	2	0.648634	0.474083
1671	0.84	0.84	2.823	1.613	1.613	RRRRRtr|G3V8D6|G3V8D6_RAT	REVERSED Tripartite motif protein 3, isoform CRA_a OS=Rattus norvegicus GN=Trim3 PE=4 SV=1	1
1672	0.84	0.84	2.182	1.455	1.455	tr|F1M255|F1M255_RAT	Protein Dtx4 (Fragment) OS=Rattus norvegicus GN=Dtx4 PE=4 SV=1	1
1673	0.83	0.96	6.536	4.739	3.922	tr|F1LW72|F1LW72_RAT	Uncharacterized protein (Fragment) OS=Rattus norvegicus PE=4 SV=1	1	0.679204	0.511231
1674	0.83	0.88	7.292	1.172	1.172	sp|Q03555|GEPH_RAT	Gephyrin OS=Rattus norvegicus GN=Gphn PE=1 SV=3	1	0.648634	0.476333
1675	0.83	0.84	5.682	2.11	0.8117	tr|F1LSS1|F1LSS1_RAT	Structural maintenance of chromosomes protein OS=Rattus norvegicus GN=Smc1a PE=3 SV=1	1	1.09648	0.831844
1676	0.83	0.84	9.537	2.384	0.9818	tr|F1MA82|F1MA82_RAT	Protein Map7 (Fragment) OS=Rattus norvegicus GN=Map7 PE=4 SV=1	1	1.02802	0.942469
1677	0.83	0.83	5.263	1.949	1.949	tr|F1LRH5|F1LRH5_RAT	Acyl-CoA-binding domain-containing protein 5 (Fragment) OS=Rattus norvegicus GN=Acbd5 PE=4 SV=1	1	1.28233	0.57731
1678	0.82	0.84	12.3	2.913	2.913	tr|D3ZDB9|D3ZDB9_RAT	NmrA-like family domain-containing protein 1 OS=Rattus norvegicus GN=Nmral1 PE=4 SV=1	1	0.794328	0.670849
1679	0.82	0.82	18.42	11.84	11.84	tr|D3ZHD3|D3ZHD3_RAT	Protein LOC688786 OS=Rattus norvegicus GN=Pet100 PE=4 SV=1	1	1.02802	0.945493
1680	0.81	0.86	10.89	4.585	0	sp|Q920F3|KHDR2_RAT	KH domain-containing, RNA-binding, signal transduction-associated protein 2 OS=Rattus norvegicus GN=Khdrbs2 PE=1 SV=1	0	0.912011	0.776128
1681	0.81	0.81	4.021	2.145	2.145	tr|D3ZVL1|D3ZVL1_RAT	Uncharacterized protein OS=Rattus norvegicus PE=4 SV=1	2	1.78649	0.37508
1682	0.81	0.81	4.068	2.712	2.712	sp|Q5XIK2|TMX2_RAT	Thioredoxin-related transmembrane protein 2 OS=Rattus norvegicus GN=Tmx2 PE=2 SV=1	1	0.636796	0.464551
1683	0.81	0.81	5.031	5.031	5.031	tr|G3V6G1|G3V6G1_RAT	Immunoglobulin joining chain OS=Rattus norvegicus GN=Igj PE=4 SV=1	1
1684	0.81	0.81	7.101	7.101	7.101	tr|F1M8I2|F1M8I2_RAT	Protein Nat13 (Fragment) OS=Rattus norvegicus GN=Naa50 PE=4 SV=1	1	0.636796	0.461146
1685	0.8	0.8	2.548	1.115	1.115	tr|F1LXP8|F1LXP8_RAT	Protein Arhgap18 (Fragment) OS=Rattus norvegicus GN=Arhgap18 PE=4 SV=1	1	0.870964	0.799982
1686	0.79	1.21	4.52	1.764	1.213	tr|F1LPQ9|F1LPQ9_RAT	A-kinase anchor protein 2 (Fragment) OS=Rattus norvegicus GN=Akap2 PE=4 SV=1	1	1.57036	0.421381
1687	0.79	0.87	6.772	0.611	0.3564	RRRRRtr|D4ADZ6|D4ADZ6_RAT	REVERSED Protein Helz OS=Rattus norvegicus GN=Helz PE=4 SV=1	1	1.23595	0.644678
1688	0.79	0.79	3.712	2.552	2.552	tr|D4A3M7|D4A3M7_RAT	Uncharacterized protein OS=Rattus norvegicus PE=4 SV=1	1	1.28233	0.647641
1689	0.78	0.79	4.038	1.9	1.9	tr|G3V9W5|G3V9W5_RAT	Phosphatidylinositol 5-phosphate 4-kinase type-2 gamma OS=Rattus norvegicus GN=Pip4k2c PE=4 SV=1	1	0.787046	0.665641
